# Supplementary material for: A comparative metabologenomic approach reveals mechanistic insights into Streptomyces antibiotic crypticity
Source: PubMed Central journal article supplement — Proc Natl Acad Sci U S A. 2021 Jul 29;118(31):e2103515118. doi: 10.1073/pnas.2103515118 (PMC8346890; doi:10.1073/pnas.2103515118), 2021-07-29
Supplement: pnas.2103515118.sapp.pdf [file pnas.2103515118.sapp.pdf]

## Supplementary information

# A comparative metabologenomic approach reveals new mechanistic insights into *Streptomyces* antibiotic crypticity

Yunci Qi\*<sup>1</sup>, Keshav K. Nepal\*<sup>1</sup>, Joshua A. V. Blodgett<sup>1#</sup>

<sup>1</sup>Department of Biology, Washington University in St Louis, 1 Brookings Dr. St Louis, MO 63130

\*Denotes equal contributors

#To whom correspondence should be addressed:

Department of Biology, Washington University in St Louis, 133 Rebstock Hall, 1 Brookings Dr.  
CB#1137, St Louis MO 63130. Email: jblodgett@wustl.edu

Keywords: *Streptomyces griseus*, cryptic metabolism, regulation, metabologenomics, tetramic acid

## **Supplementary methods**

### **Marker-less gene deletion/promoter replacement**

All gene deletions and  $P_{ftdA}$  mutants were constructed using double homologous recombination as previously described (1). To avoid undesired recombination between the wild-type and the mutant  $P_{ftdA}$  sequences, an intermediate  $\Delta P_{ftdA}::tsr$  mutant was constructed, and the steps will be described as an example for all mutants:

Streptomycin-resistant ( $Str^R$ ) mutants of *Streptomyces sp.* strain JV180 were isolated on ISP2 +  $Str^{100}$  agar. The *rpsL* genes were amplified with primers (YQ4-Sg\_rpsL\_f and YQ5-Sg\_rpsL\_r) and sequenced. JV307 bearing the *rpsL*\_K43R mutation was chosen for subsequent experiments as no phenotypic changes were observed, including PTM production. The upstream and downstream homology regions flanking  $P_{ftdA}$  were amplified from JV180 (primers YQ211-180DPro-us-f and YQ212-180DPro-us-r; YQ213-180DPro-ds-f and YQ214-180DPro-ds-r). The *tsr* gene was amplified from pJVD53 (primers YQ215-tsr-f and YQ216-tsr-r). The vector pUC19 was linearized by PCR-amplification (primers YQ268-pUC19-us and YQ269-pUC19-ds) and digested by DpnI. PCR products were assembled using the NEBuilder HiFi Assembly kit (NEB). Correct cloning was confirmed by restriction digest and Sanger sequencing. The resulting pUC19- $\Delta P_{ftdA}::tsr$  and were digested with *Xba*I and *Hind*III and ligated into pJVD52.1 using the same restriction sites. The resulting pJVD52.1- $\Delta P_{ftdA}::tsr$  was introduced into JV307 by conjugation, and apramycin-resistant ( $Apr^R$ ) exconjugants were selected. Exconjugants were grown in TSB non-selectively at 37°C and recombinants were selected for on ISP2 +  $Apr^{50}$ .  $Apr^R$  colonies were grown TSB non-selectively at 37°C and double recombinants were selected for on ISP2 +  $Str^{100}$ . The resulting  $\Delta P_{ftdA}::tsr$  mutant was confirmed by colony PCR.

### **Circular Rapid Amplification of cDNA Ends**

*Streptomyces sp.* strain JV180 was cultured on solid ATCC172 medium overlaid with a cellophane film. After six days, mycelia were harvested from three plates and pooled in 5 mL RNAlater with 4 mm diameter beads. The mycelia were homogenized by vortexing for about 1 minute and allowed to settle for 5 minutes. The cell suspension was transferred to a clean tube and pelleted by centrifugation at  $3,214 \times g$  for 10 minutes. The supernatant was discarded the pellet was frozen at -20°C. The following day, approximately 100 mg of the frozen pellet was powdered by grinding with mortar and pestle in liquid nitrogen and resuspended in 450  $\mu$ L of buffer RLT (QIAGEN). The suspension was lysed with a Fisherbrand

model 120 sonic dismembrator at 30% amplitude with 4 cycles of 15 seconds of sonication followed by 30 second of resting. Total RNA was extracted with the QIAGEN RNeasy kit following the manufacturer's protocol after this point and its integrity was verified by gel electrophoresis.

The cRACE protocol was adapted from that of Bose and Newman (2). Genomic DNA was removed with Turbo DNase (Ambion). Superscript II Reverse Transcriptase (Invitrogen) was used to generate cDNA with random hexamers. Leftover RNA was removed with RNase H and cDNA was purified with Wizard SV Gel and PCR clean-up kit (Promega) and eluted in nuclease-free water. Adaptor ligation was performed in a buffer containing 1X RNA ligase buffer, 25% PEG 8000, 10 µg/mL BSA, 1 mM hexamine cobalt (III) chloride, 100 pmol WNP213, and 25 Units of T4 RNA (Ambion) ligase. The reaction was carried out at room temperature overnight and purified with the Wizard SV Gel and PCR clean-up kit. The eluate was used for PCR amplification with Taq DNA polymerase (NEB) using Failsafe Premix G (Epicentre) with primers WNP210 and YQ186. PCR products were amplified in a second reaction using 1.5 µL of the first reaction as template with nested primers YQ188 and YQ185 as reverse primers. PCR products were cloned into pCR2.1-TOPO using the TOPO-TA cloning kit (Invitrogen) and the inserts were Sanger sequenced by Genewiz to map the transcript start site.

### **Griseorhodin enrichment**

A griseorhodin-enriched fraction was obtained using a modified Kupchan scheme (3, 4) and solid phase extraction column. Strain JV180 was plated on approximately 1 L worth of 8340 agar plates. After 6 days, the agar plates were diced and collected in a large 2 L flask and the agar was submerged with acetonitrile overnight. The acetonitrile was collected and evaporated under low pressure and the agar was extracted with acetonitrile again. The dried extract was resuspended in 9:1 (v/v) methanol/water. The solution was extracted with equal volume of petroleum ether followed by equal volume of ethyl acetate, which extracted the red pigment from the aqueous solution. The ethyl acetate was evaporated under low pressure and resuspended with 1:1 methanol/water. A Bond Elut C18-OH (Agilent) solid phase extraction column was used to further purify the extract. The column was primed with water before the extract was loaded. The column was washed with water, and 1:3 acetonitrile /water. The red pigments were eluted by 1:1 acetonitrile/water. This fraction was dried under low pressure and resuspended in 500 µL 1:1 acetonitrile/water and filtered before LC-MS analysis.

The griseorhodin-enriched fraction was analyzed using a Phenomenex Luna C18 column (75 x 3 mm, 3 µm pore size) installed on an Agilent 1260 Infinity HPLC connected to an Agilent 6420 Triple-Quad

mass spectrometer. For each run, 10  $\mu\text{L}$  sample was injected and the chromatography conditions were as follows:  $T = 0$ , 5% B;  $T = 2$ , 5% B;  $T = 16$ , 100% B,  $T = 20$ , 100% B; A: water + 0.1% formic acid, B: acetonitrile + 0.1% formic acid; 0.7 mL/min. The diode array detector was set to measure absorbance at 488 nm. The mass spectrometer was set to mass scan mode with  $m/z$  ranges 100 – 1000 for positive and negative ions and the fragmentor voltage was set to = 70 V.

**Table S1. List of strains used in this study**

| Strain                                                     | Relevant characteristics / Genotype                                                                                                                                                                                                                                          | Source or reference       |
|------------------------------------------------------------|------------------------------------------------------------------------------------------------------------------------------------------------------------------------------------------------------------------------------------------------------------------------------|---------------------------|
| <b>Escherichia coli</b>                                    |                                                                                                                                                                                                                                                                              |                           |
| DH5 $\alpha$                                               | cloning host, F <sup>-</sup> $\phi$ 80 <i>lacZ</i> $\Delta$ M15 $\Delta$ ( <i>lacZYA-argF</i> )U169 <i>recA1 endA1 hsdR17</i> (rK <sup>-</sup> , mK <sup>+</sup> ) <i>phoA supE44</i> $\lambda$ <sup>-</sup> <i>thi-1 gyrA96 relA1</i>                                       | NEB                       |
| BL21(DE3) + Rosetta2                                       | plasmid expression host, F <sup>-</sup> <i>ompT hsdSB</i> (rB <sup>-</sup> , mB <sup>-</sup> ) <i>gal dcm</i> (DE3)                                                                                                                                                          | Novagen                   |
| JV36                                                       | conjugal donor strain, <i>dam-3 dcm-6 metB1 galK2 galT27 lacY1 tsx-78 supE44 thi-1 mel-1 tonA31 <math>\Delta</math>hsdRMS-mrr::FRT</i> (rK <sup>-</sup> mK <sup>-</sup> ) attHK::pJK202 ( $\Delta$ <i>oriR6K-aadA::FRT bla::pir</i> ) (Tra <sup>+</sup> , Amp <sup>s</sup> ) | Blodgett <i>et al</i> (5) |
| <b>Streptomyces strains</b>                                |                                                                                                                                                                                                                                                                              |                           |
| <i>Streptomyces griseus</i> subsp. <i>griseus</i> IFO13350 | model <i>Streptomyces griseus</i> strain, aka strain ISP-5235                                                                                                                                                                                                                | NRRL                      |
| <i>Streptomyces</i> sp. strain JV180                       | environmental isolate, PTM producer                                                                                                                                                                                                                                          | Blodgett <i>et al</i> (6) |
| JV251                                                      | <i>Streptomyces californicus</i> strain NRRL B-3320                                                                                                                                                                                                                          | NRRL                      |
| JV252                                                      | <i>Streptomyces floridiae</i> strain NRRL 2423                                                                                                                                                                                                                               | NRRL                      |
| JV253                                                      | <i>Streptomyces puniceus</i> strain NRRL B-2895                                                                                                                                                                                                                              | NRRL                      |
| JV254                                                      | <i>Streptomyces griseus</i> subsp. <i>griseus</i> strain NRRL F-5144                                                                                                                                                                                                         | NRRL                      |
| JV255                                                      | <i>Streptomyces globisporus</i> subsp. <i>globisporus</i> strain NRRL B-2709                                                                                                                                                                                                 | NRRL                      |
| JV256                                                      | <i>Streptomyces albus</i> subsp. <i>albus</i> strain NRRL B-2445                                                                                                                                                                                                             | NRRL                      |
| JV257                                                      | <i>Streptomyces griseus</i> subsp. <i>griseus</i> strain NRRL WC-3480                                                                                                                                                                                                        | NRRL                      |
| JV258                                                      | <i>Streptomyces baarnensis</i> strain NRRL B-2842                                                                                                                                                                                                                            | NRRL                      |
| <i>Streptomyces</i> sp. strain SP18CM02                    | environmental isolate, PTM producer                                                                                                                                                                                                                                          | Qi <i>et al</i> (7)       |
| JV307                                                      | JV180 <i>rpsL_K43R</i>                                                                                                                                                                                                                                                       | This study                |
| JV352                                                      | JV307 $\Delta$ <i>ftdA-F</i>                                                                                                                                                                                                                                                 | This study                |
| JV631                                                      | JV307 $\Delta$ P <sub><i>ftdA</i></sub> :: <i>tsr</i>                                                                                                                                                                                                                        | This study                |
| JV1851                                                     | JV307 $\Delta$ P <sub><i>ftdA</i></sub> ::P <sub><i>ermE*</i></sub> _pHM11a                                                                                                                                                                                                  | This study                |
| JV847                                                      | JV307 $\Delta$ P <sub><i>ftdA</i></sub> ::P <sub><i>ftdA</i></sub> _IFO13350                                                                                                                                                                                                 | This study                |
| JV1961                                                     | JV307 $\Delta$ P <sub><i>ftdA</i></sub> ::P <sub><i>ftdA</i></sub> _SP18CM02                                                                                                                                                                                                 | This study                |
| JV1176                                                     | JV307 $\Delta$ P <sub><i>ftdA</i></sub> ::P <sub><i>ftdA</i></sub> _JV251                                                                                                                                                                                                    | This study                |
| JV1178                                                     | JV307 $\Delta$ P <sub><i>ftdA</i></sub> ::P <sub><i>ftdA</i></sub> _JV252                                                                                                                                                                                                    | This study                |
| JV1673                                                     | JV307 $\Delta$ P <sub><i>ftdA</i></sub> ::P <sub><i>ftdA</i></sub> _JV253                                                                                                                                                                                                    | This study                |
| JV898                                                      | JV307 $\Delta$ P <sub><i>ftdA</i></sub> ::P <sub><i>ftdA</i></sub> _JV254                                                                                                                                                                                                    | This study                |
| JV1186                                                     | JV307 $\Delta$ P <sub><i>ftdA</i></sub> ::P <sub><i>ftdA</i></sub> _JV255                                                                                                                                                                                                    | This study                |
| JV1182                                                     | JV307 $\Delta$ P <sub><i>ftdA</i></sub> ::P <sub><i>ftdA</i></sub> _JV256                                                                                                                                                                                                    | This study                |
| JV1184                                                     | JV307 $\Delta$ P <sub><i>ftdA</i></sub> ::P <sub><i>ftdA</i></sub> _JV257                                                                                                                                                                                                    | This study                |
| JV1188                                                     | JV307 $\Delta$ P <sub><i>ftdA</i></sub> ::P <sub><i>ftdA</i></sub> _JV258                                                                                                                                                                                                    | This study                |
| JV503                                                      | JV180 attB $\Phi$ C31::pJMD1-P <sub><i>ftdA</i></sub> _IFO13350- <i>xyIE</i>                                                                                                                                                                                                 | This study                |
| JV505                                                      | JV180 attB $\Phi$ C31::pJMD1-P <sub><i>ftdA</i></sub> _JV180- <i>xyIE</i>                                                                                                                                                                                                    | This study                |
| JV527                                                      | JV180 attB $\Phi$ C31::pJMD1-P <sub><i>ermE*</i></sub> _pHM11a                                                                                                                                                                                                               | This study                |
| JV1871                                                     | JV180 attB $\Phi$ C31::pJMD1-P <sub><i>ftdA</i></sub> _JV180- <i>ftdA-xyIE</i>                                                                                                                                                                                               | This study                |

|        |                                                                               |            |
|--------|-------------------------------------------------------------------------------|------------|
| JV1873 | JV180 attBΦC31::pJMD1- <i>P<sub>ftdA</sub></i> _IFO13350- <i>ftdA-xyIE</i>    | This study |
| JV1743 | IFO13350 attBΦC31::pJMD1- <i>P<sub>ftdA</sub></i> _IFO13350- <i>xyIE</i>      | This study |
| JV1745 | IFO13350 attBΦC31::pJMD1- <i>P<sub>ftdA</sub></i> _JV180- <i>xyIE</i>         | This study |
| JV1747 | IFO13350 attBΦC31::pJMD1- <i>P<sub>ermE*</sub></i> _pHM11a                    | This study |
| JV1875 | IFO13350 attBΦC31::pJMD1- <i>P<sub>ftdA</sub></i> _JV180- <i>ftdA-xyIE</i>    | This study |
| JV1877 | IFO13350 attBΦC31::pJMD1- <i>P<sub>ftdA</sub></i> _IFO13350- <i>ftdA-xyIE</i> | This study |
| JV712  | JV307 <i>P<sub>ftdA</sub></i> Δ-528_-207                                      | This study |
| JV716  | JV307 <i>P<sub>ftdA</sub></i> Δ-528_-57                                       | This study |
| JV1933 | JV307 <i>P<sub>ftdA</sub></i> Δ-528_-38                                       | This study |
| JV1836 | JV307 <i>P<sub>ftdA</sub></i> Δ-528_-31                                       | This study |
| JV1986 | JV307 <i>P<sub>ftdA</sub></i> Δ2_28                                           | This study |
| JV936  | JV307 <i>P<sub>ftdA</sub></i> Δ29_48                                          | This study |
| JV1675 | JV307 <i>P<sub>ftdA</sub></i> Δ49_68                                          | This study |
| JV1655 | JV307 <i>P<sub>ftdA</sub></i> Δ69_88                                          | This study |
| JV1680 | JV307 <i>P<sub>ftdA</sub></i> Δ89_108                                         | This study |
| JV1688 | JV307 <i>P<sub>ftdA</sub></i> Δ109_128                                        | This study |
| JV1697 | JV307 <i>P<sub>ftdA</sub></i> Δ129_148                                        | This study |
| JV1693 | JV307 <i>P<sub>ftdA</sub></i> Δ149_181                                        | This study |
| JV2084 | JV307 <i>P<sub>ftdA</sub></i> Δ-528_-31:: -35box <sub>JV254</sub>             | This study |
| JV2088 | JV307 <i>P<sub>ftdA</sub></i> Δ-528_-31:: -35box <sub>JV255</sub>             | This study |
| JV2090 | JV307 <i>P<sub>ftdA</sub></i> Δ-528_-31:: -35box <sub>JV256</sub>             | This study |
| JV2100 | JV307 <i>P<sub>ftdA</sub></i> Δ-528_-31:: -35box <sub>JV257</sub>             | This study |
| JV556  | JV307 Δ <i>adpA</i>                                                           | This study |
| JV623  | JV556 attBΦC31::pSET152- <i>adpA</i> _JV180                                   | This study |
| JV664  | JV556 attBΦC31::pSET152- <i>adpA</i> _IFO13350                                | This study |
| JV629  | JV556 attBΦC31::pJMD3- <i>adpA</i> _JV180                                     | This study |
| JV618  | JV556 attBΦC31::pJMD3- <i>adpA</i> _IFO13350                                  | This study |
| JV2111 | JV1851 Δ <i>adpA</i>                                                          | This study |
| JV938  | JV307 <i>P<sub>ftdA</sub></i> Δ29_48::IFO13350                                | This study |
| JV1553 | JV307 <i>P<sub>ftdA</sub></i> _35G/T                                          | This study |
| JV1565 | JV307 <i>P<sub>ftdA</sub></i> _37C/A                                          | This study |
| JV1555 | JV307 <i>P<sub>ftdA</sub></i> _40G/T                                          | This study |
| JV1567 | JV307 <i>P<sub>ftdA</sub></i> _42C/A                                          | This study |
| JV894  | JV307 <i>P<sub>ftdA</sub></i> ΔAG                                             | This study |
| JV1673 | JV307 <i>P<sub>ftdA</sub></i> ΔAG::CT                                         | This study |
| JV1032 | JV307 Δ <i>P<sub>ftdA</sub></i> :: <i>P<sub>ftdA</sub></i> _IFO13350+AG       | This study |
| JV564  | JV307 Δ <i>grhR2-V</i>                                                        | This study |
| JV1832 | JV307 Δ <i>grhR1-E</i>                                                        | This study |
| JV1898 | JV307 Δ <i>grhFGH</i>                                                         | This study |
| JV1698 | JV307 Δ <i>grhGH</i>                                                          | This study |
| JV1892 | JV307 Δ <i>grhI-P</i>                                                         | This study |

|        |                                           |            |
|--------|-------------------------------------------|------------|
| JV1706 | JV307 <i>ΔgrhQSAB</i>                     | This study |
| JV1854 | JV1851 <i>ΔgrhGH</i>                      | This study |
| JV2108 | JV1851 <i>ΔgrhR2-V</i>                    | This study |
| JV671  | JV564 attBΦC31::pJMD2- <i>grhR2</i>       | This study |
| JV669  | JV564 attBΦC31::pJMD2- <i>grhR3</i>       | This study |
| JV919  | JV564 attBΦC31::pJMD2- <i>grhF</i>        | This study |
| JV921  | JV564 attBΦC31::pJMD2- <i>grhG</i>        | This study |
| JV923  | JV564 attBΦC31::pJMD2- <i>grhH</i>        | This study |
| JV1070 | JV564 attBΦC31::pJMD2- <i>grhGH</i>       | This study |
| JV1054 | JV564 attBΦC31::pJMD2- <i>accBE_JV180</i> | This study |
| JV1060 | JV564 attBΦC31::pJMD2-SGR1943-44          | This study |
| JV1066 | JV564 attBΦC31::pJMD2-SGR3280-81          | This study |
| JV1018 | JV180 attBΦC31::pJMD2- <i>grhG</i>        | This study |
| JV978  | JV254 attBΦC31::pJMD2- <i>grhG</i>        | This study |
| JV982  | JV258 attBΦC31::pJMD2- <i>grhG</i>        | This study |
| JV986  | IFO13350 attBΦC31::pJMD2- <i>grhG</i>     | This study |

**Table S2. List of plasmids used in this study.**

| plasmid              | description                                                                                                                                                                                                                                                                        | source                    |
|----------------------|------------------------------------------------------------------------------------------------------------------------------------------------------------------------------------------------------------------------------------------------------------------------------------|---------------------------|
| pUC19                | <i>bla ori<sup>pUC</sup></i> cloning vector                                                                                                                                                                                                                                        | NEB                       |
| pCR2.1-TOPO          | Amp <sup>R</sup> <i>ori<sup>pBR322</sup></i> TOPO-TA cloning vector                                                                                                                                                                                                                | Invitrogen                |
| pET11a               | Amp <sup>R</sup> <i>ori<sup>pBR322</sup> lacI</i> T7 promoter protein expression vector                                                                                                                                                                                            | Novagen                   |
| pCM130               | <i>ori<sup>pBR322</sup> Tet<sup>R</sup> xylE</i> reporter gene vector                                                                                                                                                                                                              | Marx <i>et al</i> (8)     |
| pSET152              | <i>aac(3)IV oriT ori<sup>pUC</sup> int<sup>ΦC31</sup> attP<sup>ΦC31</sup></i> self-integrating vector                                                                                                                                                                              | Bierman <i>et al</i> (9)  |
| pJMD2                | Apr <sup>R</sup> <i>oriT ori<sup>colE1</sup> int<sup>ΦC31</sup> attP<sup>ΦC31</sup> P<sub>ermE*</sub></i> sequence from pDA1652                                                                                                                                                    | Ko <i>et al</i> (10)      |
| pJMD3                | pJMD2 variant with <i>P<sub>ermE*</sub></i> sequence from pHM11a                                                                                                                                                                                                                   | Ko <i>et al</i> (10)      |
| pJVD52.1             | Apr <sup>R</sup> <i>oriT ori<sup>pSG5(ts)</sup> rep<sup>pUC</sup> rpsL<sup>+</sup></i> shuttle vector                                                                                                                                                                              | Blodgett <i>et al</i> (5) |
| pJVD53               | Tsr <sup>R</sup> Amp <sup>R</sup> <i>oriT ori<sup>pJ101</sup> ori<sup>R6K</sup> nitR</i> protein expression vector                                                                                                                                                                 | Blodgett <i>et al</i> (5) |
| pJMD1                | ligation of PCR product of pSET152 (primers PXPX2 and PXPX2) digested with BamHI, SpeI and overlap extension PCR product of [pJVD53 (primers Fd-pSET and Fd-xylE) and pCM130 (primers xylE-pSET and xylE-fd)] amplified with primers PXPX2 and PXPX2, digested with BglII and XbaI | This study                |
| pJVD52.1-ΔftdA-F     | ligation of pJVD52.1 and overlap extension PCR products of JV180 (primers YQ82-180PTM_us_f and YQ91-180PTM_us_o_v2; YQ84-180PTM_ds_f and YQ85-180PTM_ds_r), both digested with XbaI and HindIII                                                                                    | This study                |
| pUC19-ΔPftdA::tsr    | gibson assembly of PCR products of pUC19 (primers YQ268-pUC19-us and YQ269-pUC19-ds), JV180 (primers YQ211-180DPro-us-f and YQ212-180DPro-us-r; YQ213-180DPro-ds-f and YQ214-180DPro-ds-r), and pJVD53 (primers YQ215-tsr-f and YQ216-tsr-r)                                       | This study                |
| pUC19-ΔPftdA::PermE* | gibson assembly of PCR products of pUC19 (primers YQ268-pUC19-us and YQ269-pUC19-ds), JV180 (primers YQ211-180DPro-us-f and YQ212-180DPro-us-r; YQ213-180DPro-ds-f and YQ214-180DPro-ds-r), and pJMD2 (primers YQ243-DPro-ermEh-r and YQ258-DPro-ermEh-f-v2)                       | This study                |
| pUC19-ΔPftdA::P13350 | gibson assembly of PCR products of pUC19 (primers YQ268-pUC19-us and YQ269-pUC19-ds), JV180 (primers YQ211-180DPro-us-f and YQ212-180DPro-us-r; YQ213-180DPro-ds-f and YQ214-180DPro-ds-r), and IFO13350 (primers YQ249-DPro-158-r and YQ259-DPro-158-f-v2)                        | This study                |
| pUC19-ΔPftdA::P251   | gibson assembly of PCR products of pUC19 (primers YQ268-pUC19-us and YQ269-pUC19-ds), JV180 (primers YQ211-180DPro-us-f and YQ212-180DPro-us-r; YQ213-180DPro-ds-f and YQ214-180DPro-ds-r), and JV251 (primers YQ231-DPro-180-r and YQ260-Dpro-25123-f-v2)                         | This study                |
| pUC19-ΔPftdA::P252   | gibson assembly of PCR products of pUC19 (primers YQ268-pUC19-us and YQ269-pUC19-ds), JV180 (primers YQ211-180DPro-us-f and YQ212-180DPro-us-r; YQ213-180DPro-ds-f and YQ214-180DPro-ds-r), and JV252 (primers YQ231-DPro-180-r and YQ260-Dpro-25123-f-v2)                         | This study                |
| pUC19-ΔPftdA::P253   | gibson assembly of PCR products of pUC19 (primers YQ268-pUC19-us and YQ269-pUC19-ds), JV180 (primers YQ211-180DPro-us-f and YQ212-180DPro-us-r; YQ213-180DPro-ds-f and YQ214-180DPro-ds-r), and JV253 (primers YQ231-DPro-180-r and YQ260-Dpro-25123-f-v2)                         | This study                |
| pUC19-ΔPftdA::P254   | gibson assembly of PCR products of pUC19 (primers YQ268-pUC19-us and YQ269-pUC19-ds), JV180 (primers YQ211-180DPro-us-f and YQ212-180DPro-us-r; YQ213-180DPro-ds-f and YQ214-180DPro-ds-r), and JV254 (primers YQ252-DPro-254-r and YQ261-DPro-254-f-v2)                           | This study                |
| pUC19-ΔPftdA::P255   | gibson assembly of PCR products of pUC19 (primers YQ268-pUC19-us and YQ269-pUC19-ds), JV180 (primers YQ211-180DPro-us-f and YQ212-180DPro-us-r; YQ213-180DPro-ds-f and YQ214-180DPro-ds-r), and JV255 (primers YQ254-DPro-255-r and YQ262-DPro-255-f-v2)                           | This study                |
| pUC19-ΔPftdA::P256   | gibson assembly of PCR products of pUC19 (primers YQ268-pUC19-us and YQ269-pUC19-ds), JV180 (primers YQ211-180DPro-us-f and YQ212-180DPro-us-r; YQ213-180DPro-ds-f and YQ214-180DPro-ds-r), and JV256 (primers YQ256-DPro-2568-r and YQ263-DPro-2568-f-v2)                         | This study                |
| pUC19-ΔPftdA::P257   | gibson assembly of PCR products of pUC19 (primers YQ268-pUC19-us and YQ269-pUC19-ds), JV180 (primers YQ211-180DPro-us-f and YQ212-180DPro-us-r; YQ213-180DPro-ds-f and YQ214-180DPro-ds-r), and JV257 (primers YQ249-DPro-158-r and YQ264-DPro-257-f-v2)                           | This study                |
| pUC19-ΔPftdA::P258   | gibson assembly of PCR products of pUC19 (primers YQ268-pUC19-us and YQ269-pUC19-ds), JV180 (primers YQ211-180DPro-us-f and YQ212-180DPro-us-r; YQ213-180DPro-ds-f and YQ214-180DPro-ds-r), and JV258 (primers YQ256-DPro-2568-r and YQ263-DPro-2568-f-v2)                         | This study                |



|                                        |                                                                                                                                                                                                                                                   |                      |
|----------------------------------------|---------------------------------------------------------------------------------------------------------------------------------------------------------------------------------------------------------------------------------------------------|----------------------|
| pJVD52.1-<br>ΔPftdA::tsr               | ligation of pJVD52.1 and pUC19-ΔPftdA::tsr, both digested with XbaI and HindIII                                                                                                                                                                   | This study           |
| pJVD52.1-<br>ΔPftdA::PermE*            | ligation of pJVD52.1 and pUC19-ΔPftdA::PermE*, both digested with XbaI and HindIII                                                                                                                                                                | This study           |
| pJVD52.1-<br>ΔPftdA::P13350            | ligation of pJVD52.1 and pUC19-ΔPftdA::P13350, both digested with XbaI and HindIII                                                                                                                                                                | This study           |
| pJVD52.1-<br>ΔPftdA::P251              | ligation of pJVD52.1 and pUC19-ΔPftdA::P251, both digested with XbaI and HindIII                                                                                                                                                                  | This study           |
| pJVD52.1-<br>ΔPftdA::P252              | ligation of pJVD52.1 and pUC19-ΔPftdA::P252, both digested with XbaI and HindIII                                                                                                                                                                  | This study           |
| pJVD52.1-<br>ΔPftdA::P253              | ligation of pJVD52.1 and pUC19-ΔPftdA::P253, both digested with XbaI and HindIII                                                                                                                                                                  | This study           |
| pJVD52.1-<br>ΔPftdA::P254              | ligation of pJVD52.1 and pUC19-ΔPftdA::P254, both digested with XbaI and HindIII                                                                                                                                                                  | This study           |
| pJVD52.1-<br>ΔPftdA::P255              | ligation of pJVD52.1 and pUC19-ΔPftdA::P255, both digested with XbaI and HindIII                                                                                                                                                                  | This study           |
| pJVD52.1-<br>ΔPftdA::P256              | ligation of pJVD52.1 and pUC19-ΔPftdA::P256, both digested with XbaI and HindIII                                                                                                                                                                  | This study           |
| pJVD52.1-<br>ΔPftdA::P257              | ligation of pJVD52.1 and pUC19-ΔPftdA::P257, both digested with XbaI and HindIII                                                                                                                                                                  | This study           |
| pJVD52.1-<br>ΔPftdA::P258              | ligation of pJVD52.1 and pUC19-ΔPftdA::P258, both digested with XbaI and HindIII                                                                                                                                                                  | This study           |
| pJMD1-<br>PermE*_pHM11a-<br>xylE       |                                                                                                                                                                                                                                                   | Qi <i>et al</i> (11) |
| pJMD1-<br>PftdA_JV180-xylE             | ligation of pJMD1 and overlap extension PCR product of [pJMD1 (primers YQ67-XylE-fw and xylE-REV) and JV180 (primers YQ50-P180-overlap-r and YQ51-P180-overlap-f)], both digested with Ascl and HpaI                                              | This study           |
| pJMD1-<br>PftdA_IFO13350-<br>xylE      | ligation of pJMD1 and overlap extension PCR product of [pJMD1 (primers YQ67-XylE-fw and xylE-REV) and JV180 (primers YQ69-P13350-overlap-r and YQ70-P13350-overlap-f)], both digested with Ascl and HpaI                                          | This study           |
| pJMD1-<br>PftdA_JV180-ftdA-<br>xylE    | gibson assembly of PCR products of pJMD1 (primers YQ67-XylE-f and YQ177-pXylE-r) and JV180 (YQ501-P180-ftdA-xylE-f and YQ502-PftdA-ftdA-xylE-r)                                                                                                   | This study           |
| pJMD1-<br>PftdA_IFO13350-<br>ftdA-xylE | gibson assembly of PCR products of pJMD1 (primers YQ67-XylE-f and YQ177-pXylE-r) and pUC19-ΔPftdA::P13350 (YQ503-P13350-ftdA-xylE-f and YQ502-PftdA-ftdA-xylE-r)                                                                                  | This study           |
| pUC19-ΔadpA                            | ligation of pUC19 and overlap extension PCR product of JV180 (primers YQ180-DadpA-u-f-xbaI and YQ189-DadpA-us-r-2; YQ190-DadpA-d-f-o-3 and YQ169-DadpA-d-r-h-2), both digested with XbaI and HindIII                                              | This study           |
| pJVD52.1-ΔadpA                         | ligation of pJVD52.1 and pUC19-ΔadpA, both digested with XbaI and HindIII, for the construction of the ΔadpA mutant                                                                                                                               | This study           |
| pSET152-<br>adpA_13350                 | ligation of pSET152 and the PCR product of IFO13350 (primers YQ225-adpA-f-xbaI and YQ226-adpA-r-bamHI), both digested with BamHI and XbaI                                                                                                         | This study           |
| pSET152-adpA_180                       | ligation of pSET152 and the PCR product of JV180 (primers YQ225-adpA-f-xbaI and YQ226-adpA-r-bamHI), both digested with BamHI and XbaI                                                                                                            | This study           |
| pJMD3-<br>adpA_13350                   | ligation of pJMD3 and the PCR product of IFO13350 (primers YQ119-AdpA_fw_n and YQ120-AdpA_rv1_x), both digested with NdeI and XbaI                                                                                                                | This study           |
| pJMD3-adpA_180                         | ligation of pJMD3 and the PCR product of JV180 (primers YQ119-AdpA_fw_n and YQ121-AdpA_rv2_x), both digested with NdeI and XbaI                                                                                                                   | This study           |
| pUC19-PftdA-Δ-<br>528_-307             | gibson assembly of PCR product of pUC19 (primers YQ268-pUC19-us and YQ269-pUC19-ds), PCR products of JV180 (primers YQ211-180DPro-us-f and YQ265-Dpro-us-r-v2; YQ231-DPro-180-r and YQ229-Dpro-D500-f; YQ213-180DPro-ds-f and YQ214-180DPro-ds-r) | This study           |
| pJVD52.1-PftdA-Δ-<br>528_-307          | ligation of pJVD52.1 and pUC19-PftdA-Δ-528_-307, both digested with XbaI and HindIII                                                                                                                                                              | This study           |
| pJVD52.1-PftdA-Δ-<br>528_-207          | ligation of pJVD52.1-PftdA-Δ-528_-307 and PCR product of JV180 (primers YQ237-Dpro-ds-ncol-r and YQ232-Dpro-D400-f), both digested with SpeI and NcoI                                                                                             | This study           |

|                                 |                                                                                                                                                                                                                                                                                                                                                         |            |
|---------------------------------|---------------------------------------------------------------------------------------------------------------------------------------------------------------------------------------------------------------------------------------------------------------------------------------------------------------------------------------------------------|------------|
| pJVD52.1-PftdA-Δ-528_-57        | ligation of pJVD52.1-PftdA-Δ-528_-307 and PCR product of JV180 (primers YQ237-Dpro-ds-ncol-r and YQ234-Dpro-D250-f), both digested with SpeI and NcoI                                                                                                                                                                                                   | This study |
| pUC19-PftdA-ΔAG                 | gibson assembly of PCR product of pUC19 (primers YQ268-pUC19-us and YQ269-pUC19-ds), PCR products of JV180 (primers YQ211-180DPro-us-f and YQ265-Dpro-us-r-v2; YQ213-180DPro-ds-f and YQ214-180DPro-ds-r), and overlap extension PCR product of JV180 (primers YQ238-Dpro-DAG-r and YQ260-Dpro-25123-f-v2; YQ231-DPro-180-r and YQ229-Dpro-D500-f)      | This study |
| pUC19-PftdA-ΔAG::CT             | gibson assembly of PCR products of pUC19 (primers YQ268-pUC19-us and YQ269-pUC19-ds) and JV180 (primers YQ211-180DPro-us-f and YQ390-180PTM-dAG-CT-r; YQ389-180PTM-dAG-CT-f and YQ214-180DPro-ds-r)                                                                                                                                                     | This study |
| pUC19-PftdA-Δ29-48              | gibson assembly of PCR product of pUC19 (primers YQ268-pUC19-us and YQ269-pUC19-ds), PCR products of JV180 (primers YQ211-180DPro-us-f and YQ265-Dpro-us-r-v2; YQ213-180DPro-ds-f and YQ214-180DPro-ds-r), and overlap extension PCR product of JV180 (primers YQ239-Dpro-DadpA-r and YQ260-Dpro-25123-f-v2; YQ231-DPro-180-r and YQ229-Dpro-D500-f)    | This study |
| pUC19-PftdA-Δ29-48::IFO13350    | gibson assembly of PCR product of pUC19 (primers YQ268-pUC19-us and YQ269-pUC19-ds), PCR products of JV180 (primers YQ211-180DPro-us-f and YQ265-Dpro-us-r-v2; YQ213-180DPro-ds-f and YQ214-180DPro-ds-r), and overlap extension PCR product of JV180 (primers YQ240-Dpro-DadpA158-r and YQ260-Dpro-25123-f-v2; YQ231-DPro-180-r and YQ229-Dpro-D500-f) | This study |
| pUC19-ΔPftdA::P13350+AG         | gibson assembly of PCR products of pUC19 (primers YQ268-pUC19-us and YQ269-pUC19-ds) and pUC19-ΔPftdA::P13350 (primers YQ211-180DPro-us-f and YQ407-P158+AG-us-r; YQ340-P254+AG-ds-f and YQ214-180DPro-ds-r)                                                                                                                                            | This study |
| pJVD52.1-PftdA-ΔAG              | ligation of pJVD52.1 and pUC19-PftdA-ΔAG, both digested with XbaI and HindIII                                                                                                                                                                                                                                                                           | This study |
| pJVD52.1-PftdA-ΔAG::CT          | ligation of pJVD52.1 and pUC19-PftdA-ΔAG::CT, both digested with XbaI and HindIII                                                                                                                                                                                                                                                                       | This study |
| pJVD52.1-PftdA-Δ29_48           | ligation of pJVD52.1 and pUC19-PftdA-Δ29-48, both digested with XbaI and HindIII                                                                                                                                                                                                                                                                        | This study |
| pJVD52.1-PftdA-Δ29_48::IFO13350 | ligation of pJVD52.1 and pUC19-PftdA-Δ29-48::IFO13350, both digested with XbaI and HindIII                                                                                                                                                                                                                                                              | This study |
| pUC19-ΔPftdA::P13350+AG         | ligation of pJVD52.1 and pUC19-ΔPftdA::P13350+AG, both digested with XbaI and HindIII                                                                                                                                                                                                                                                                   | This study |
| pUC19-ΔgrhR2-V                  | ligation of pUC19 and overlap extension PCR product of JV180 (primers YQ183-Dgrh-us-r-3 and YQ191-Dgrh-us-f-x-4; YQ184-Dgrh-ds-f-o-2 and YQ163-Dgrh-ds-r-hindIII), both digested with XbaI and HindIII                                                                                                                                                  | This study |
| pJVD52.1-ΔgrhR2-V               | ligation of pJVD52.1 and pUC19-ΔgrhR2-V, both digested with XbaI and HindIII                                                                                                                                                                                                                                                                            | This study |
| pUC19-ΔgrhGH                    | gibson assembly of PCR products of pUC19 (primers YQ268-pUC19-us and YQ269-pUC19-ds) and JV180 (primers YQ466-grhGdel-u-f and YQ467-grhGdel-u-r; YQ469-grhGHdel-d-r and YQ473-grhGHdel-d-f)                                                                                                                                                             | This study |
| pUC19-ΔgrhQSAB                  | gibson assembly of PCR products of pUC19 (primers YQ268-pUC19-us and YQ269-pUC19-ds) and JV180 (primers YQ485-grhQdel-u-f and YQ486-grhQdel-u-r; YQ487-grhBdel-d-f and YQ488-grhBdel-d-r)                                                                                                                                                               | This study |
| pJVD52.1-ΔgrhGH                 | ligation of pJVD52.1 and pUC19-ΔgrhGH, both digested with XbaI and HindIII                                                                                                                                                                                                                                                                              | This study |
| pJVD52.1-ΔgrhQSAB               | ligation of pJVD52.1 and pUC19-ΔgrhQSAB, both digested with XbaI and HindIII                                                                                                                                                                                                                                                                            | This study |
| pJMD2-grhR2                     | ligation of pJMD2 and the PCR product of JV180 (primers YQ244-grhR2-f-n and YQ245-grhR2-r-x), both digested with NdeI and XbaI                                                                                                                                                                                                                          | This study |
| pJMD2-grhR3                     | ligation of pJMD2 and the PCR product of JV180 (primers YQ246-grhR3-f-n and YQ247-grhR3-f-r), both digested with NdeI and XbaI                                                                                                                                                                                                                          | This study |
| pJMD2-grhF                      | ligation of pJMD2 and the PCR product of JV180 (primers YQ286-grhF-f-n and YQ287-grhF-r-x), both digested with NdeI and XbaI                                                                                                                                                                                                                            | This study |
| pJMD2-grhG                      | ligation of pJMD2 and the PCR product of JV180 (primers YQ288-grhG-f-n and YQ289-grhG-r-x), both digested with NdeI and XbaI                                                                                                                                                                                                                            | This study |
| pJMD2-grhH                      | ligation of pJMD2 and the PCR product of JV180 (primers YQ294-grhH-f-n and YQ295-grhH-r-x), both digested with NdeI and XbaI                                                                                                                                                                                                                            | This study |
| pJMD2-grhGH                     | ligation of pJMD2 and the PCR product of JV180 (primers YQ288-grhG-f-n and YQ295-grhH-r-x), both digested with NdeI and XbaI                                                                                                                                                                                                                            | This study |

|                           |                                                                                                                                                                                                                       |            |
|---------------------------|-----------------------------------------------------------------------------------------------------------------------------------------------------------------------------------------------------------------------|------------|
| pJMD2-accBE-180           | ligation of pJMD2 and the PCR product of JV180 (primers YQ351-180accB-f and YQ354-180accE-r), both digested with NdeI and XbaI                                                                                        | This study |
| pJMD2-SGR1943-44          | ligation of pJMD2 and the PCR product of IFO13350 (primers YQ355-158accB-f and YQ358-158accE-r), both digested with NdeI and XbaI                                                                                     | This study |
| pJMD2-SGR3281-80          | ligation of pJMD2 and the PCR product of IFO13350 (primers YQ359-3281-f and YQ362-3280-r), both digested with NdeI and XbaI                                                                                           | This study |
| pKN001                    | gibson assembly of pJVD52.1 digested with BamHI and HindIII and PCR products of JV180 (primers G35T-us-F and G35T-us-R; G35T-ds-F and G35T-ds-R) for construction of the PftdA-AdpAo::G35T point mutant               | This study |
| pKN002                    | gibson assembly of pJVD52.1 digested with BamHI and HindIII and PCR product of JV180 (primers G40T-us-F and G40T-us-R; G40T-ds-F and G40T-ds-R) for construction of the PftdA-AdpAo::G40T point mutant                | This study |
| pKN003                    | gibson assembly of pJVD52.1 digested with BamHI and HindIII and PCR product of JV180 (primers C37A-us-F and C37A-us-R; C37A-ds-F and C37A-ds-R) for construction of the PftdA-AdpAo::C37A point mutant                | This study |
| pKN004                    | gibson assembly of pJVD52.1 digested with BamHI and HindIII and PCR product of JV180 (primers C42A-us-F and C42A-us-R; C42A-ds-F and C42A-ds-R) for construction of the PftdA-AdpAo::C42A point mutant                | This study |
| pKN012                    | gibson assembly of pJVD52.1 digested with BamHI and HindIII and PCR product of JV180 (primers 69-88-us-F and 69-88-us-R; 69-88-ds-F and 69-88-ds-R) for construction of the PftdAΔ(69_88) mutant                      | This study |
| pKN015                    | gibson assembly of pJVD52.1 digested with BamHI and HindIII and PCR product of JV180 (primers 49-68-us-F and 49-68-us-R; 49-68-ds-F and 49-68-ds-R) for construction of the PftdAΔ(49_68) mutant                      | This study |
| pKN016                    | gibson assembly of pJVD52.1 digested with BamHI and HindIII and PCR product of JV180 (primers 89-108-us-F and 89-108-us-R; 89-108-ds-F and 89-108-ds-R) for construction of the PftdAΔ(89_108) mutant                 | This study |
| pKN017                    | gibson assembly of pJVD52.1 digested with BamHI and HindIII and PCR product of JV180 (primers 129-148-us-F and 129-148-us-R; 129-148-ds-F and 129-148-ds-R) for construction of the PftdAΔ(129_148) mutant            | This study |
| pKN018                    | gibson assembly of pJVD52.1 digested with BamHI and HindIII and PCR product of JV180 (primers 109-128-us-F and 109-128-us-R; 109-128-ds-F and 109-128-ds-R) for construction of the PftdAΔ(109_128) mutant            | This study |
| pKN019                    | gibson assembly of pJVD52.1 digested with BamHI and HindIII and PCR product of JV180 (primers 149-181-us-F and 149-181-us-R; 149-181-ds-F and 149-181-ds-R) for construction of the PftdAΔ(149_181) mutant            | This study |
| pKN027                    | gibson assembly of pJVD52.1 digested with BamHI and HindIII and PCR product of JV180 (primers grhR1-grhE-us-F and grhR1-grhE-us-R; grhR1-grhE-ds-F and grhR1-grhE-ds-R) for construction of the ΔgrhR1-E mutant       | This study |
| pKN028                    | gibson assembly of pJVD52.1 digested with BamHI and HindIII and PCR product of JV180 (primers -528--31-us-F and -528--31-us-R; -528--31-ds-F and -528--31-ds-R) for construction of the PftdAΔ(-528_-31) mutant       | This study |
| pKN029                    | gibson assembly of pJVD52.1 digested with BamHI and HindIII and PCR product of JV180 (primers grhF-grhH-us-F and grhF-grhH-us-R; grhF-grhH-ds-F and grhF-grhH-ds-R) for construction of the ΔgrhFGH mutant            | This study |
| pKN030                    | gibson assembly of pJVD52.1 digested with BamHI and HindIII and PCR product of JV180 (primers grhI-grhP-us-F and grhI-grhP-us-R; grhI-grhP-ds-F and grhI-grhP-ds-R) for construction of the ΔgrhI-P mutant            | This study |
| pKN031                    | gibson assembly of pJVD52.1 digested with BamHI and HindIII and PCR product of JV180 (primers -528--38-us-F and -528--38-us-R; -528--38-ds-F and -528--38-ds-R) for construction of the PftdAΔ(-528_-38) point mutant | This study |
| pUC19-JV180-ΔPftdA::PCM02 | gibson assembly of the PCR products of pUC19-JV180-ΔPftdA::tsr (primers BE277-PftdA500 bp-F and BE277-PftdA500 bp-R1) and SP18CM02 (primers CM02-PftdA500 bp-F and CM02-PftdA500 bp-R)                                | This study |
| pKN038                    | ligation of pJVD52.1 and pUC19-JV180-ΔPftdA::PCM02, both digested with HindIII and XbaI                                                                                                                               | This study |

|        |                                                                                                                                                                                                                |            |
|--------|----------------------------------------------------------------------------------------------------------------------------------------------------------------------------------------------------------------|------------|
| pKN040 | gibson assembly of pJVD52.1 digested with BamHI and HindIII and PCR products of JV180 (primers 2-28-us-F and 2-28-us-R; 2-28-ds-F and 2-28-ds-R) for construction of the PftdAΔ(2-28) point mutant             | This study |
| pKN047 | gibson assembly of pJVD52.1 digested with BamHI and HindIII and PCR products of JV180 (primers -35JV254-us-F and -35JV254-us-R; -35JV254-ds-F and -35JV254-ds-R) for insertion of -35 box from JV254 in JV1836 | This study |
| pKN048 | gibson assembly of pJVD52.1 digested with BamHI and HindIII and PCR products of JV180 (primers -35JV255-us-F and -35JV255-us-R; -35JV255-ds-F and -35JV255-ds-R) for insertion of -35 box from JV255 in JV1836 | This study |
| pKN049 | gibson assembly of pJVD52.1 digested with BamHI and HindIII and PCR products of JV180 (primers -35JV256-us-F and -35JV256-us-R; -35JV256-ds-F and -35JV256-ds-R) for insertion of -35 box from JV256 in JV1836 | This study |
| pKN050 | gibson assembly of pJVD52.1 digested with BamHI and HindIII and PCR products of JV180 (primers -35JV257-us-F and -35JV257-us-R; -35JV257-ds-F and -35JV257-ds-R) for insertion of -35 box from JV257 in JV1836 | This study |
| pKN052 | ligation of pET11a and the PCR product of JV180 (primers pET11a-AdpA-F and pET11a-AdpA-R), both digested with NdeI and NheI                                                                                    | This study |

**Table S3. List of oligonucleotides used in this study.**

| name                     | Sequence (5' to 3')                                                 | description                                                    |
|--------------------------|---------------------------------------------------------------------|----------------------------------------------------------------|
| PXPX2                    | AGATTACAACACTAGTGATTACACGCTCACTGCCCGCTTTCC                          | Construction of pJMD1                                          |
| PXPF2                    | AGATTACAGGATCCGATTACATTACCCGCAGGACATATCCACGC                        |                                                                |
| Fd-pSET                  | AGATCTAAGCGGCCTTTGACTCCC                                            |                                                                |
| Fd-xylE                  | CTTTGTTTCATGGCGCGCCTCGTCTTCCAGACGTTAGTAAATGAATTTCT                  |                                                                |
| xylE-pSET                | TCTAGAGTTAACTCAGGTGAGCACGGTCATGAATC                                 |                                                                |
| xylE-fd                  | GGAAAGACGAGGCGGCCATGAACAAAGGTGTAATGCGACCGG                          |                                                                |
| PXFP2                    | AGATTACAGGATCCGATTACATTACCCGCAGGACATATCCACGC                        |                                                                |
| PXXP2                    | AGATTACAACACTAGTGATTACACGCTCACTGCCCGCTTTCC                          |                                                                |
| YQ4-Sg_rpsL_f            | CACGAACGGCACACAGAAAC                                                |                                                                |
| YQ5-Sg_rpsL_r            | GATGATGACCGGGCGCTTC                                                 |                                                                |
| YQ82-180PTM_us_f         | ATGTTGGCGTCGTGGTCCAGC                                               | PCR upstream homology region (us) for $\Delta$ <i>ftdA-F</i>   |
| YQ91-180PTM_us_r_v2      | TCAACCGGCTGCACGACGGGACCGTGCACGACTGGTGAGACCCCATC<br>GGCCAGATCATC     |                                                                |
| YQ84-180PTM_ds_f         | TCACCAGTCGTGCACGGTCCC                                               | PCR downstream homology region (ds) for $\Delta$ <i>ftdA-F</i> |
| YQ85-180PTM_ds_r         | GTCGCTGTACCGGGGCGCGTA                                               |                                                                |
| YQ38-180PTM_us_f1153     | TCTCCGGTCACCGSGTCGAA                                                | verify $\Delta$ <i>ftdA-F</i> plasmid and mutant               |
| YQ42-180PTM_ds_r1155     | GRGARCTGGCSGTCGTCAGC                                                |                                                                |
| YQ113-180PTM_us_f326     | ACTAAGGAATGTCCCGCCAG                                                |                                                                |
| YQ114-180PTM_ds_r203     | CACGCCTACACCTTACCGAC                                                |                                                                |
| YQ268-pUC19-us           | TCTAGAGGATCCCCGGGTAC                                                |                                                                |
| YQ269-pUC19-ds           | AAGCTTGGCGTAATCATGGTC                                               |                                                                |
| YQ211-180DPro_us_f       | GGCCAGTGAATTCGAGCTCGGTACCCGGGGATCCTCTAGAGGGCCG<br>AAGAACTTGATCG     | PCR us for JV180 $P_{ftdA}$ replacement                        |
| YQ265-Dpro_us_r_v2       | CACCCCGCGGTTCCCCGTCGAG                                              |                                                                |
| YQ213-180DPro_ds_f       | ATGAACGAGCGGAACCATC                                                 | PCR ds for JV180 $P_{ftdA}$ replacement                        |
| YQ214-180DPro_ds_r       | TCACACAGGAAACAGCTATGACCATGATTACGCCAAGCTTGGTTGTTCC<br>ACGTCGGCCATG   |                                                                |
| YQ215- <i>tsr</i> _f     | GGCCGGTGGAGGGCTCCGGCGAAGGGCTCTGGCGAAGCTCATCAAG<br>GCGAATACTTCATATGC | PCR <i>tsr</i> for JV180 $P_{ftdA}$ replacement plasmid        |
| YQ216- <i>tsr</i> _r     | AATGGTTTTCGCCATCGGCGGATGGTTCGCGCTCGTTCATCGAGGAA<br>CAGAGGCGCTTATC   |                                                                |
| YQ217- <i>tsr</i> _int_f | TCATTCGGGACAGCGGTATG                                                | verify $\Delta$ $P_{ftdA}::tsr$ replacement                    |
| YQ218- <i>tsr</i> _int_r | GACCTCGATGAACTCCACCC                                                |                                                                |

|                               |                                                                     |                                                                     |
|-------------------------------|---------------------------------------------------------------------|---------------------------------------------------------------------|
| YQ219-180DPro_us_out          | CCATCATCTCGTAGGGCAGC                                                | verify JV180 $P_{ftdA}$ replacement                                 |
| YQ36-180PTM_us_f38            | GGACGTCGTACGACAAGGRGG                                               |                                                                     |
| YQ221-180DPro_ds_out          | GAAGCCGTCGATGTATCCGC                                                |                                                                     |
| YQ222-180DPro_ds_int          | AGCAGAAGAACGGGATAGGC                                                |                                                                     |
| YQ229-Dpro_D500_f             | GGAAGTGTGCGCGCACCCGCGGACGTCGTACGACAACTAGTCCGTCGGGCCGGTGGAG          | PCR truncated JV180 $P_{ftdA}$                                      |
| YQ232-Dpro_D400_f             | GAGAGAACTAGTTGCGTGCGCCTCCGCGCTC                                     |                                                                     |
| YQ234-Dpro_D250_f             | GAGAGAACTAGTCGGATATTTTGTATGAGCAAG                                   |                                                                     |
| YQ237-Dpro_ds_r               | ACCGCTACGAGGAGCTGTG                                                 |                                                                     |
| YQ260-Dpro_25123_f_v2         | GGCGCGGGCCGGGGCGGCTCGACGGGGAACCGCGGGGTGACTAGTCCGTCGGGCCGGTGGAGGGCTC | PCR JV251-JV253 $P_{ftdA}$ for JV180 $P_{ftdA}$ replacement         |
| YQ231-DPro_25123_r            | AATGGTTTTCGCCATCGGCGGATGGTTCGCGCTCGTTCATCGGTGACCCTCCACGAGAGT        |                                                                     |
| YQ258-DPro_ermEh_f_v2         | GGCGCGGGCCGGGGCGGCTCGACGGGGAACCGCGGGGTGACTAGTAGCCCGACCCGAGCACGC     | PCR $P_{ermE^*}$ for JV180 $P_{ftdA}$ replacement                   |
| YQ243-DPro_ermEh_r            | AATGGTTTTCGCCATCGGCGGATGGTTCGCGCTCGTTCATATGGGTCCCTCTGTGGAGTG        |                                                                     |
| YQ261-DPro_254_f_v2           | GGCGCGGGCCGGGGCGGCTCGACGGGGAACCGCGGGGTGACTAGTGGCGGAAGGAGCCCGGAGTC   | PCR JV254 $P_{ftdA}$ for JV180 $P_{ftdA}$ replacement               |
| YQ252-DPro_254_r              | ATGGTTTTCGCCATCGGCGGATGGTTCGCGCTCGTTCATAGGTGACCCACAAGGGAAC          |                                                                     |
| YQ262-DPro_255_f_v2           | GGCGCGGGCCGGGGCGGCTCGACGGGGAACCGCGGGGTGACTAGTGGCGGAGCCCTCCGCGGAAG   | PCR JV255 $P_{ftdA}$ for JV180 $P_{ftdA}$ replacement               |
| YQ254-DPro_255_r              | ATGGTTTTCGCCATCGGCGGATGGTTCGCGCTCGTTCATACGTGACCCACAAGGGAAC          |                                                                     |
| YQ263-DPro_2568_f_v2          | GGCGCGGGCCGGGGCGGCTCGACGGGGAACCGCGGGGTGACTAGTAGGCGTGGGGCCGGTCCGGG   | PCR JV256, JV258 $P_{ftdA}$ for JV180 $P_{ftdA}$ replacement        |
| YQ256-DPro_2568_r             | ATGGTTTTCGCCATCGGCGGATGGTTCGCGCTCGTTCATCCGTGACCCCTCCGCAAGTGAC       |                                                                     |
| YQ259-DPro_13350_f_v2         | GGCGCGGGCCGGGGCGGCTCGACGGGGAACCGCGGGGTGACTAGTACTCCCCGGCCCGGAGGCG    | PCR IFO13350 $P_{ftdA}$ for JV180 $P_{ftdA}$ replacement            |
| YQ264-DPro_257_f_v2           | GGCGCGGGCCGGGGCGGCTCGACGGGGAACCGCGGGGTGACTAGTCACTTGCCGGCACGGGAGGC   | PCR JV257 $P_{ftdA}$ for JV180 $P_{ftdA}$ replacement               |
| YQ249-DPro_13350_r            | AATGGTTTTCGCCATCGGCGGATGGTTCGCGCTCGTTCATCCGTGACCCCTCCACAAGTG        | PCR IFO13350 and JV257 $P_{ftdA}$ for JV180 $P_{ftdA}$ replacement  |
| YQ238-Dpro_DAG_r              | TTCGGATCATTCCGGCCGTGACGTGAACCGATGCCCCGACCCCATCGGCCAGATCATC          | PCR $P_{ftdA}$ $\Delta$ AG for $P_{ftdA}$ editing plasmid           |
| YQ389-180PTM-dAG_CT-f         | GGGCATCGGTTACGTCACG                                                 | PCR $P_{ftdA}$ $\Delta$ AG::CT for $P_{ftdA}$ editing plasmid       |
| YQ390-180PTM-dAG_CT-r         | CTTCGGATCATTCCGGCCGTGACGTGAACCGATGCCCCAGGACCCATCGGCCAGATC           |                                                                     |
| YQ239- $\Delta$ 29_48_r       | GCACCACACTGACCGATTCCCGACGCCCGGCTTCGGATCCGATGCCCCCTGACCCCATC         | PCR $P_{ftdA}$ $\Delta$ 29_48 for $P_{ftdA}$ editing plasmid        |
| YQ240- $\Delta$ 29_48_13350_r | ACTGACCGATTCCCGACGCCCGGCTTCGGATCAATGCGGCCGTGGCGTGAACCGATGCC         | PCR $P_{ftdA}$ $\Delta$ 29_48::13350 for $P_{ftdA}$ editing plasmid |

|                          |                                                                 |                                                                        |
|--------------------------|-----------------------------------------------------------------|------------------------------------------------------------------------|
| YQ67-xylE-f              | ATGAACAAAGGTGTAATGCG                                            | Amplification of <i>xylE</i> , <i>xylE</i> reporter plasmid            |
| xylE-REV                 | CAGTGAGCTGTTAACCAGGTGAGCACGGTCATGAATCG                          | Amplification of <i>xylE</i>                                           |
| YQ177-pXylE-rv           | TCGTCTTCCAGACGTTAG                                              | Amplification of <i>xylE</i> reporter plasmid                          |
| YQ123-pXylE-MCS-f        | TCTCACTCCGCTGAAACTGT                                            | checking clone into <i>xylE</i> reporter plasmid                       |
| YQ371-PXS6               | GGCCGATTCATTAATGCAGC                                            |                                                                        |
| YQ50-P180-overlap-r      | ATGGCCCGGTGCGCATTACACCTTTGTTTCATCGGTGACCCTCCACGAGAGTTC          | PCR JV180 $P_{ftdA}$ for <i>xylE</i> reporter plasmid                  |
| YQ51-P180-overlap-f      | GAGGCGCGCCGAGAAGGGTTCGGCGAAGCTC                                 |                                                                        |
| YQ69-P13350-overlap-r    | ATGGCCCGGTGCGCATTACACCTTTGTTTCATCCGTGACCCTCCACAAGTG             | PCR IFO13350 $P_{ftdA}$ for <i>xylE</i> reporter plasmid               |
| YQ70-P13350-overlap-f    | GAGGCGCGCCGAGGCTTCGGGGGCGCTATTC                                 |                                                                        |
| YQ501-P180-ftdA-xylE-f   | CATACAGAAAATTCATTTACTAACGTCTGAAAGACGACCCTCGGGCCGCTGGAGGGCTC     | PCR JV180 $P_{ftdA}$ - <i>ftdA</i> for <i>xylE</i> reporter plasmid    |
| YQ503-P13350-ftdA-xylE-f | CATACAGAAAATTCATTTACTAACGTCTGAAAGACGAACTCCCCGGCCCCGGGAGGCG      | PCR IFO13350 $P_{ftdA}$ - <i>ftdA</i> for <i>xylE</i> reporter plasmid |
| YQ502-PftdA-ftdA-xylE-r  | ACGCAGCTGCACATGGCCCGGTGCGCATTACACCTTTGTTTCATGCGAAC TCCTAGATCGTC | PCR $P_{ftdA}$ - <i>ftdA</i> for <i>xylE</i> reporter plasmid          |
| YQ495-xylE-q-507         | CAAGGTGCTCGGTTTCTATCT                                           | qPCR primers for <i>xylE</i>                                           |
| YQ496-xylE-q-625         | TTCCGGATGGTGAATGAAGG                                            |                                                                        |
| YQ178-WNp213             | GTCTCGTTAGCTCGCTGGATCCTA/3InvdT/                                | cRACE - adapter                                                        |
| YQ179-WNp210             | TAGGATCCAGCGAGCTAACGAGAC                                        | cRACE - forward primer                                                 |
| YQ185-180PTM_r_-115      | GATAGGCCAGGAAACGGAGG                                            | cRACE - nested reverse primers                                         |
| YQ186-180PTM_r_-227      | AGAGCGAGATAGGAGATGACC                                           |                                                                        |
| YQ188-180PTM_r_-46       | CGGCCGAATGGTTTTCGCCATCGG                                        |                                                                        |
| YQ193-180FtdA_f_754      | CAGCACCGATCTGTCCGAAG                                            | <i>ftdA</i> - <i>B</i> junction PCR                                    |
| YQ196-180FtdB_r_234      | GAAGCCGTGATGTATCCGC                                             |                                                                        |
| YQ203-180FtdB_f_203      | AGGTCACCGTCATCACCGAC                                            | <i>ftdB</i> - <i>C</i> junction PCR                                    |
| YQ204-180FtdC_r_146      | TCGAAGATCCGGGTCTGG                                              |                                                                        |
| YQ205-180FtdC_f_134      | AGTACCTCTGCCGTGAACTC                                            | <i>ftdC</i> - <i>D</i> junction PCR                                    |
| YQ206-180FtdD_r_254      | CAGATCTGGTGCATCTCGTTG                                           |                                                                        |
| YQ207-180FtdD_f_244      | GGAAGTATCAAGAAGCACGG                                            | <i>ftdD</i> - <i>E</i> junction PCR                                    |
| YQ208-180FtdE_r_218      | ACCACCTCCATGATCGAGTC                                            |                                                                        |
| YQ209-180FtdE_f_113      | AGATCACCTTCGACCACACC                                            | <i>ftdE</i> - <i>F</i> junction PCR                                    |
| YQ210-180FtdF_r_249      | CTGGTTGAACATGAGGTCCG                                            |                                                                        |
| YQ180-DadpA_u_f_x        | ACTAGTGATCTAGAGCGTCTGG                                          | us for JV180 $\Delta$ <i>adpA</i> plasmid                              |

|                      |                                                                  |                                                   |
|----------------------|------------------------------------------------------------------|---------------------------------------------------|
| YQ189-DadpA_us_r     | CCAGCTCAATGTCGATAAGGG                                            |                                                   |
| YQ190-DadpA_d_f_o    | GAACGCTTCACGCCACGTCCCCTTATCGACATTGAGCTGGGAGGCGT<br>TCGTTCCCGGAC  | ds for JV180 $\Delta$ <i>adpA</i> plasmid         |
| YQ169-DadpA_d_r_h    | ACTAGTGAAAGCTTGTCTACGC                                           |                                                   |
| YQ117-adpA_seq_f_int | TCGAACTCACCGCGCCGTACG                                            | verify $\Delta$ <i>adpA</i> plasmid and mutant    |
| YQ118-adpA_seq_r_int | TCGACGTGCACCGACGGATAG                                            |                                                   |
| YQ164-DadpA_out_f    | ATGGACGATGATCAGACCGG                                             |                                                   |
| YQ165-DadpA_out_r    | TTCCGGTACTACGTACCAAG                                             |                                                   |
| YQ119-AdpA_fw_n      | ACTAGTGACATATGAGCCAGGACTCCGCC                                    | clone <i>adpA</i> into pJMD3                      |
| YQ120-AdpA_rv1_x     | ACTAGTGATCTAGACTACGGGGCGCTCCGCTGTC                               | clone <i>adpA</i> _JV180 into pJMD3               |
| YQ121-AdpA_rv2_x     | ACTAGTGATCTAGACTACGGGGCACTCCGCTGTC                               | clone <i>adpA</i> _IFO13350 into pJMD3            |
| YQ225-adpA_f_x       | ACTAGTGATCTAGAGTGACCGGATTCAGCACAC                                | clone <i>adpA</i> into pSET152                    |
| YQ226-adpA_r_b       | ACTAGTGAGGATCCAGTCGATCCACACCATGCG                                |                                                   |
| YQ191-Dgrh_us_f_x_4  | ACTAGTGATCTAGAGTGGACATCGAAATACTGGG                               | PCR us for JV180 $\Delta$ <i>grhR2-V</i> plasmid  |
| YQ183-Dgrh_us_r_3    | GTTCCGGACGTCATGCGCAC                                             |                                                   |
| YQ184-Dgrh_ds_f_o_2  | GATCACCGCAGGTGGGAAGGGGTGCGCATGACGTCCGAACCCCCGG<br>AGAGAAGGAGCAAG | PCR ds for JV180 $\Delta$ <i>grhR2-V</i> plasmid  |
| YQ163-Dgrh_ds_r_h    | ACTAGTGAAAGCTTCGAAGATCATCCAGAACGCG                               |                                                   |
| YQ146-grh_ds_seq_f   | GTTCCGAGATCTACCGGGTGC                                            | verify $\Delta$ <i>grhR2-V</i> plasmid and mutant |
| YQ147-grh_ds_seq_r   | CATCCCGAAGAAGCTGAACC                                             |                                                   |
| YQ152-grh_ds_seq_f_2 | GAGAACACCATGGCCAAGAG                                             |                                                   |
| YQ153-grh_ds_seq_r_2 | CCTGGCACCTCGGCTTCG                                               |                                                   |
| YQ166-Dgrh_int_f     | CCAGTTCATCATCGACCACC                                             |                                                   |
| YQ167-Dgrh_out_f     | TTCGGACCAGTCGATGATGC                                             |                                                   |
| YQ168-Dgrh_out_r     | CATGACGACGAAGCTCAGCC                                             |                                                   |
| YQ244-grhR2-f-n      | ACTAGTGACATATGAGGATCCGGTTCTGGG                                   | clone JV180 <i>grhR2</i>                          |
| YQ245-grhR2-r-x      | ACTAGTGATCTAGAGGGACGCACGTTTCATGGCAC                              |                                                   |
| YQ246-grhR3-f-n      | ACTAGTGACATATGGACCCGCTCGACGCGGTG                                 | clone JV180 <i>grhR3</i>                          |
| YQ247-grhR3-r-x      | ACTAGTGATCTAGAGGTCAGGCGTCGAGGGCGCC                               |                                                   |
| YQ286-grhF-f-n       | ACTAGTGACATATGCCGCGCTCGCGCCGC                                    | clone JV180 <i>grhF</i>                           |
| YQ287-grhF-r-x       | ACTAGTGATCTAGATCAAGGGCGGTGGAAGAAG                                |                                                   |
| YQ288-grhG-f-n       | ACTAGTGACATATGACCACCGAGACCGCCG                                   | clone JV180 <i>grhG</i>                           |
| YQ289-grhG-r-x       | ACTAGTGATCTAGATCGTCGTCGGTGTTCATCGTC                              |                                                   |
| YQ294-grhH-f-n       | ACTAGTGACATATGACACCGACGACGACCGG                                  | clone JV180 <i>grhH</i>                           |



|                     |                                                                  |                                                          |                                                  |
|---------------------|------------------------------------------------------------------|----------------------------------------------------------|--------------------------------------------------|
| YQ295-grhH-r-x      | ACTAGTGATCTAGATCATCTGCCGCGCCACGTAC                               |                                                          |                                                  |
| YQ298-grhG-r-int    | TACGGGCGTTTGTCTCCAG                                              | verify JV180 <i>grhG</i> clone                           |                                                  |
| YQ351-180accB-f     | ACTAGTGACATATGACCGTTGTGGACGAAAC                                  | clone JV180 <i>accBE</i>                                 |                                                  |
| YQ354-180accE-r     | ACTAGTGATCTAGATCTCAGCCCTGCCAGCTGTG                               |                                                          |                                                  |
| YQ355-13350accB-f   | ACTAGTGACATATGACCGTTGTGGACGAAAC                                  | clone SGR1943-44 (IFO13350 <i>accB</i> )                 |                                                  |
| YQ358-13350accE-r   | ACTAGTGATCTAGATGGTCAGCCCTGCCAGCTGTG                              |                                                          |                                                  |
| YQ359-3281-f        | ACTAGTGACATATGCATGACCGGGTGGGCGAAC                                | clone SGR3280-3281                                       |                                                  |
| YQ362-3280-r        | ACTAGTGATCTAGACTAGCTGCCGGGCACGGGCTC                              |                                                          |                                                  |
| YQ363-180accB-int   | CAGATGTTTCATCACCGGCCC                                            | verify JV180 <i>accBE</i> clone                          |                                                  |
| YQ364-13350accB-int | CCAGAAGGGTGATGATCGGG                                             | verify SGR1943-44 clone                                  |                                                  |
| YQ365-13350grhG-int | AGCGGAATGTTGAAGCGTC                                              | verify SGR3280-3281 clone                                |                                                  |
| YQ372-grihrdBF      | CACCAAGGGCTACAAGTTCT                                             | qPCR primers for <i>hrdB</i> , from Claesen and Bibb(12) |                                                  |
| YQ373-grihrdBR      | CGAGCTTGTTGATGACCTC                                              |                                                          |                                                  |
| YQ376-180ftdB1153   | ATCAACCTGGAGAACCTCAAC                                            | qPCR primers for <i>ftdB</i>                             |                                                  |
| YQ377-180ftdB1278   | GAAGCCGAAGGAGTTGACC                                              |                                                          |                                                  |
| YQ466-grhGHdel-u-f  | GGCCAGTGAATTCGAGCTCGGTACCCGGGGATCCTCTAGAGAGCTG<br>GACCTCGCCTACC  | PCR us for JV180 $\Delta$ <i>grhGH</i> plasmid           |                                                  |
| YQ467-grhGHdel-u-r  | GTCGGATGCGGCGGGTCTC                                              |                                                          |                                                  |
| YQ469-grhGHdel-d-r  | TCACACAGGAAACAGCTATGACCATGATTACGCCAAGCTTCGGGCGT<br>CTACTGTGCGATG | PCR ds for JV180 $\Delta$ <i>grhGH</i> plasmid           |                                                  |
| YQ473-grhGHdel-d-f  | AGGAGATCGCGTGACCACCGAGACCGCCGCGCATCCGACCCCTCCC<br>CCGGTACGTGGCG  |                                                          |                                                  |
| YQ477-grhGHdel-f-i  | TTCTTCCGACCGCCCTTGAG                                             | verify JV180 $\Delta$ <i>grhGH</i> plasmid and mutant    |                                                  |
| YQ478-grhGHdel-f-o  | GAACCAGCTCCACCGGCAG                                              |                                                          |                                                  |
| YQ480-grhGHdel-r-o  | GCGGAGGCGTGGTTCATCC                                              |                                                          |                                                  |
| YQ483-grhGHdel-r-i  | CCGATGTTCTTGCGTTGAC                                              |                                                          |                                                  |
| YQ485-grhQdel-u-f   | GCCAGTGAATTCGAGCTCGGTACCCGGGGATCCTCTAGATCTCCCTCC<br>TGCGTTCCTC   |                                                          | PCR us for JV180 $\Delta$ <i>grhQSAB</i> plasmid |
| YQ486-grhQdel-u-r   | CTCGGGCGGCTCAGCGGTGTGGTTCGGTTCGGTCCGCCCCATCCTG<br>GCCACGATCAGGG  |                                                          |                                                  |
| YQ487-grhBdel-d-f   | GGGGGCGACCGAACCGACCAC                                            | PCR ds for JV180 $\Delta$ <i>grhQSAB</i> plasmid         |                                                  |
| YQ488-grhBdel-d-r   | TCACACAGGAAACAGCTATGACCATGATTACGCCAAGCTTTGGAGCC<br>GAGGTTGACGATC |                                                          |                                                  |
| YQ489-grhQdel-f-i   | AGACAGCTTTGAGAACCGCC                                             | verify JV180 $\Delta$ <i>grhQSAB</i> plasmid and mutant  |                                                  |
| YQ490-grhQdel-f-o   | TTCTCGGTCAACTTCACGGG                                             |                                                          |                                                  |
| YQ491-grhBdel-r-i   | CATCAGAATCGGGCCTCCTC                                             |                                                          |                                                  |
| YQ492-grhBdel-r-o   | GATGTAGGAGGACTGGTCGC                                             |                                                          |                                                  |

|                   |                                                       |                                                                        |
|-------------------|-------------------------------------------------------|------------------------------------------------------------------------|
| CM02-PftdA500bp-F | CGGCTCGACGGGAACCGGGGTGCGTCGTGCCGTGGAGGGCTCCGGCGA      | clone <i>P<sub>ftdA</sub></i> from strain SP18CM02 to construct pKN038 |
| CM02-PftdA500bp-R | TGGCGGATGGTTCGCGCTCGTTCATCGGTGACCTCCACGAGAGTTCCTG     |                                                                        |
| 2-28-us-F         | GTTGTAAAACGACGGCCAGTGCCAGTCGAAGTCGGCCATGCGCACGT       | PCR us for pKN040                                                      |
| 2-28-us-F         | CGGATCATTCCGGCCGTGACGTGAACGATCATCTATTTCCCGATCGCCAGGCT |                                                                        |
| 2-28-ds-F         | AGCCTGGCGATCGGGAAATAGATGATCGTTCACGTACGGCCGGAA         | PCR ds for pKN040                                                      |
| 2-28-ds-F         | CGATATCGCGCGCGCCGCGGATCAGGTGAAGCTGCCGAAGAGGT          |                                                                        |
| 49_68-us-F        | TAAAACGACGGCCAGTGCCATCACCGCGACCACCCGGGTCCG            | PCR us for pKN015                                                      |
| 49_68-us-R        | GGTCAGGGGCACCACACTGACCGATTTCGCGCCGTGACGTGAACCGAT      |                                                                        |
| 49_68-ds-F        | GCATCGTTCACGTACGGCCGGAATGAATCGGTGAGTGTGGTCCCTGACCG    | PCR ds for pKN015                                                      |
| 49_68-ds-R        | ATATCGCGCGCGCCGCGGATCCGTGATGCAGTCCTTGCCCGCCACCAG      |                                                                        |
| 69_88-us-F        | TAAAACGACGGCCAGTGCCATCACCGCGACCACCCGGGTCCG            | PCR us for pKN012                                                      |
| 69_88-us-R        | AGACGATGTCCGGCACGGCGGTGAGCCGACGCCGGCTTCGGATCATTCCGG   |                                                                        |
| 69_88-ds-F        | CCGGAATGATCCGAAGCCGGGCTCGGCCTGACCGCGTCCGGGACATCGTCTCT | PCR ds for pKN012                                                      |
| 69_88-ds-R        | ATATCGCGCGCGCCGCGGATCCGTGATGCAGTCCTTGCCCGCCACCAG      |                                                                        |
| 89_108-us-F       | TAAAACGACGGCCAGTGCCATCACCGCGACCACCCGGGTCCG            | PCR us for pKN016                                                      |
| 89_108-us-R       | GGTCATACCTGTTGGTGAGAGACGAGGCACCACACTGACCGATTCCCGA     |                                                                        |
| 89_108-ds-F       | GTCGGGAATCGGTGAGTGTGGTGCCTCGTCTCTACCAACAGGTATGACCT    | PCR ds for pKN016                                                      |
| 89_108-ds-R       | ATATCGCGCGCGCCGCGGATCCGTGATGCAGTCCTTGCCCGCCACCAG      |                                                                        |
| 109_128-us-F      | TAAAACGACGGCCAGTGCCATCACCGCGACCACCCGGGTCCG            | PCR us for pKN018                                                      |
| 109_128-us-R      | CCGCCGATCGCGTCACCGCAGGTATGTCCGGCACGGCGGTGAGGGCA       |                                                                        |
| 109_128-ds-F      | TGCCCCTGACCGCCGTGCCGGACATGACCTGCGGTGACGCGATGCGGC      | PCR ds for pKN018                                                      |
| 109_128-ds-R      | ATATCGCGCGCGCCGCGGATCCGTGATGCAGTCCTTGCCCGCCACCAG      |                                                                        |
| 129_148-us-F      | TAAAACGACGGCCAGTGCCATCACCGCGACCACCCGGGTCCG            | PCR us for pKN017                                                      |
| 129_148-us-R      | TCCTGCTGGGGGAGAGAGGCCCGCTACTGTTGGTGAGAGACGATGTCCGG    |                                                                        |
| 129_148-ds-F      | GACATCGTCTCTACCAACAGGTACGGCGGCCTCTCTCCCCAGGCAAGGA     | PCR ds for pKN017                                                      |
| 129_148-ds-R      | ATATCGCGCGCGCCGCGGATCCGTGATGCAGTCCTTGCCCGCCACCAG      |                                                                        |
| 149_181-us-F      | TAAAACGACGGCCAGTGCCATCACCGCGACCACCCGGGTCCG            | PCR us for pKN019                                                      |
| 149_181-us-R      | CGTCTGTTTCATCGGTGACCTCCACATCGCGTCACCGCAGGTGATACCTGT   |                                                                        |
| 149_181-ds-F      | AGGTATGACCTGCGGTGACGCGATGTGGAGGGTACCGATGAACGAGCGCG    | PCR ds for pKN019                                                      |
| 149_181-ds-R      | ATATCGCGCGCGCCGCGGATCCGTGATGCAGTCCTTGCCCGCCACCAG      |                                                                        |
| -528_-31-us-F     | GTTGTAAAACGACGGCCAGTGCCAACCGGACAGTCCCACGCGCA          | PCR us for pKN028                                                      |

|                    |                                                           |                                                               |
|--------------------|-----------------------------------------------------------|---------------------------------------------------------------|
| -528_-31-us-R      | TATTTCCCGATCGCCAGGCTTTAATTGTCGTACGACGTCCGCGGGTG           |                                                               |
| -528_-31-ds-F      | CACCGCGGGACGTCTGACACAATTAAGCCTGGCGATCGGGAAATA             | PCR ds for pKN028                                             |
| -528_-31-ds-F      | CGATATCGCGCGGCCGCGGATCTCATTCCGGGCGGGTGGTGCCCGGT           |                                                               |
| -528_-38-us-F      | GTTGTAAAACGACGGCCAGTGCCAACGCTCACCCCTTCGAGGCCGCCA          | PCR us for pKN031                                             |
| -528_-38-us-R      | ATTTCCCGATCGCCAGGCTTTAACCACCACTTGTCTGACGACGTCCGCGCGGTGCGC |                                                               |
| -528_-38-ds-F      | GCGCACCGCGGGACGTCTGACACAAGTGGTGGTTAAAGCCTGGCGATCGGGAAAT   | PCR ds for pKN031                                             |
| -528_-38-ds-F      | CGATATCGCGCGGCCGCGGATCGCCGGTGTCTCGGGACTGGCCA              |                                                               |
| -528_-31seq-us-F   | AAAATACCGCATCAGGCGCCATTC                                  | Sequencing primers for pKN028 and pKN038                      |
| -528_-31seq-us-R   | CAACAGGTATGACCTGCGGT                                      |                                                               |
| -528_-31seq-ds-F   | ATCTCTCCGCGTTGACCTC                                       |                                                               |
| -528_-31seq-ds-R   | AAAGCGGGCAGTGAGCGCAAC                                     |                                                               |
| -528_-31mut-F      | TGCGCGAGAAGTCGAAGGTGAG                                    | verify $P_{ftdA}$ $\Delta(-528_-31)$ and $(-528_-38)$ mutants |
| -528_-31mut-R      | ATCCCATCCAGGCGTAATG                                       |                                                               |
| -35JV254-us-F      | GTTGTAAAACGACGGCCAGTGCCAACGCGGACAGTCCCACGCGCA             | PCR us for pKN047                                             |
| -35JV254-us-R      | TATTTCCCGATCGCCAGGCTTTAATCACGCCTTGTCTGACGACGTCCGCGCGGTG   |                                                               |
| -35JV254-ds-F      | CACCGCGGGACGTCTGACACAAGGCGTGATTAAGCCTGGCGATCGGGAAATA      | PCR ds for pKN047                                             |
| -35JV254-ds-R      | CGATATCGCGCGGCCGCGGATCTCATTCCGGGCGGGTGGTGCCCGGT           |                                                               |
| -35JV255-us-F      | GTTGTAAAACGACGGCCAGTGCCAACGCGGACAGTCCCACGCGCA             | PCR us for pKN048                                             |
| -35JV255-us-R      | TATTTCCCGATCGCCAGGCTTTAACCACGCCTTGTCTGACGACGTCCGCGCGGTG   |                                                               |
| -35JV255-ds-F      | CACCGCGGGACGTCTGACACAAGGCGTGGTTAAAGCCTGGCGATCGGGAAATA     | PCR ds for pKN048                                             |
| -35JV255-ds-R      | CGATATCGCGCGGCCGCGGATCTCATTCCGGGCGGGTGGTGCCCGGT           |                                                               |
| -35JV256-us-F      | GTTGTAAAACGACGGCCAGTGCCAACGCGGACAGTCCCACGCGCA             | PCR us for pKN049                                             |
| -35JV256-us-R      | TATTTCCCGATCGCCAGGCTTTAATCACGACTTGTCTGACGACGTCCGCGCGGTG   |                                                               |
| -35JV256-ds-F      | CACCGCGGGACGTCTGACACAAGTGTGATTAAGCCTGGCGATCGGGAAATA       | PCR ds for pKN049                                             |
| -35JV256-ds-R      | CGATATCGCGCGGCCGCGGATCTCATTCCGGGCGGGTGGTGCCCGGT           |                                                               |
| -35JV257-us-F      | GTTGTAAAACGACGGCCAGTGCCAACGCGGACAGTCCCACGCGCA             | PCR us for pKN050                                             |
| -35JV257-us-R      | TATTTCCCGATCGCCAGGCTTTAATCACGGCTTGTCTGACGACGTCCGCGCGGTG   |                                                               |
| -35JV257-ds-F      | CACCGCGGGACGTCTGACACAAGCCGTGATTAAGCCTGGCGATCGGGAAATA      | PCR ds for pKN050                                             |
| -35JV257-ds-R      | CGATATCGCGCGGCCGCGGATCTCATTCCGGGCGGGTGGTGCCCGGT           |                                                               |
| Seq-35box_JV1836-F | AGGACGATCTCCTCCGCG                                        | verify double crossover for -35 box mutants                   |
| Seq-35box_JV1836-F | GAGGAGGCGAACCATTGT                                        |                                                               |
| G35T-us-F          | TAAAACGACGGCCAGTGCCATCACCGCGACCCCGGGTCCG                  | PCR us for pKN001                                             |

|                     |                                                            |                                                              |
|---------------------|------------------------------------------------------------|--------------------------------------------------------------|
| G35T-us-R           | TCATTCCGGCCGTGAAGTGAACCGATGCCCCCTGACCC                     |                                                              |
| G35T-ds-F           | GGGCATCGTTCACTTCACGGCCGGAATGATCCGAAG                       | PCR ds for pKN001                                            |
| G35T-ds-R           | ATATCGCGCGGGCCGCGGATCGGAGGCCGACGGCGGTGGGCT                 |                                                              |
| C37A-us-F           | TAAAACGACGGCCAGTGCCATCACCGCGACCACCCGGGTCGG                 | PCR us for pKN003                                            |
| C37A-us-R           | GATCATTCCGGCCGTTACGTGAACCGATGCCCCCTGACC                    |                                                              |
| C37A-ds-F           | GCATCGTTACGTAACGGCCGGAATGATCCGAAGCCGG                      | PCR ds for pKN003                                            |
| C37A-ds-R           | ATATCGCGCGGGCCGCGGATCGGAGGCCGACGGCGGTGGGCT                 |                                                              |
| G40T-us-F           | TAAAACGACGGCCAGTGCCATCACCGCGACCACCCGGGTCGG                 | PCR us for pKN002                                            |
| G40T-us-R           | TCGGATCATTCCGGCAGTGACGTGAACCGATGCCCCCT                     |                                                              |
| G40T-ds-F           | TCGGTTCACGTACTGCCGGAATGATCCGAAGCCGGGCG                     | PCR ds for pKN002                                            |
| G40T-ds-R           | ATATCGCGCGGGCCGCGGATCGGAGGCCGACGGCGGTGGGCT                 |                                                              |
| C42A-us-F           | TAAAACGACGGCCAGTGCCATCACCGCGACCACCCGGGTCGG                 | PCR us for pKN004                                            |
| C42A-us-R           | CTTCGGATCATTCCGTCCGTGACGTGAACCGATGCCCC                     |                                                              |
| C42A-ds-F           | GGTTCACGTACGGACGGAATGATCCGAAGCCGGGCGTC                     | PCR ds for pKN004                                            |
| C42A-ds-R           | ATATCGCGCGGGCCGCGGATCGGAGGCCGACGGCGGTGGGCT                 |                                                              |
| Seq-AdpA-us-F       | AAAATACCGCATCAGGCGCCATTC                                   | Sequencing primers for pKN001-004                            |
| Seq-AdpA-us-R       | ACTGACCCAGGCCGGATCCCAT                                     |                                                              |
| Seq-AdpA-ds-F       | TAATCCTACTAAGGAATGTCC                                      |                                                              |
| Seq-AdpA-ds-R       | AAAGCGGGCAGTGAGCGCAAC                                      |                                                              |
| AdpAMT-R            | ATGCTTCCGGCTCGTATGTTG                                      | verify double cross-over for AdpA binding site mutants       |
| AdpAMT-R1           | CAGGACAGGTCCGGAGCCGTA                                      |                                                              |
| AdpAMT35-F          | GTTCACTTCACGGCCGGAAT                                       | verify double cross-over for G35T mutant                     |
| AdpAMT37-F          | GTTACGTAACGGCCGGAAT                                        | verify double cross-over for C37A mutant                     |
| AdpAMT40-F          | GTTACGTCACTGCCGGAAT                                        | verify double cross-over for G40T mutant                     |
| AdpAMT42-F          | GTTACGTCACGGACGGAAT                                        | verify double cross-over for C42A mutant                     |
| AdpAop-seq-F1       | CTCGACGGGAACCGGGGGT                                        | amplify AdpA binding site to sequence binding site mutations |
| AdpAop-seq-R1       | ACCCAGGCCGGATCCCATCCAG                                     |                                                              |
| grhR1-grhE-us-F     | GTTGTAAAACGACGGCCAGTGCCAAAGGGGTGCGGCCCGTCGAGC<br>GGGA      | PCR us for pKN027                                            |
| grhR1-grhE-us-R     | GAAGGGGCGCACGGGCGTCCGCCGTCTGCGCTCCACCCGCGGTCTGA<br>TACGGGT |                                                              |
| grhR1-grhE-ds-F     | ACCCGTATCGACCGGGTGGAGCGCAGACGGCGGACCCCGTGC<br>CCCCTTC      | PCR ds for pKN027                                            |
| grhR1-grhE-ds-R     | CGATATCGCGCGGGCCGCGGATCAGCGCCCGTGGGCGCCGAAG<br>TCCA        |                                                              |
| grhR1-grhE-seq-us-F | AAAATACCGCATCAGGCGCCATTC                                   | Sequencing primers for pKN027                                |
| grhR1-grhE-seq-us-R | TCGGAGGGTGCTGGGATGG                                        |                                                              |
| grhR1-grhE-seq-ds-F | CCATCCCAGCACCTCCGA                                         |                                                              |
| grhR1-grhE-seq-ds-R | AAAGCGGGCAGTGAGCGCAAC                                      |                                                              |
| grhR1-E-mut-F1      | TGCACGCCGCTTACCGGAAG                                       | Primers PCR used to verify $\Delta$ grhR1-E                  |
| grhR1-E-mut-R1      | CTGCGGTACGACCTCCAGCAT                                      |                                                              |
| grhR1-E-mut-F2      | TCGTCTACGGACTGGTCGCG                                       |                                                              |

|                        |                                                             |                                        |
|------------------------|-------------------------------------------------------------|----------------------------------------|
| grhR1-E-mut-R2         | CTCCGTACGCGTTTCCGTGT                                        |                                        |
| grhR1-E-mut-F3         | ACTCGGTGTTCCACCGGTG                                         |                                        |
| grhR1-E-mut-R3         | CGGCGGTCTCAGGGATGT                                          |                                        |
| grhR1-E-mut-F4         | TGCTGTGGGCGCTGACCG                                          |                                        |
| grhR1-E-mut-R4         | TTCGCGTCCACCCGATC                                           |                                        |
| grhF-grhH-us-F         | GTTGTAAAACGACGGCCAGTGCCAACGGCCTTCCACCACAGTCCCA<br>CCGT      | PCR us for pKN029                      |
| grhF-grhH-us-R         | TGGCGCGGGCGCCCGGGCGGGGGCGTCCGCCGTTCAGGGCTT<br>CG            |                                        |
| grhF-grhH-ds-F         | CGAAGCCCTGAACGCGGACGCCCCGCGCCGGCGCCGCCGCGC<br>CA            | PCR ds for pKN029                      |
| grhF-grhH-ds-R         | CGATATCGCGCGCGCCGCGGATCTCCGGTCGCTCGCCACCCGAAC<br>T          |                                        |
| grhF-grhH-seq-<br>us-F | AAAATACCGCATCAGGCGCCATTC                                    | Sequencing primer for pKN029           |
| grhF-grhH-seq-<br>us-R | ACGCGTACGGAGTCGGGCAC                                        |                                        |
| grhF-grhH-seq-<br>ds-F | GTGCCCGACTCCGTACGCGT                                        |                                        |
| grhF-grhH-seq-<br>ds-R | AAAGCGGGCAGTGAGCGCAAC                                       |                                        |
| grhF-H-mut-F1          | AGACCGACCCGGCGGAGC                                          | Primers used to verify $\Delta$ grhF-H |
| grhF-H-mut-R1          | TCGTGGCGGGCCACGCCG                                          |                                        |
| grhF-H-mut-F2          | GTCTCGCTGGCCTGGCCGA                                         |                                        |
| grhF-H-mut-R2          | TGCCAGCCGGTGCCGGTG                                          |                                        |
| grhF-H-mut-F3          | TACGCGCAGAGCGCCGTG                                          |                                        |
| grhF-H-mut-R3          | CGGTCGTCGGAGACGAACT                                         |                                        |
| grhI-grhP-us-F         | GTTGTAAAACGACGGCCAGTGCCATCGATCCCGCTGGTGACCCTGGT<br>CGA      | PCR us for pKN030                      |
| grhI-grhP-us-R         | ACCGGCCTGGACCGGTCTCCGGCGGCCGGTGGGTCTCTCCTGACGTG<br>GGTCCGAG |                                        |
| grhI-grhP-ds-F         | CTCGGACCCACGTGAGGAGAGACCCACCGCCCGGAGACCCGGTC<br>CAGGCCGGT   | PCR ds for pKN030                      |
| grhI-grhP-ds-R         | CGATATCGCGCGCGCCGCGGATCGGCGACCTGCGAGCGGAACGCC<br>GACGCGT    |                                        |
| grhI-grhP-seq-us-<br>F | AAAATACCGCATCAGGCGCCATTC                                    | Sequencing primers for pKN030          |
| grhI-grhP-seq-us-<br>R | AGATGACCGCCCGGCCGGGC                                        |                                        |
| grhI-grhP-seq-ds-<br>F | GCCCCGCCGGGCGGTCATCT                                        |                                        |
| grhI-grhP-seq-ds-<br>R | AAAGCGGGCAGTGAGCGCAAC                                       |                                        |
| grhI-P-mut-F1          | ACCGAGCTGGAGGACGAC                                          | Primers used to verify $\Delta$ grhI-P |
| grhI-P-mut-R1          | AGGGTCTCGAAGGCGGTCA                                         |                                        |
| grhI-P-mut-F2          | ACCTCTTCGCTGGGTGACC                                         |                                        |
| grhI-P-mut-R2          | GCCGAAGACCACCATGTAGA                                        |                                        |
| grhI-P-mut-F3          | TCCGCGCCGAACGGGACG                                          |                                        |
| grhI-P-mut-R3          | GATCGGGACCAGCAGCGAGT                                        |                                        |
| pET11a-AdpA-F          | TATCATATGAGCCAGGACTCCGCCACC                                 | clone <i>adpA</i> for pKN052           |



**Table S4. % Identity of 16S, concatenated MLST genes, and PTM enzyme amino acid sequences of the strains used in this study, relative to *Streptomyces* sp. strain JV180.** Average Nucleotide Identity (ANI) values were calculated using the OrthoANIu algorithm (13).

| Strain                                                                     | 16S   | MLST <sup>#</sup> | FtdA  | FtdB  | FtdC  | FtdD  | FtdE  | FtdF  | ANI   |
|----------------------------------------------------------------------------|-------|-------------------|-------|-------|-------|-------|-------|-------|-------|
| <i>Streptomyces</i> sp. strain JV180                                       | 100   | 100               | 100   | 100   | 100   | 100   | 100   | 100   | 100   |
| <i>S.</i> sp. strain SP18CM02                                              | 100   | 99.91             | 99.36 | 99.4  | 100   | 99.83 | 100   | 98.96 | 98.97 |
| <i>S. californicus</i> strain NRRL B-3320 (JV251)                          | 99.93 | 99.75             | 99.36 | 98.52 | 99.64 | 99.30 | 99.72 | 99.74 | 98.36 |
| <i>S. floridae</i> strain NRRL 2423 (JV252)                                | 99.79 | 99.72             | 99.68 | 98.74 | 99.82 | 99.65 | 99.15 | 99.48 | 98.63 |
| <i>S. puniceus</i> strain NRRL B-2895 (JV253)                              | 99.11 | 99.80             | 99.36 | 98.89 | 99.82 | 99.83 | 99.43 | 98.96 | 98.64 |
| <i>S. griseus</i> subsp. <i>griseus</i> strain NRRL F-5144 (JV254)         | 99.79 | 97.37             | 83.44 | 87.74 | 91.34 | 91.30 | 91.17 | 87.21 | 89.03 |
| <i>S. globisporus</i> subsp. <i>globisporus</i> strain NRRL B-2709 (JV255) | 99.59 | 97.49             | 81.21 | 87.11 | 87.95 | 92.00 | 89.74 | 86.68 | 89.27 |
| <i>S. albus</i> subsp. <i>albus</i> strain NRRL B-2445 (JV256)             | 99.59 | 97.19             | 81.37 | 88.64 | 93.04 | 92.32 | 91.74 | 87.21 | 88.86 |
| <i>S. griseus</i> subsp. <i>griseus</i> strain NRRL WC-3480 (JV257)        | 99.73 | 97.74             | 82.48 | 88.01 | 91.96 | 92.86 | 91.45 | 87.99 | 88.53 |
| <i>S. baarnensis</i> strain NRRL B-2842 (JV258)                            | 99.59 | 97.14             | 81.37 | 88.55 | 93.04 | 92.32 | 91.74 | 87.21 | 88.87 |
| <i>S. griseus</i> subsp. <i>griseus</i> strain IFO13350                    | 99.73 | 97.70             | 83.44 | 88.11 | 92.14 | 93.03 | 91.17 | 87.99 | 88.62 |

# - MLST: concatenated partial sequences of *atpD*, *gyrB*, *recA*, *rpoB*, and *trpB* corresponding to the sequences used in references (14, 15)

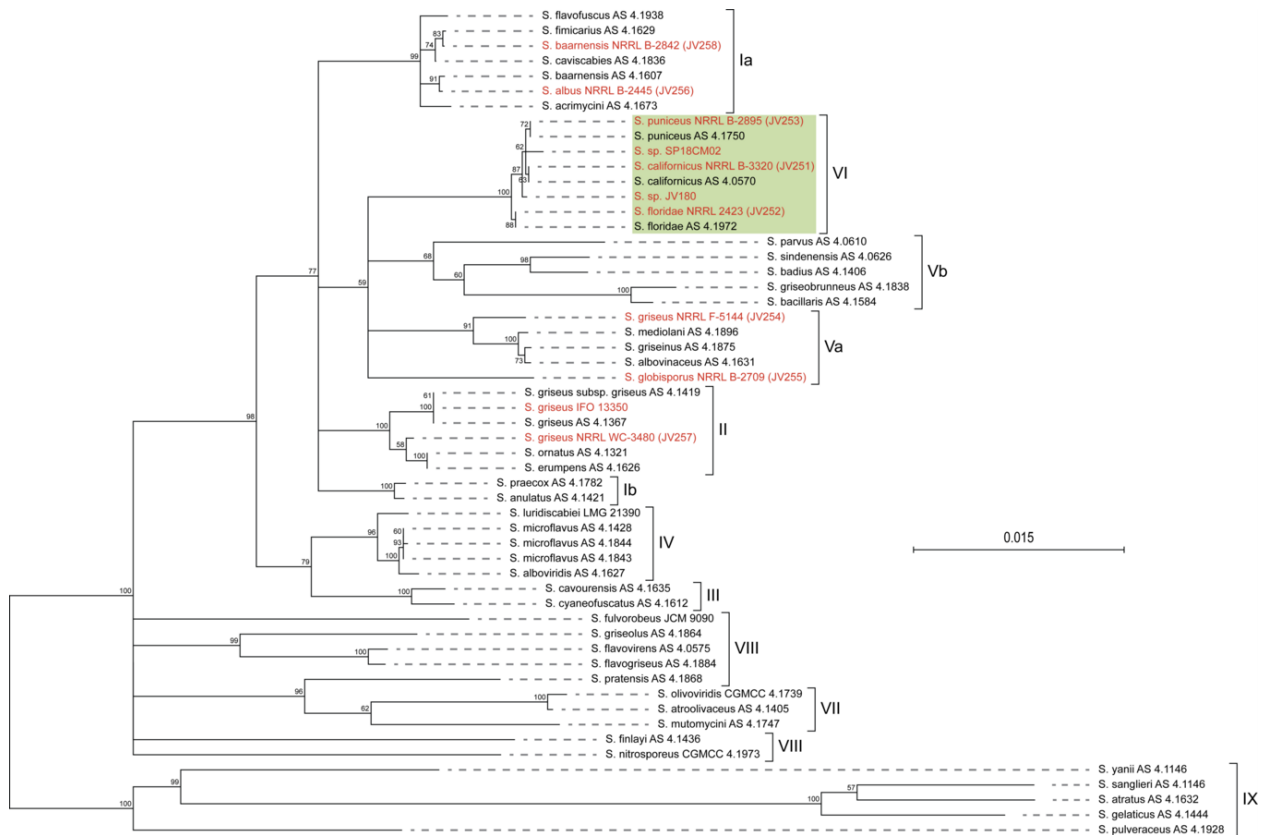

**Figure S1. Maximum likelihood phylogenetic tree of selected *S. griseus* clade strains.** Strains used in this study are highlighted in red for clarity and all other strains are previously published members of the *S. griseus* clade (black). The strain JV180-like group is highlighted in green, which includes several apparent members of cluster VI as defined by Rong *et al* (14, 15). This MLST phylogeny was created from *atpD*, *gyrB*, *recA*, *rpoB*, and *trpB* sequences obtained from published lists (strains in black (14, 15)), in-house sequencing (JV180 and SP18CM02 (7)) or from GenBank (other strains in red). Sequences were aligned with MUSCLE and the alignments were concatenated. The maximum likelihood tree was built using the GTR+I+G model using CLC Main Workbench. Branches supported by less than 50% of 500 bootstrap simulations were collapsed.



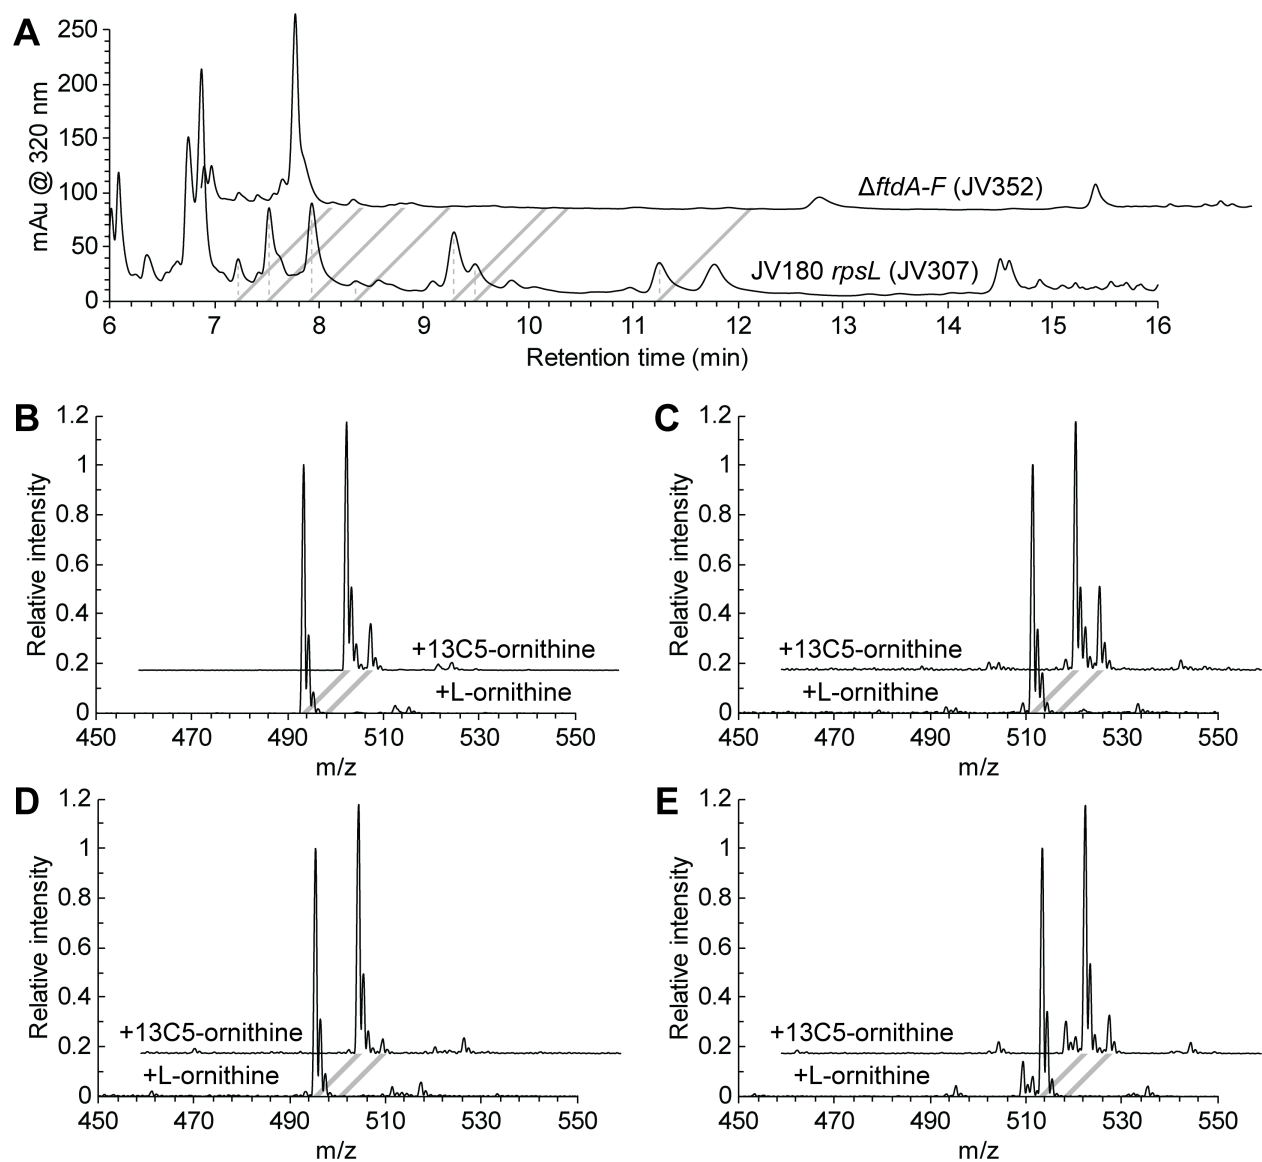

Figure S2. Genetic and metabolomic identification of PTMs produced by  $^{13}\text{C}_5$ -ornithine feeding. **(A)** LC-MS chromatograms of extracts from JV180 *rpsL* and  $\Delta$ *ftdA-F* mutants. The retention times of major PTM peaks were marked in gray. **(B)** Mass spectra of clifednamide A produced by the known clifednamide producer *S. torulosus* strain NRRL B-3889(11) on media supplemented with 50 mg/L of L-ornithine or  $^{13}\text{C}_5$ -labeled L-ornithine. Mass spectra of selected PTM peaks produced by JV180 on media supplemented with 50 mg/L of L-ornithine or  $^{13}\text{C}_5$ -labeled L-ornithine, which eluted at **(C)** 8.4, **(D)** 11.2, and **(E)** 7.9 minutes.

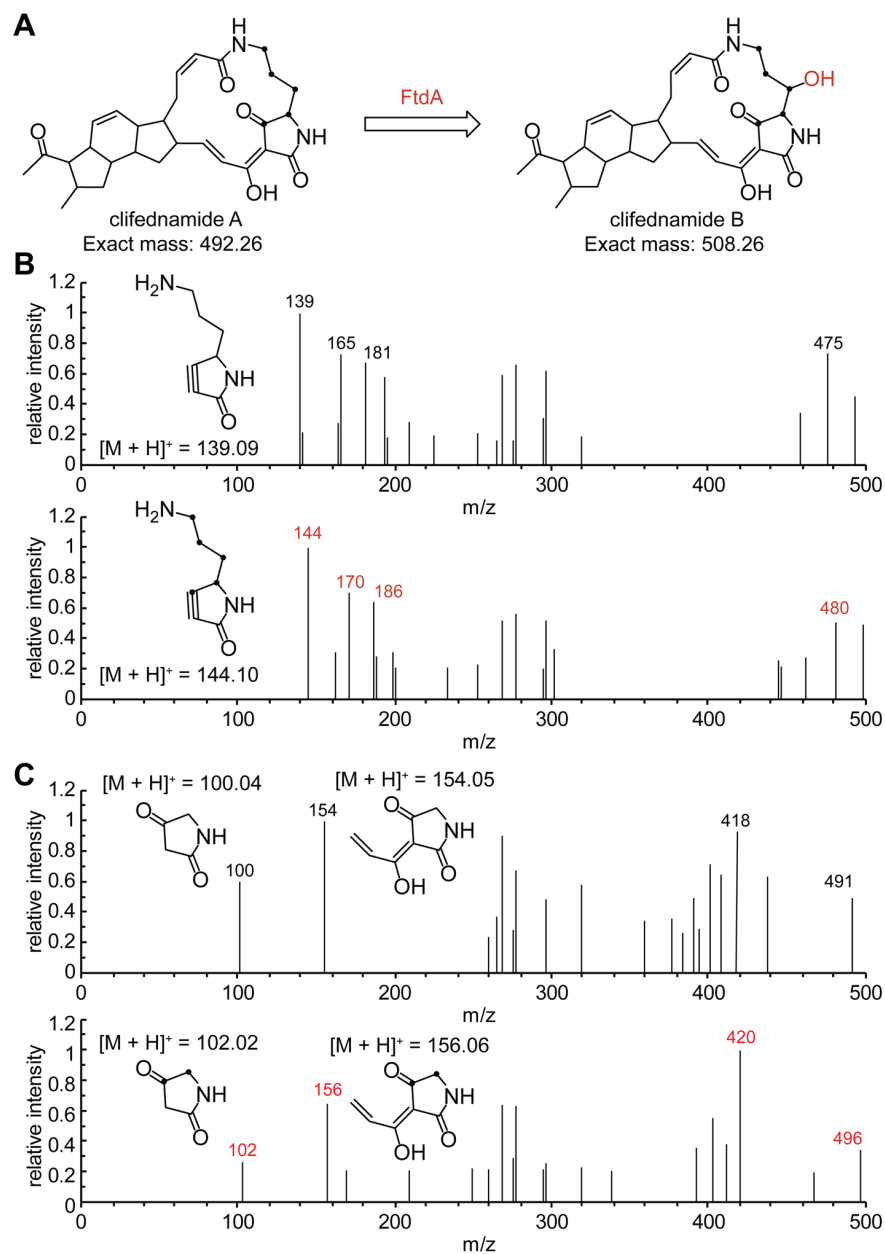

**Figure S3. Tandem mass spectrometry-based identification and quantification of PTMs.** (A) The structures of known clifednamides A and B, which differ by an FtdA-installed hydroxylation (shown in red). The product ion spectra of (B) clifednamide A and (C) clifednamide B produced by collision-induced dissociation at 20 V. Mass spectra were converted to centroids for visual clarity. *S. torulosus* strain NRRL B-3889 was grown on media supplemented with (top) L-ornithine or (bottom)  $^{13}\text{C}_5$ -labeled L-ornithine. Inset: proposed structures of ornithine-derived fragments, with  $^{13}\text{C}_5$  atoms indicated by heavy dots, which would result in the heavier daughter ions observed (red).

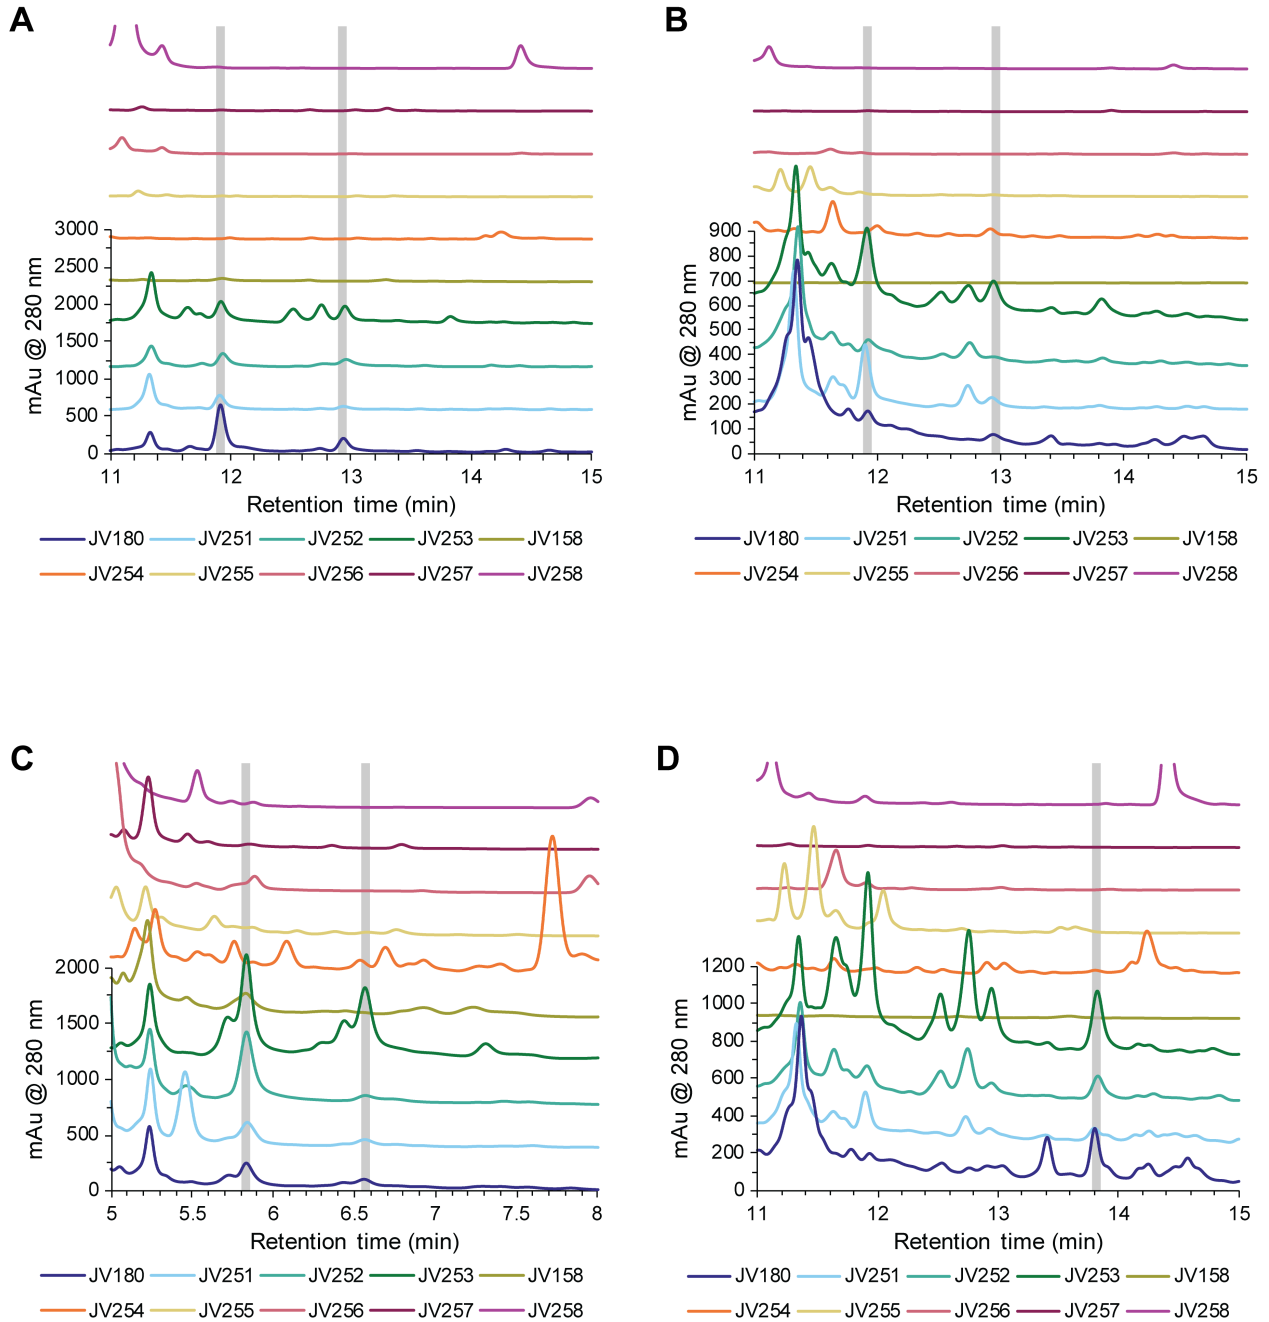

**Figure S4. PTM production by *S. griseus* clade strains on various media: (A) ISP2 (Difco), (B) ISP4 (Difco), (C) ISP-S (see methods), and (D) YMS8 (0.4% yeast extract; 1% malt extract; 1.2% soluble starch; 2% agar; pH 7.4). Retention times for PTM peaks are highlighted in gray.**

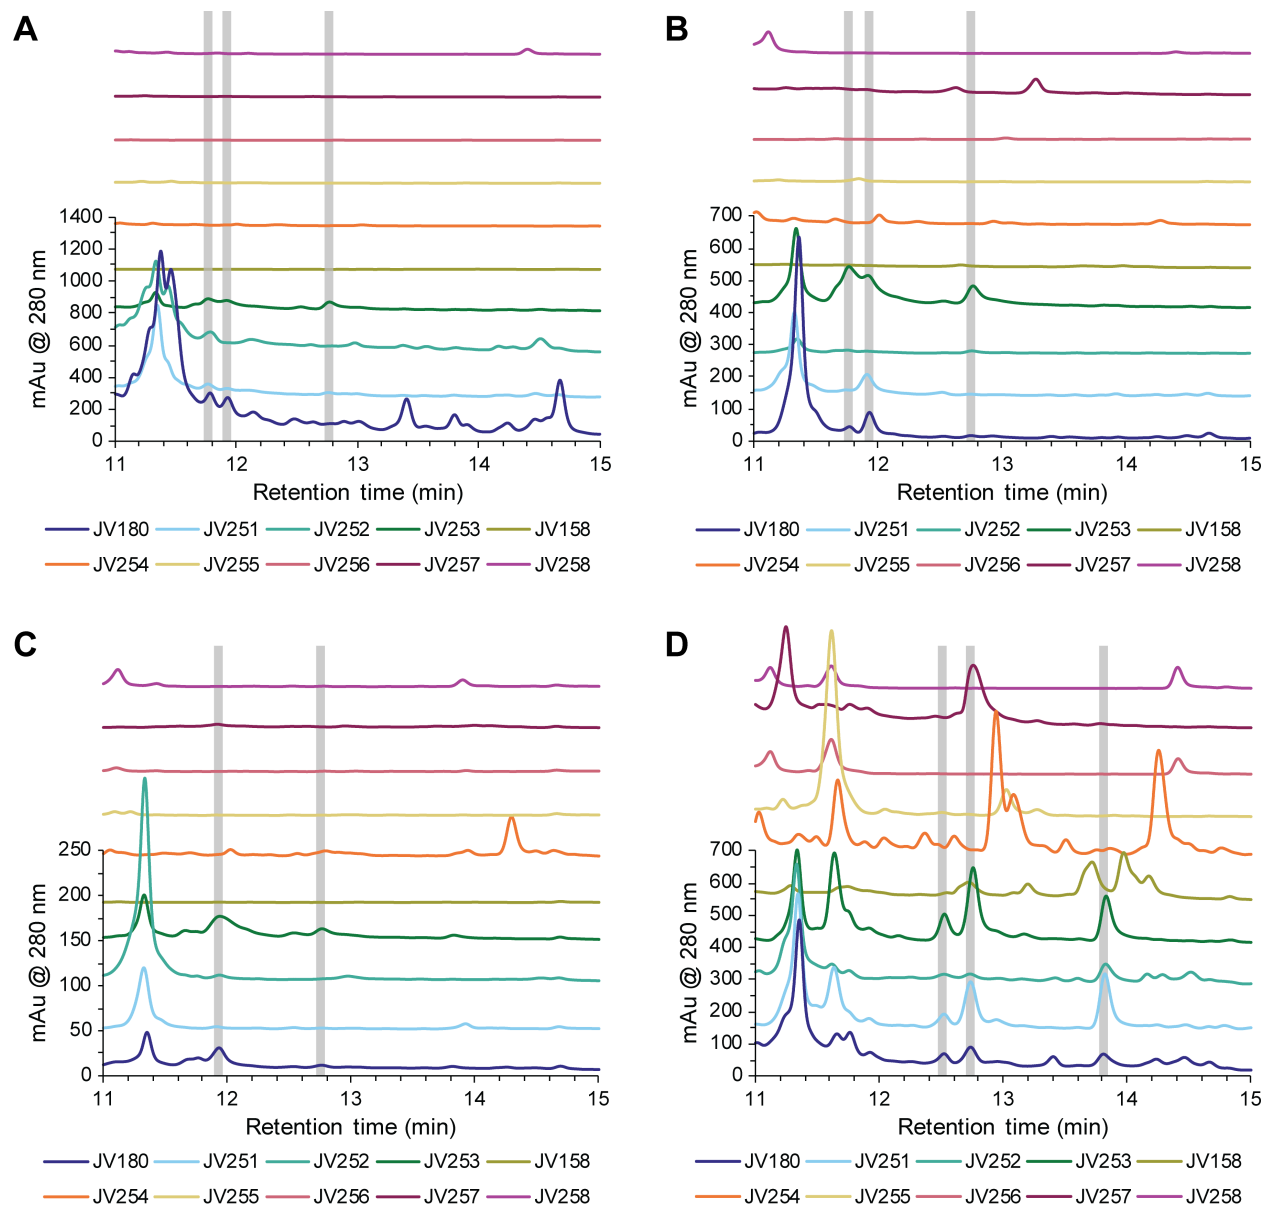

**Figure S5. PTM production by *S. griseus* clade strains on various media: (A) supplemented minimal medium (16), (B) minimal medium (16), (C) low tryptone-yeast extract (16), and (D) medium 2 (17). Retention times for PTM peaks are highlighted in gray.**

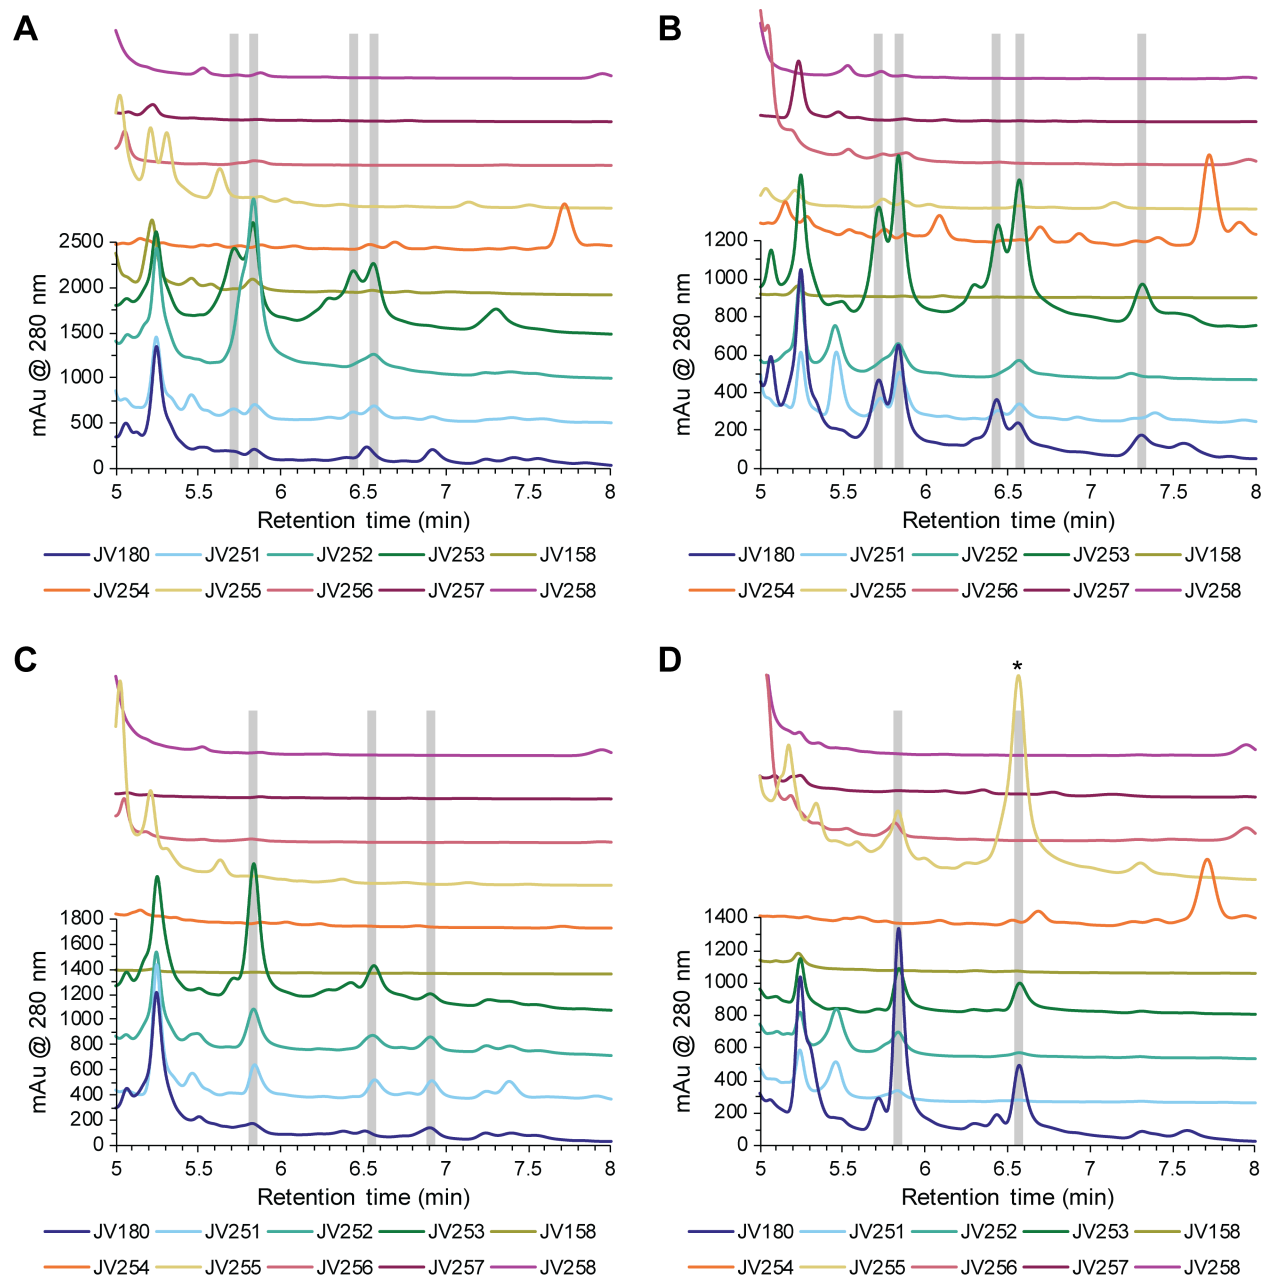

**Figure S6. PTM production by *S. griseus* clade strains on various media: (A) YMS (16), (B) ATCC172, (C) Hickey-Tresner (18), and (D) SFM (16). Retention times for PTM peaks are highlighted in gray. A peak marked with an asterisk in the extract of JV255 from SFM had a similar retention time as PTMs but did not have the correct absorbance spectrum.**

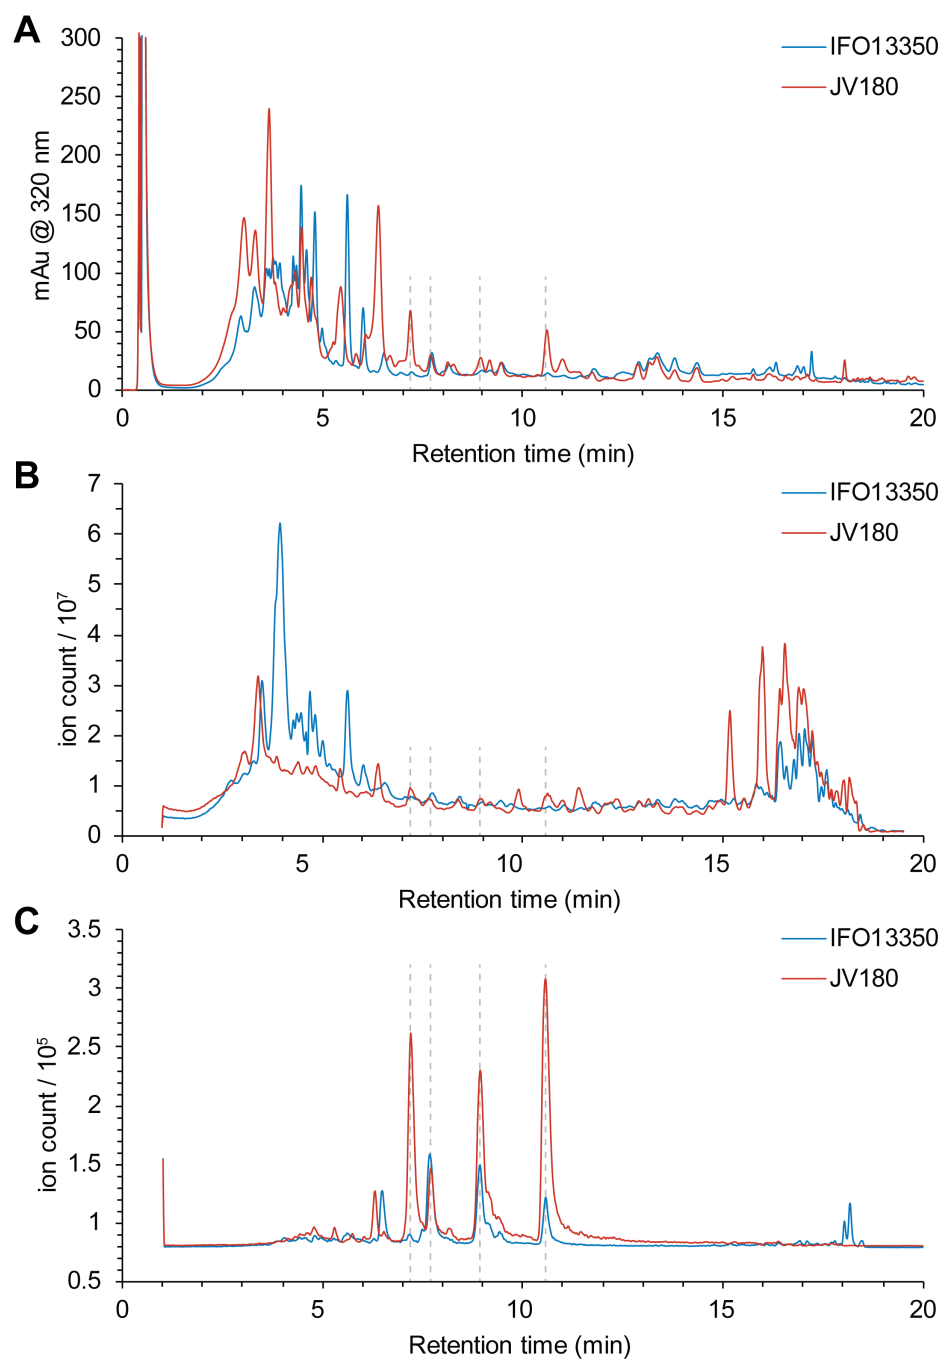

**Figure S7. Improved detection for PTMs via LC-MS/MS.** Chromatograms of extracts of (Red) *Streptomyces* sp. strain JV180 and (blue) *Streptomyces griseus* subsp. *griseus* strain IFO13350 monitored using (A) UV absorbance at 280 nm, (B) MS scan mode in positive mode for  $m/z$  from 100-1000, and (C) precursor ion scan mode for ions fragmenting into  $m/z$  139 or 154 daughter ions. Retention times for prominent PTM peaks are marked with dotted grey lines.

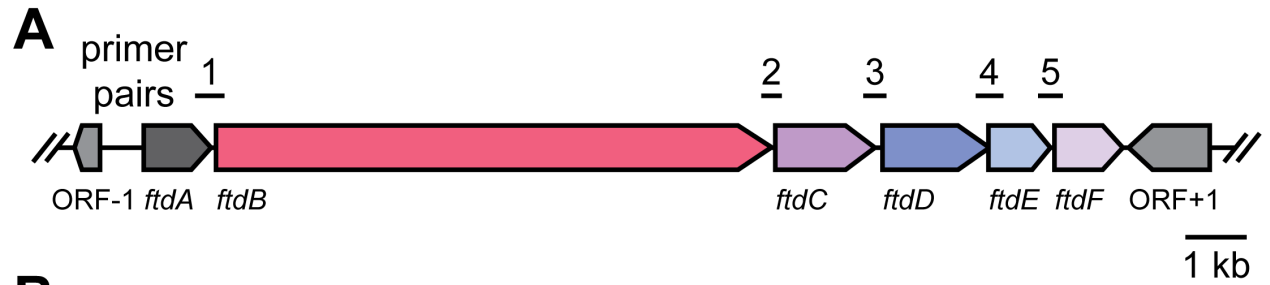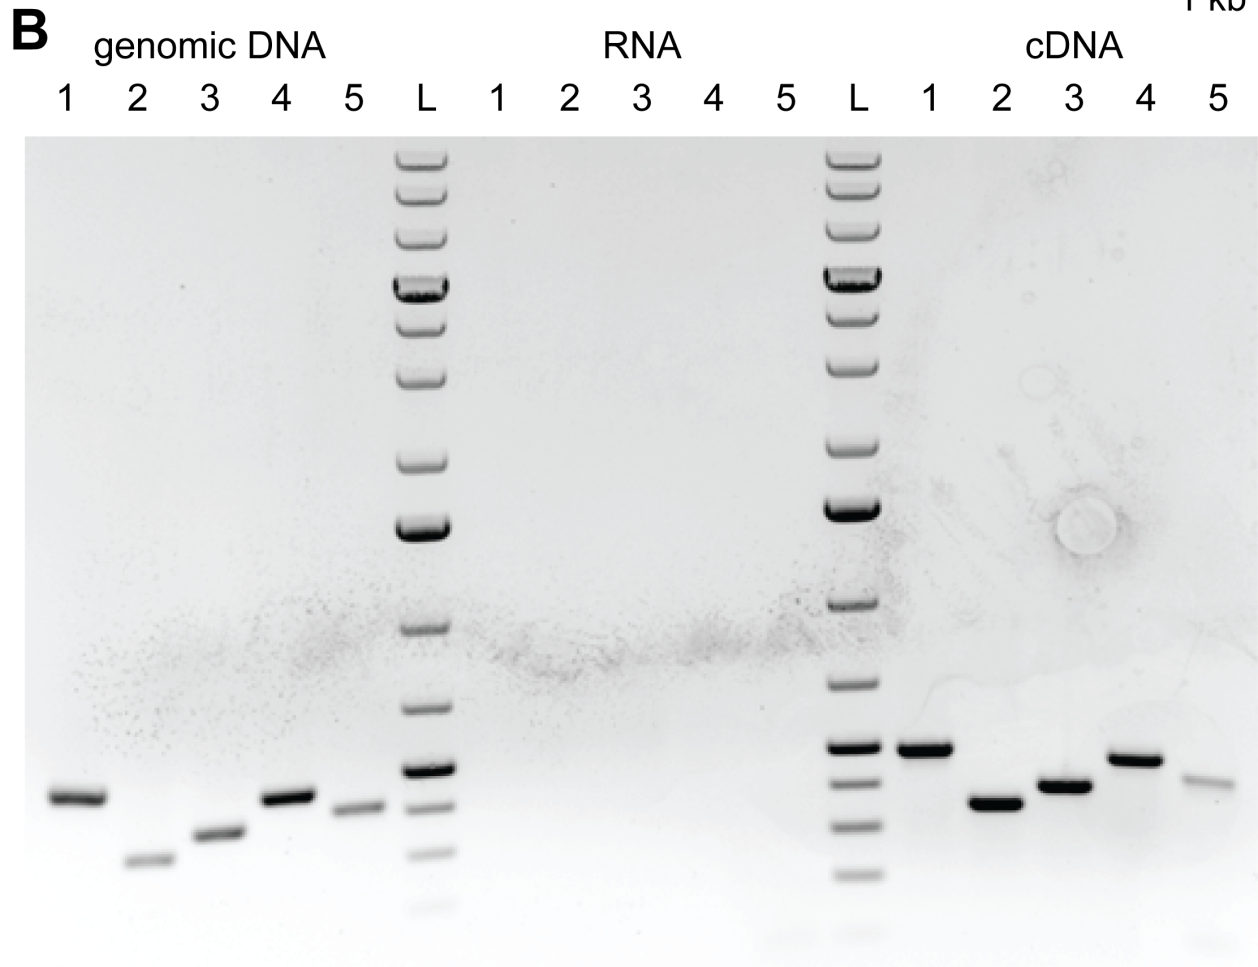

**Figure S8. *ftdA-F* are transcribed on one mRNA molecule.** (A) Diagram of the PTM biosynthetic gene cluster, and PCR probes for intergenic regions. (B) PCR amplification of PTM intergenic regions using genomic DNA (positive control), RNA (negative control), and cDNA templates. Ladder: GeneRuler 1kb Plus DNA marker (Thermo Fisher)

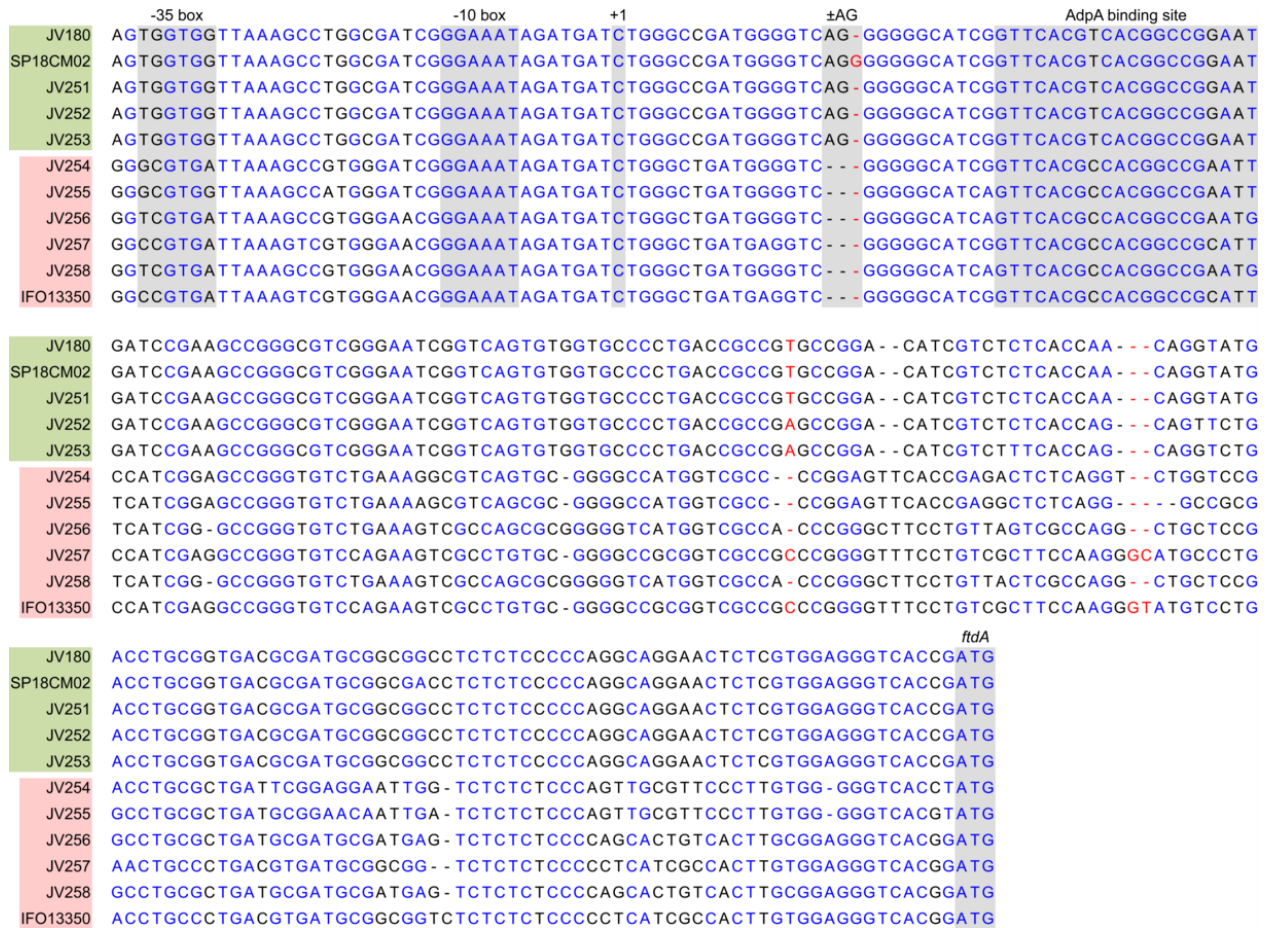

**Figure S9. Nucleotide alignment of PTM promoters and 5' UTRs belonging to *S. griseus* clade strains used in this study.** Nucleotides in blue have >70% conservation, while nucleotides in red have <30% conservation. Many nucleotides in black (between 30-70% conservation) are still conserved within the JV180-like strain (green) and IFO13350-like strain groups (red). Nucleotides were aligned using MUSCLE with 500 bootstrap simulations.



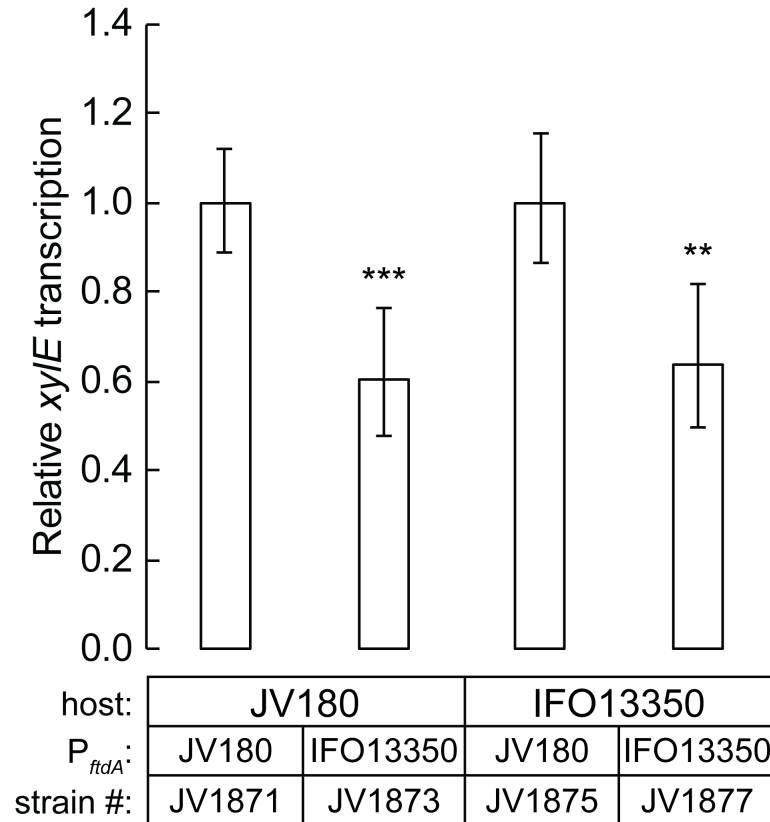

**Figure S10.  $P_{ftdA\_JV180}$  drives stronger *xyIE* transcription than  $P_{ftdA\_IFO13350}$ .** RT-qPCR was used to compare *xyIE* transcript abundance from different  $P_{ftdA}$ -*ftdA*-*xyIE* constructs in both JV180 and IFO13350 hosts. We used the  $P_{ftdA}$ -*ftdA*-*xyIE* constructs in case proper expression required mRNA secondary structures forming from the 5' UTR and the *ftdA* coding sequences. Relative transcription and statistical significance were calculated by Student's T-test relative to the JV180  $P_{ftdA}$  in each respective host strain (n = 6; \*p < 0.05, \*\*p < 0.01, \*\*\*p < 0.001).

JV180 genome TATTTTGATGAGCAAGTGGTGGTTAAAGCCTGGCGATCGGAAATAGATGATCTGGGCCGATGGGGTCAGGGGGGCATCGGTTACGTCACGGCCGGAAT

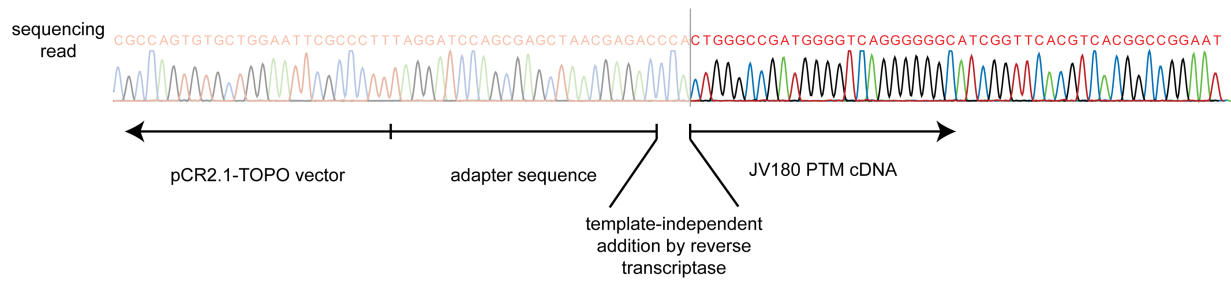

**Figure S11. Transcript start site mapping of the JV180  $P_{ftdA}$  by cRACE.** The sequencing read was aligned with the JV180 genome sequence.

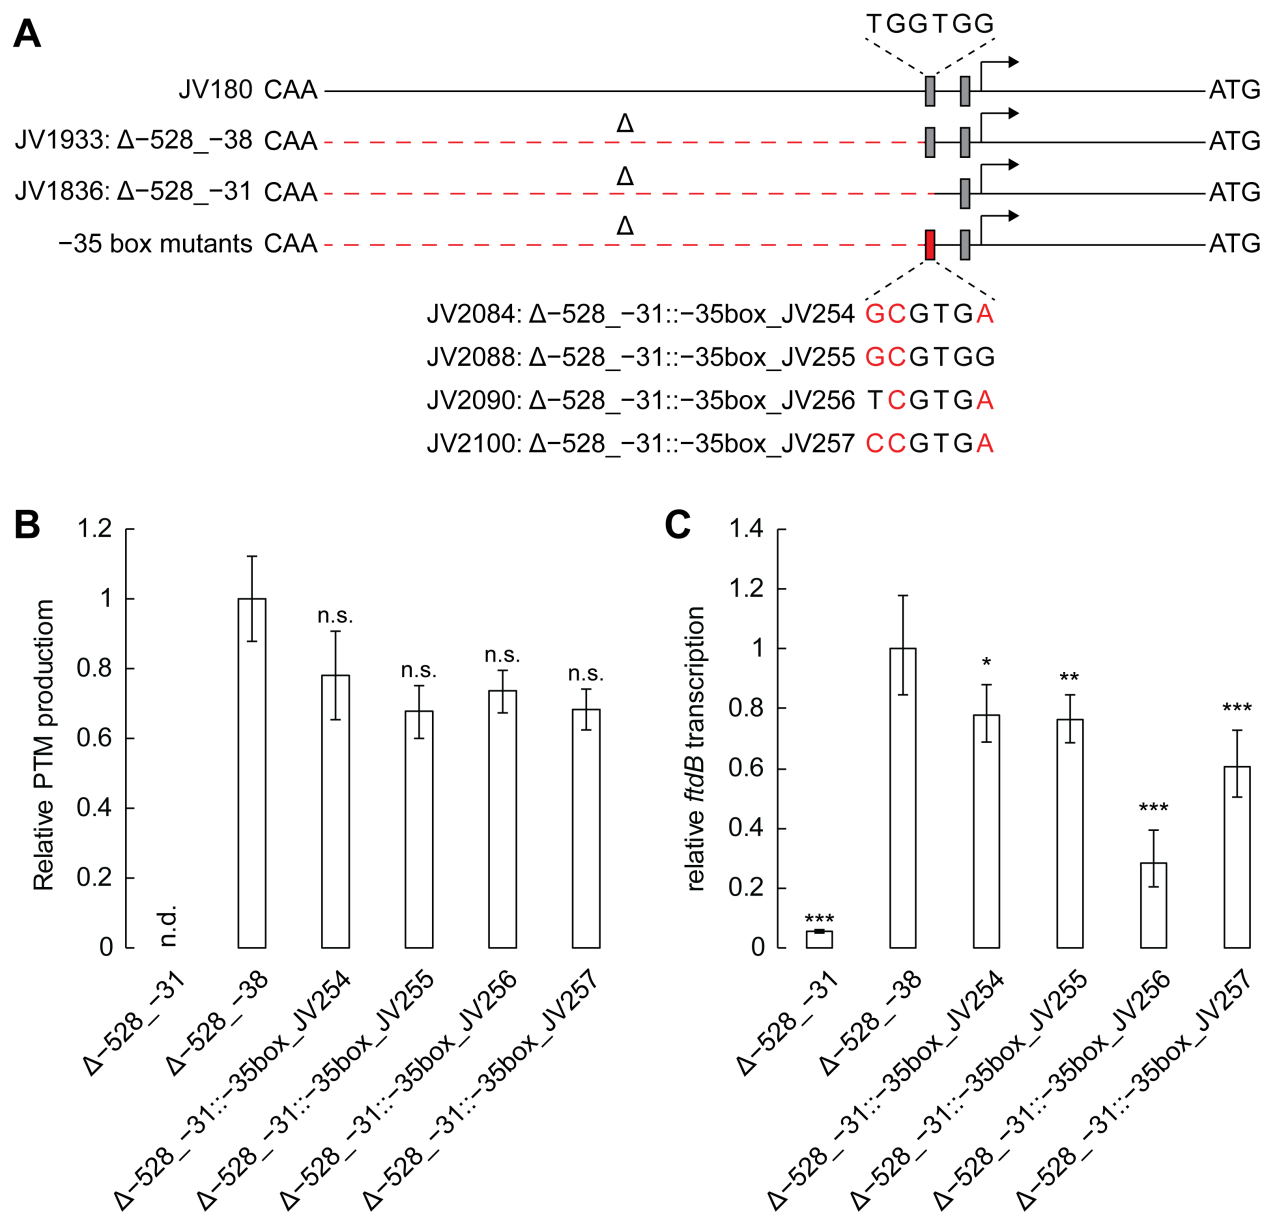

**Figure S12. Mutations in the -35 box cause slight decreases in PTM BGC expression. (A)** A diagram of the  $P_{ftdA}$  region in -35 box mutants. Due to difficulties in cloning, IFO13350-type -35 boxes were introduced into the Δ-528\_-31 mutant background. **(B)** Relative PTM production from -35 box mutants (n = 3). **(C)** Relative *ftdB* transcript abundance from -35 box mutants (n = 6). Statistical significance was calculated by Student's T-test relative to the Δ-528\_-38 strain (\*p < 0.05, \*\*p < 0.01, \*\*\*p < 0.001). Bars represent standard deviation.

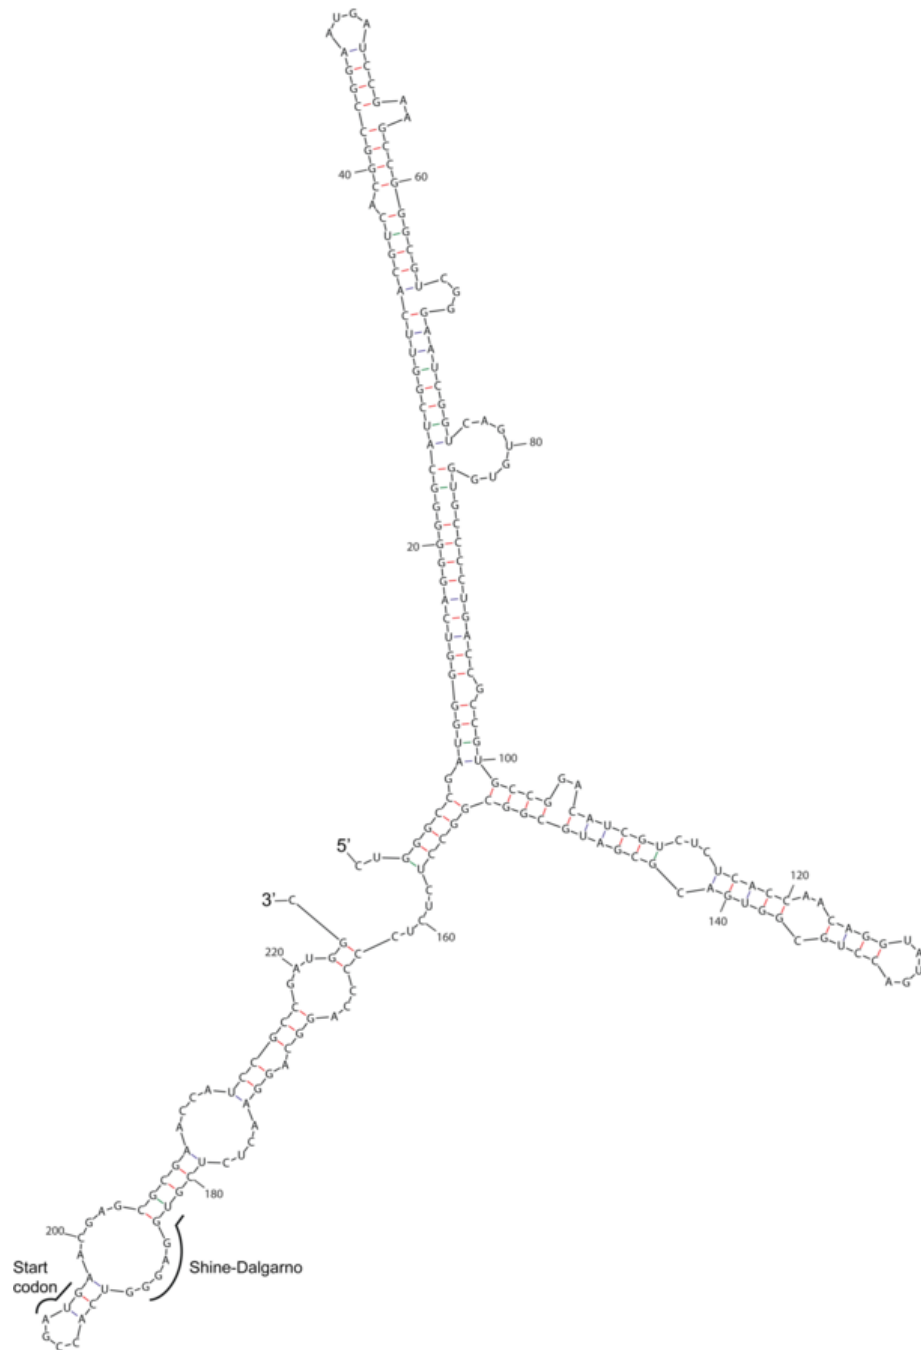

**Figure S13. Predicted secondary structure of the JV180  $P_{ftdA}$  UTR.** The structure was predicted with mFold using the RNA folding form for the UTR sequence and the first 30 nucleotides of *ftdA*. The 5' end, 3' end, Shine-Dalgarno sequence, and the start codon are labeled.

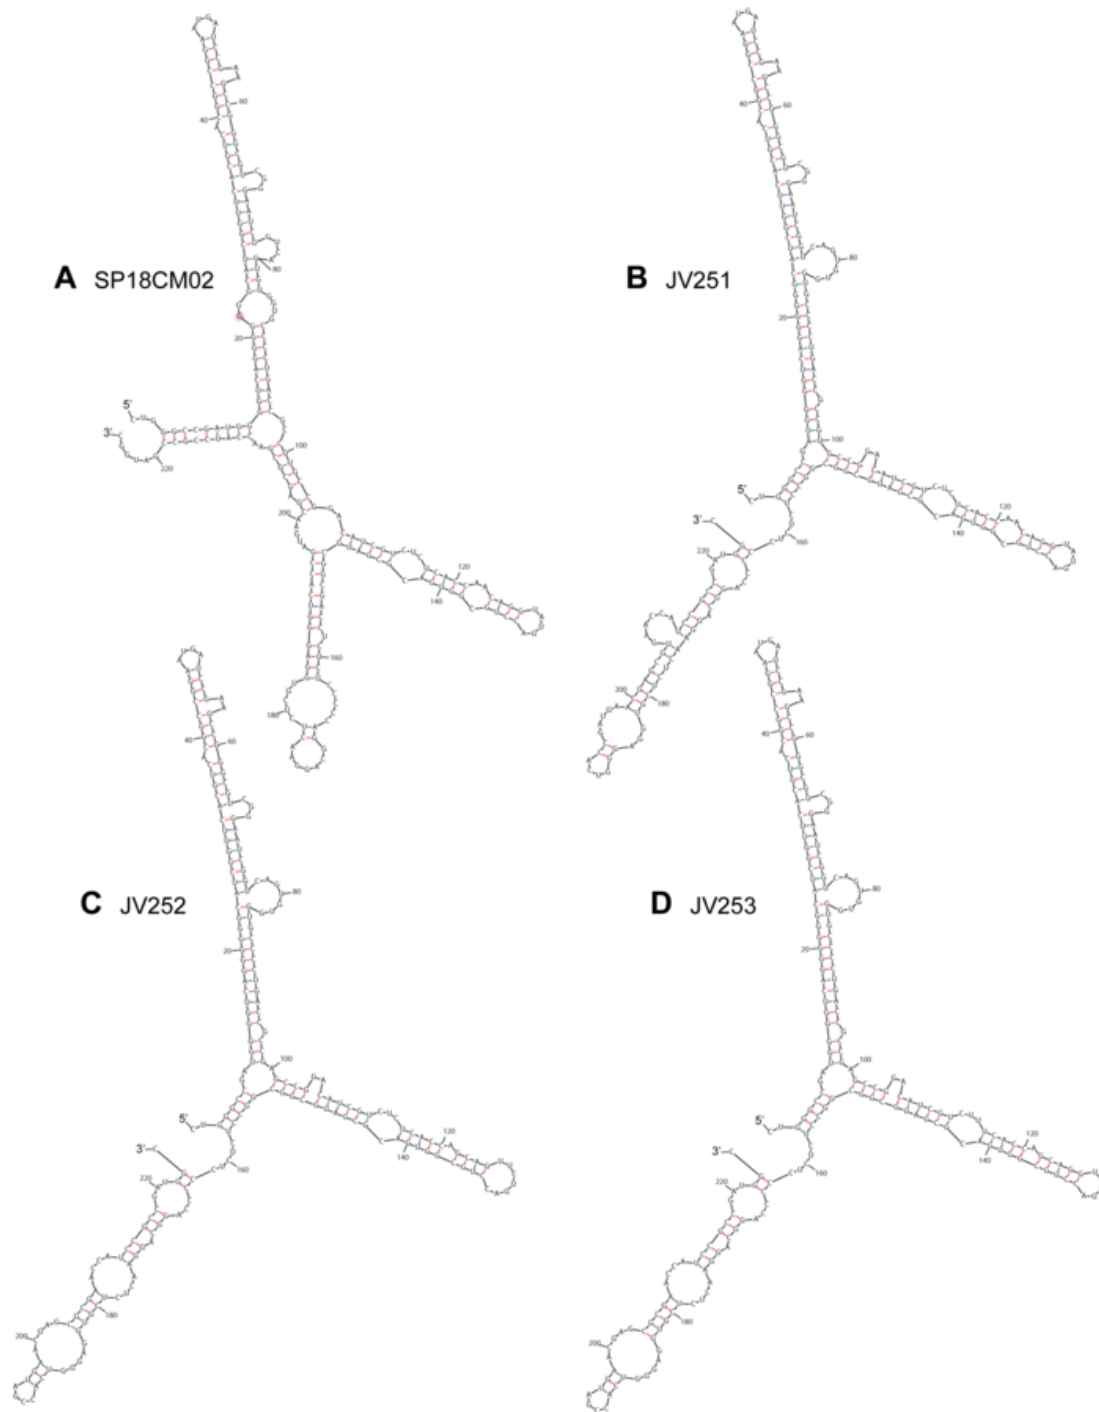

**Figure S14. Predicted secondary structure of the  $P_{ftdA}$  UTR from JV180-like  $P_{ftdA}$ 's.** The structures were predicted with mFold using the RNA folding form for the UTR sequence and the first 30 nucleotides of *ftdA* for (A) SP18CM02, (B) JV251, (C) JV252, and (D) JV253. The SP18CM02 has an additional nucleotide (indicated with a red circle) that greatly alters its structure.

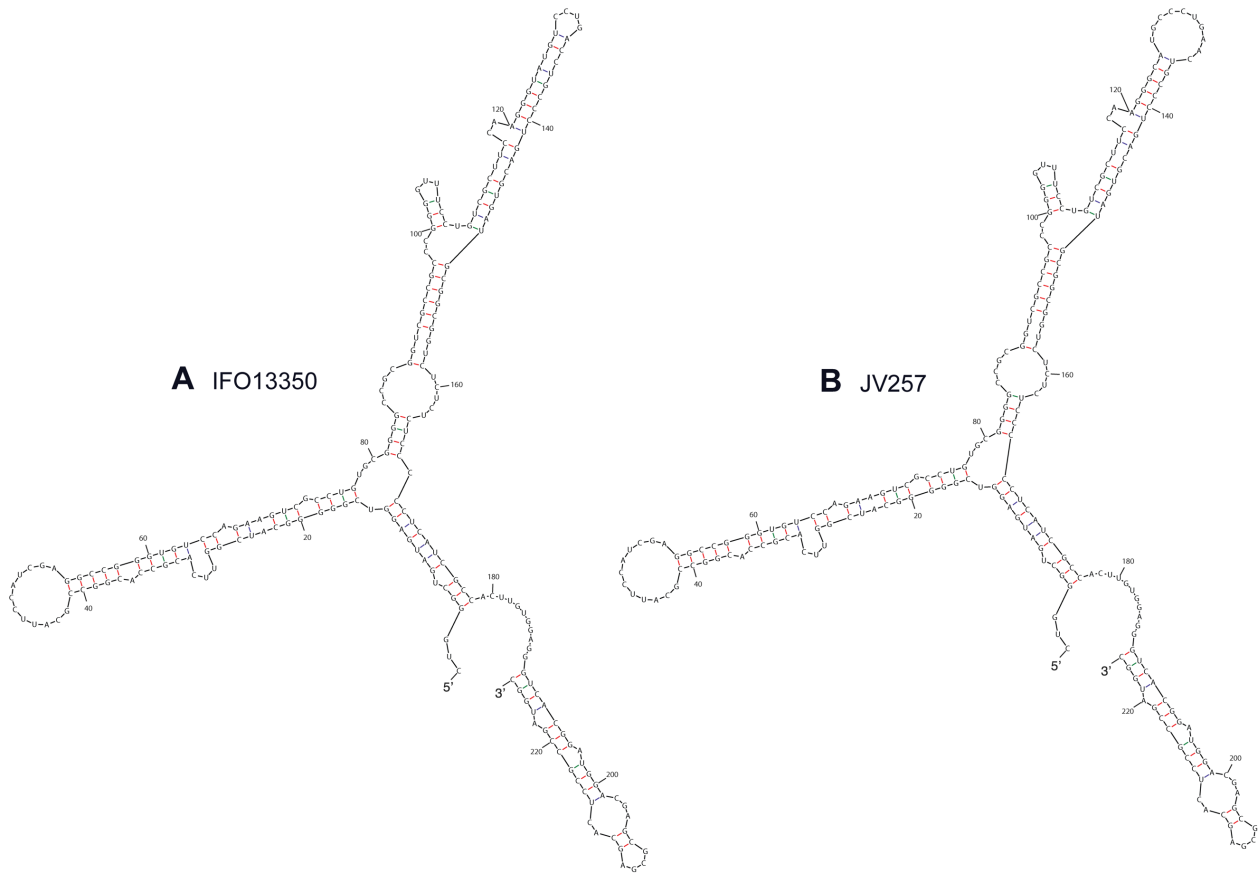

**Figure S15. Predicted secondary structure of the  $P_{ftdA}$  UTR from strains (A) IFO13350 and (B) JV257.** The structures were predicted with mFold using the RNA folding form for the UTR sequence and the first 30 nucleotides of *ftdA*.

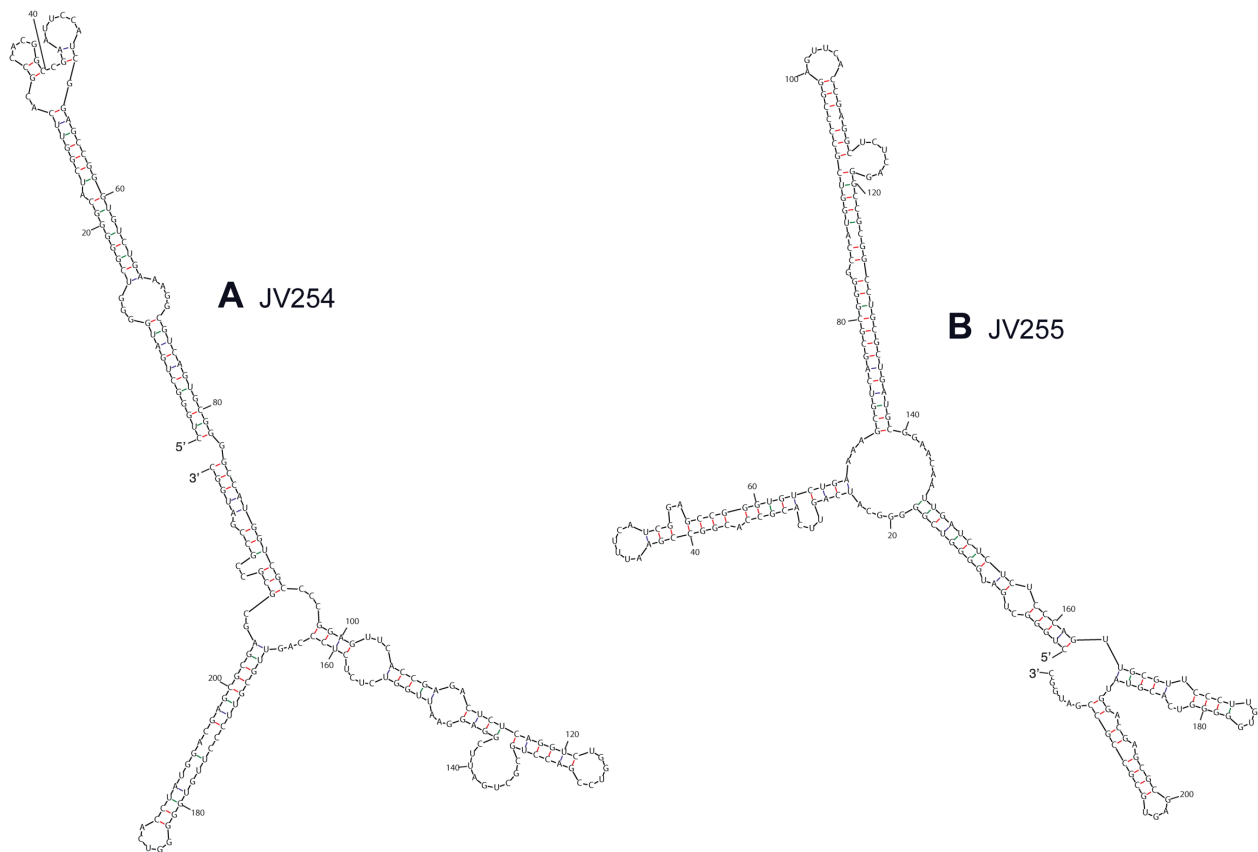

**Figure S16.** Predicted secondary structure of the *P<sub>ftdA</sub>* UTR from strains (A) JV254 and (B) JV255. The structures were predicted with mFold using the RNA folding form for the UTR sequence and the first 30 nucleotides of *ftdA*.

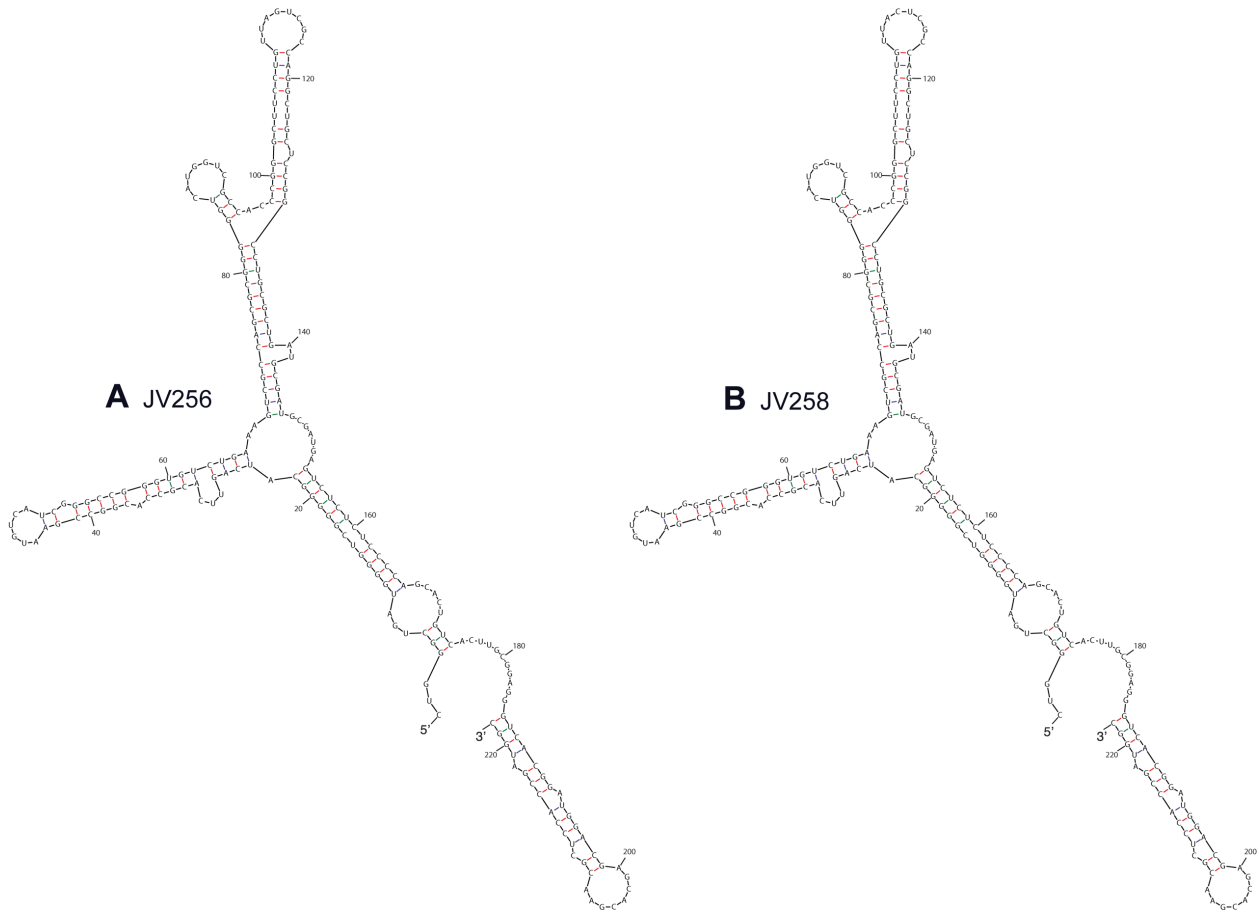

**Figure S17. Predicted secondary structure of the  $P_{ftdA}$  UTR from strains (A) JV256 and (B) JV258.** The structures were predicted with mFold using the RNA folding form for the UTR sequence and the first 30 nucleotides of *ftdA*.



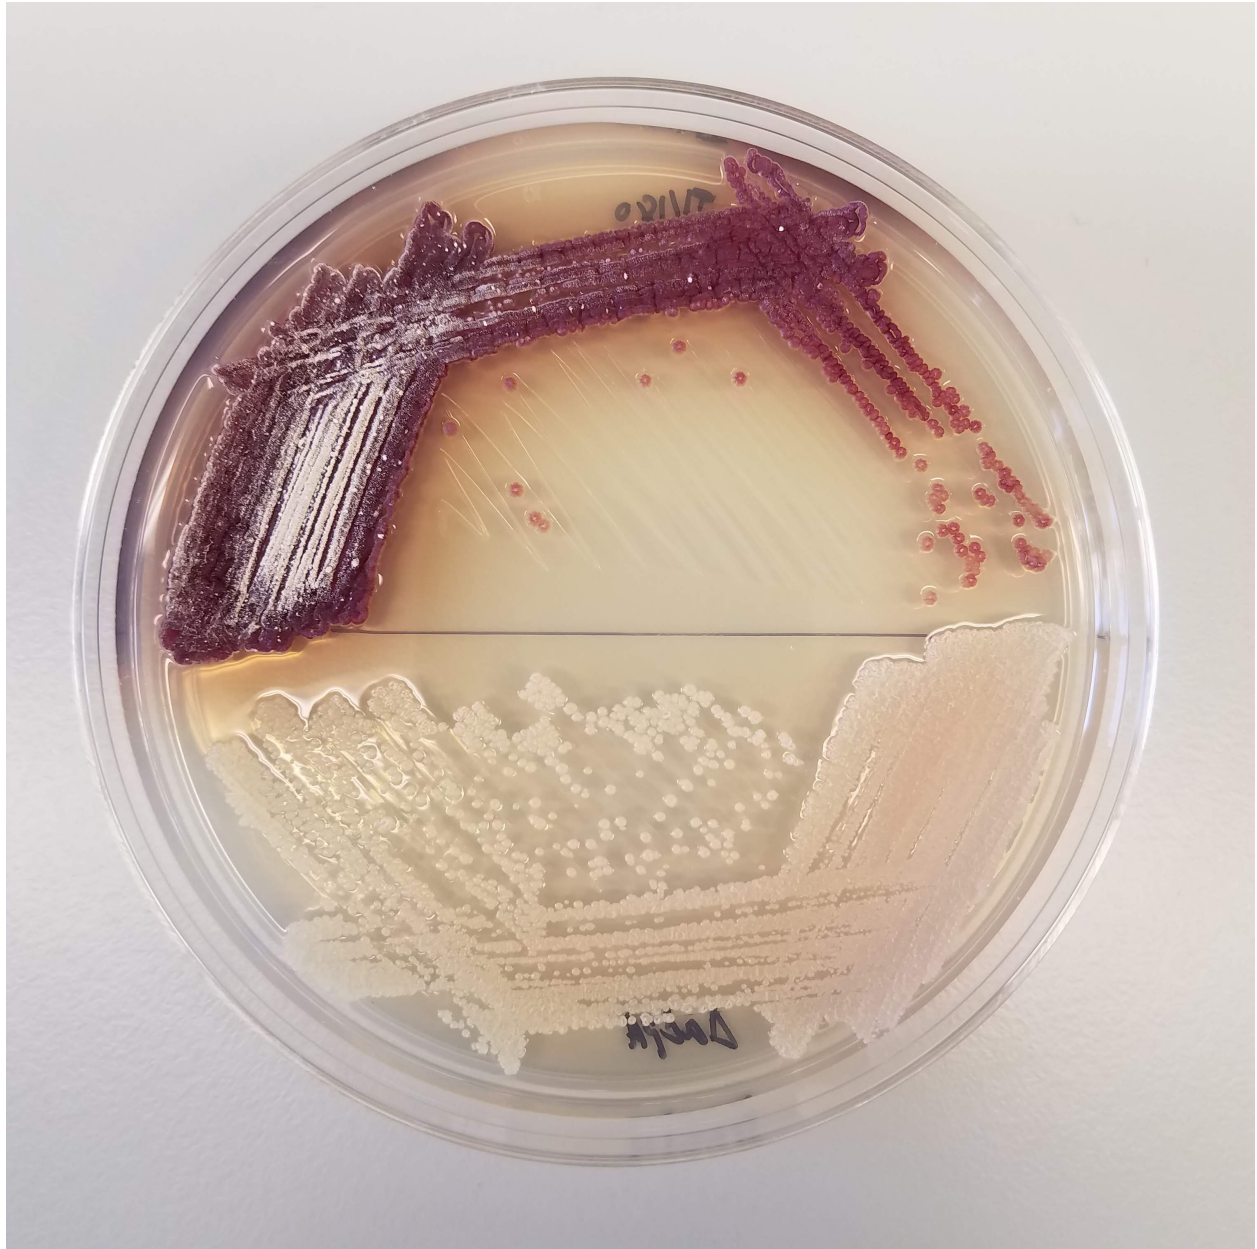

**Figure S18. *adpA* is required for morphological development and secondary metabolite expression.** (top) Wild-type JV180 and (bottom) its  $\Delta adpA$  mutant (JV556) were streaked on ISP2 agar and incubated for 2 days at 28 °C. The  $\Delta adpA$  mutant is deficient in secondary metabolite production (red pigment) and morphological differentiation (white aerial mycelia), which are exhibited by the parent strain.

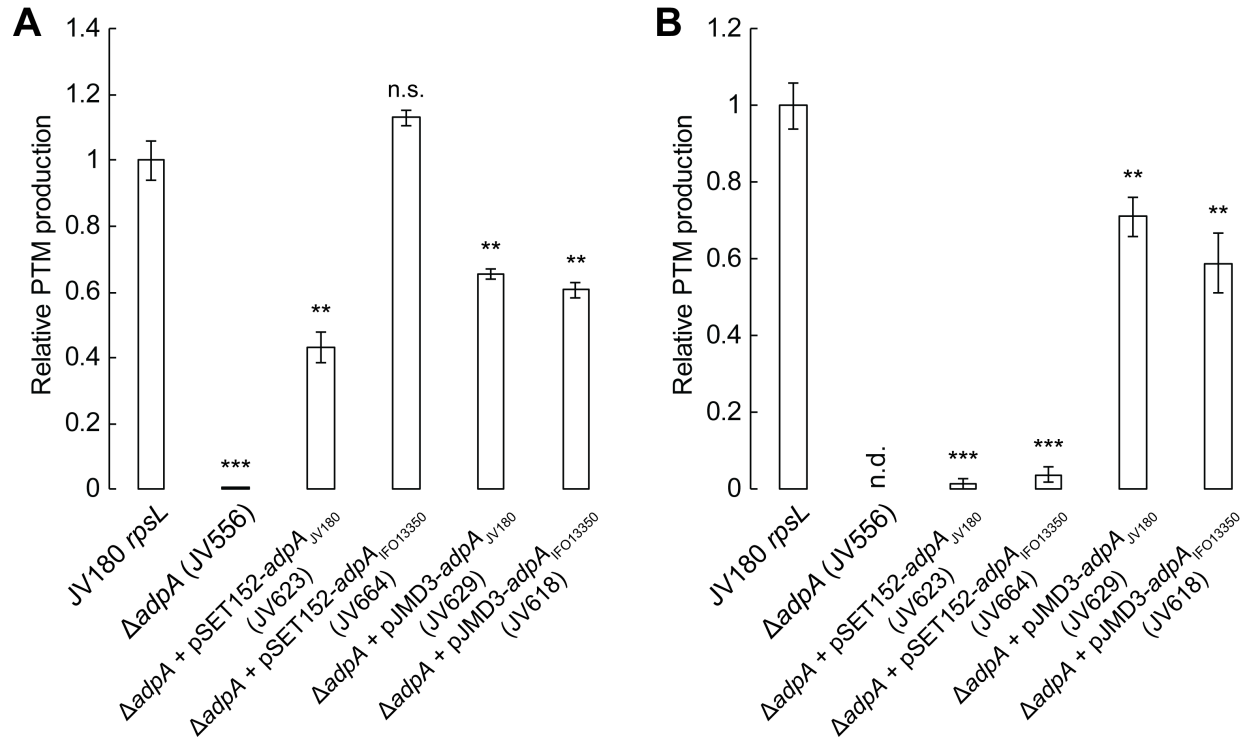

**Figure S19. Additional complementation data for  $\Delta adpA$ .** Relative PTM production (**A**) on solid agar media (n = 3) and (**B**) in shake flasks (n = 4, except for JV180 *rpsL* where n = 3). The pSET152-*adpA* constructs were designed to express *adpA* under its native promoter and failed to express properly in flask cultures, whereas the pJMD3 vector uses the constitutive *P<sub>ermE\*</sub>*. We speculate the pSET152-*adpA* construct failed to express properly in flask cultures due to differences in culture conditions, which is in line with the previous report that AdpA only appeared to be a transcriptional activator for the PTM BGC in strain IFO13350 when grown on solid media(19). Additionally, the actual *adpA* promoter could contain more regulatory binding regions upstream which were not included in the construct. Statistical significance was calculated by Student's T-test relative to the JV180 *rpsL* parent strain (\*p < 0.05, \*\*p < 0.01, \*\*\*p < 0.001). Bars represent standard deviation.

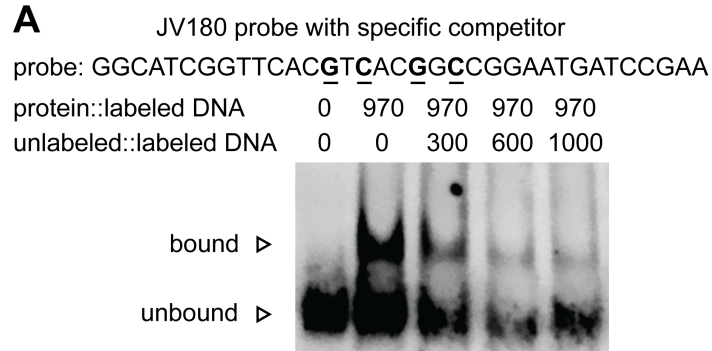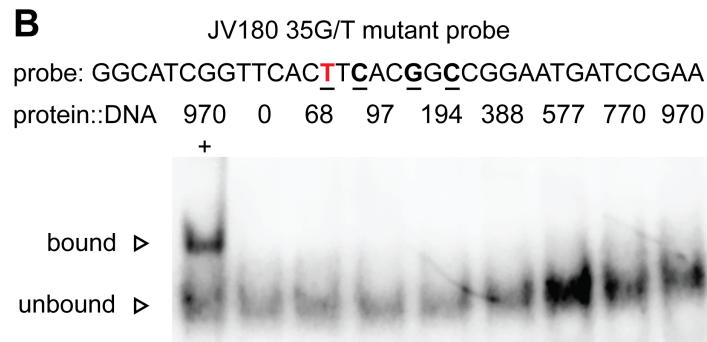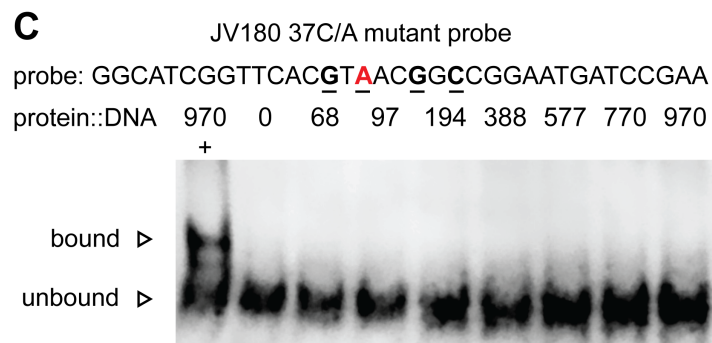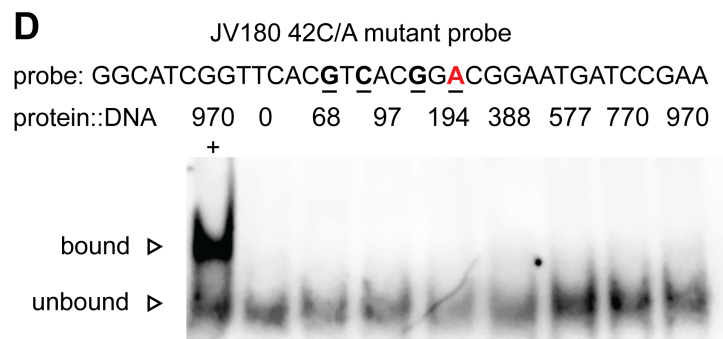

**Figure S20. Additional electrophoretic mobility shift assays with AdpA-*P<sub>ftdA</sub>*.** (A) Competition assay with unlabeled DNA probe. (B-D) assays with JV180 probes containing transversion mutations in nucleotides reported to directly interact with AdpA. The lane marked by the (+) sign is a positive control, using wild-type probe sequence.



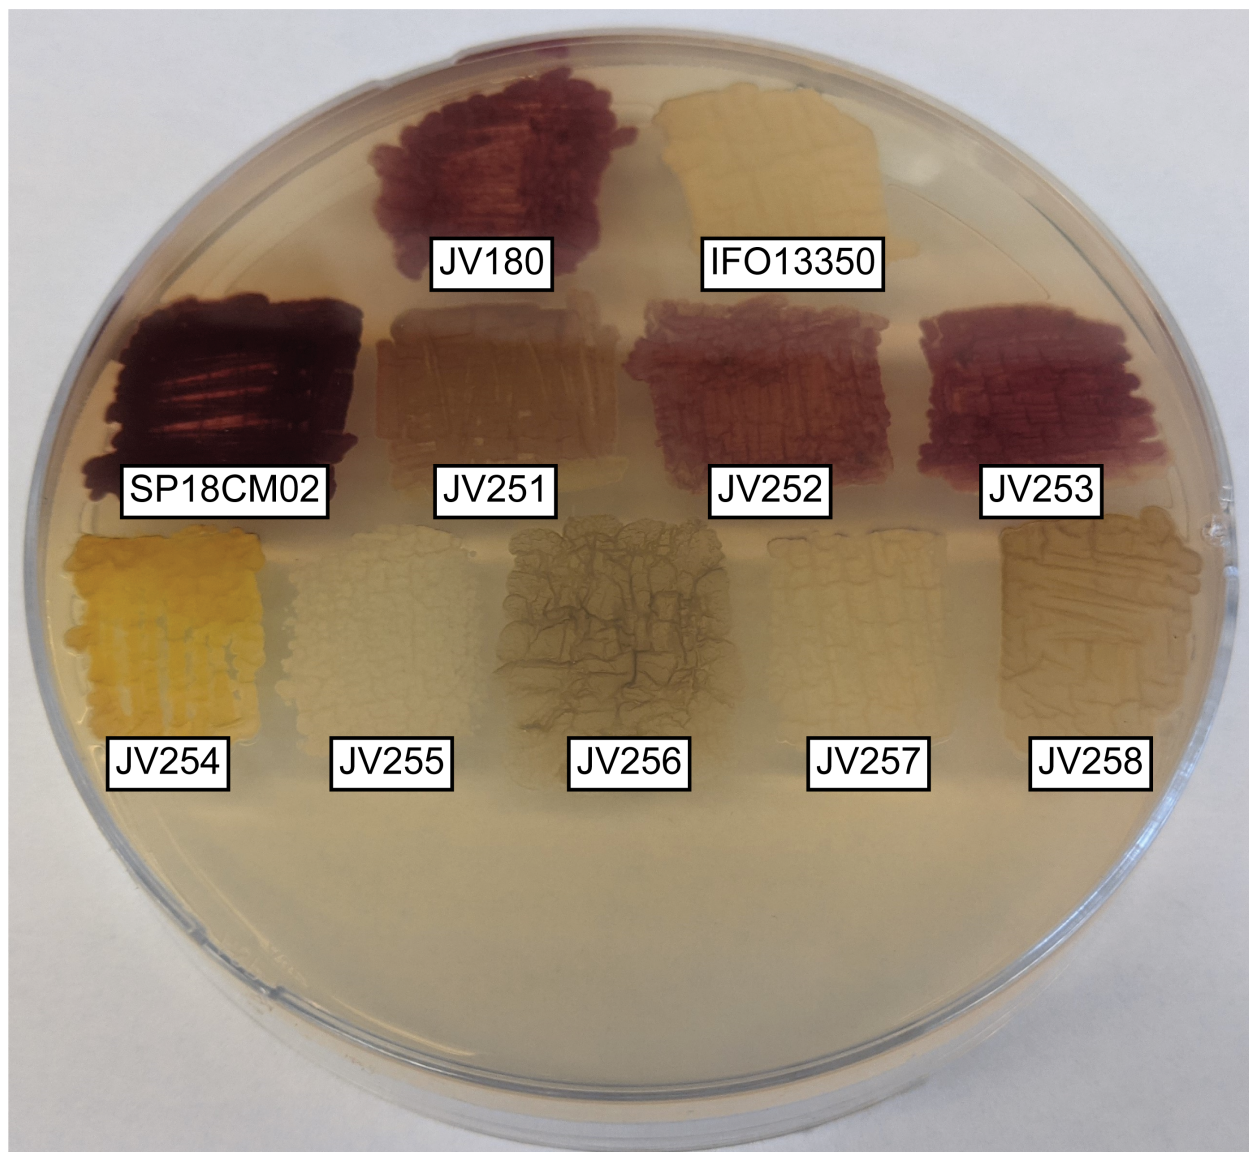

**Figure S22. JV180-subclade strains produce a red pigment absent in other *S. griseus* clade strains.** Strains JV180, IFO13350, SP18CM02, and JV251-JV258 were streaked on ISP2 and incubated for 2 days at 28°C.

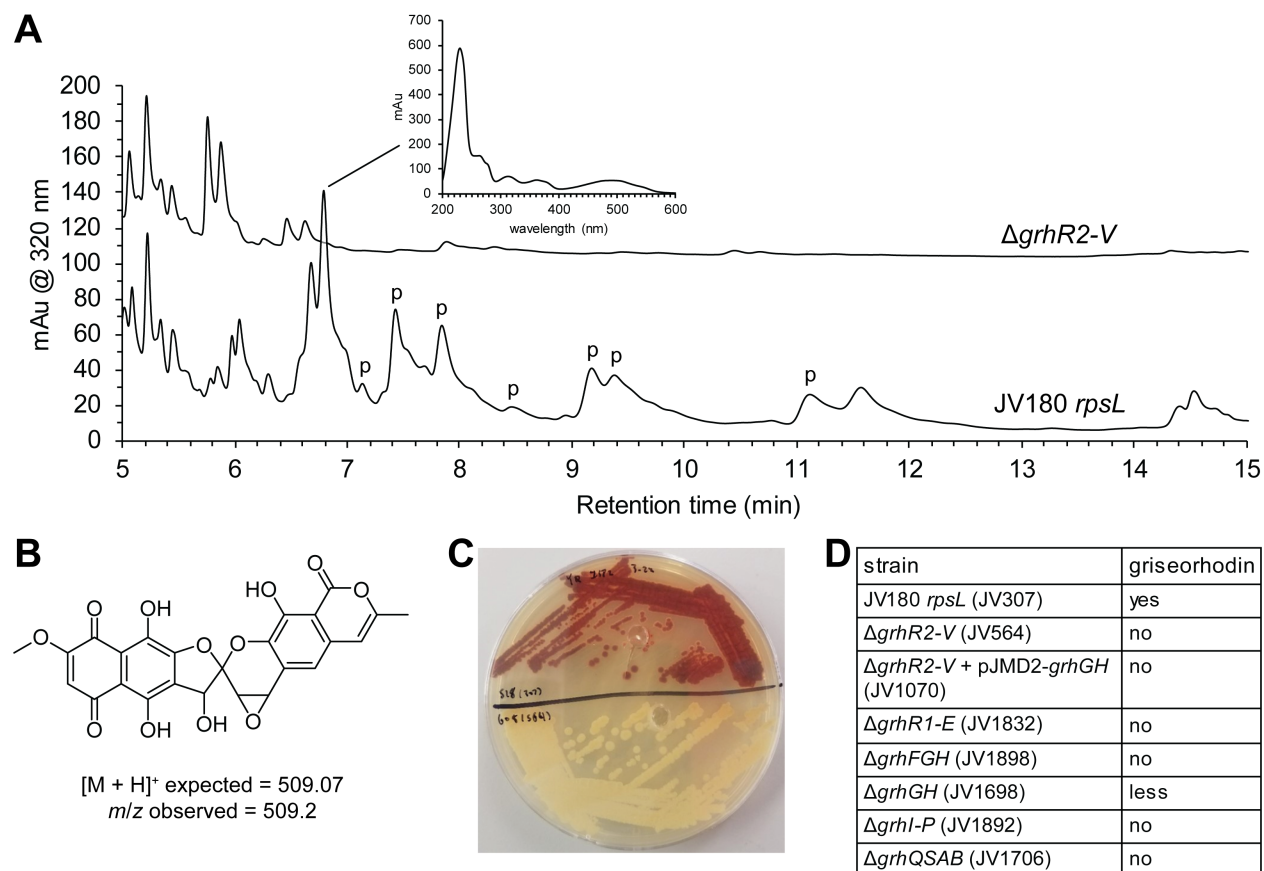

**Figure S23. Identification of griseorhodin in JV180 culture extracts.** (A) UV chromatogram of JV180 *rpsL* and  $\Delta$ *grhR2-V* mutant mutants. (Inset) absorbance spectrum of the putative griseorhodin A peak, which closely matches the absorbance characteristics reported previously(21). PTM peaks (marked with p) were also missing in the  $\Delta$ *grhR2-V* mutant. (B) The structure of griseorhodin A and the expected and observed  $m/z$ . (C) Image of JV180 *rpsL* (top) and the  $\Delta$ *grhR2-V* mutant (bottom) streaked on ISP2 agar and incubated for 2 days at 28°C. The  $\Delta$ *grhR2-V* mutant lacks griseorhodin pigmentation. (D) griseorhodin production observed from various *grh* cluster mutants.

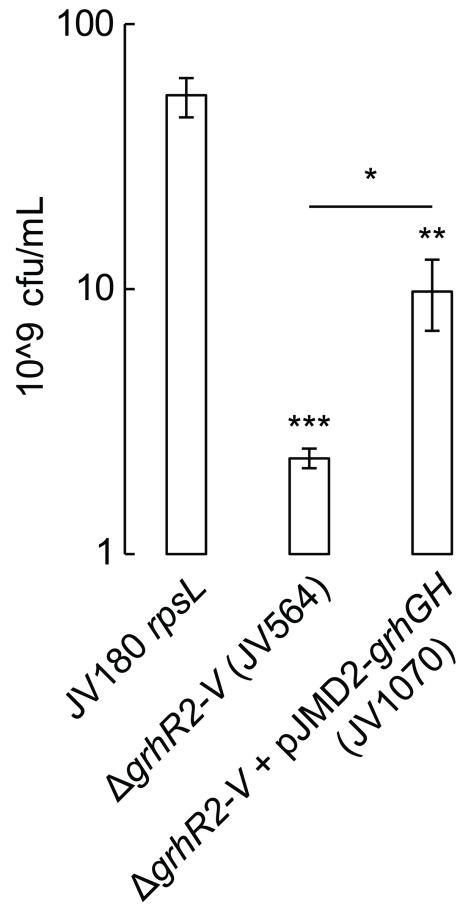

**Figure S24. Sporulation is reduced in the  $\Delta$ *grhR2-V* mutant and partially complemented by ectopically expressing *grhGH*.** Statistical significance was calculated by Student's T-test relative to the JV180 *rpsL* parent strain or otherwise indicated (n = 3; \*p < 0.05, \*\*p < 0.01, \*\*\*p < 0.001). Bars represent standard deviation.

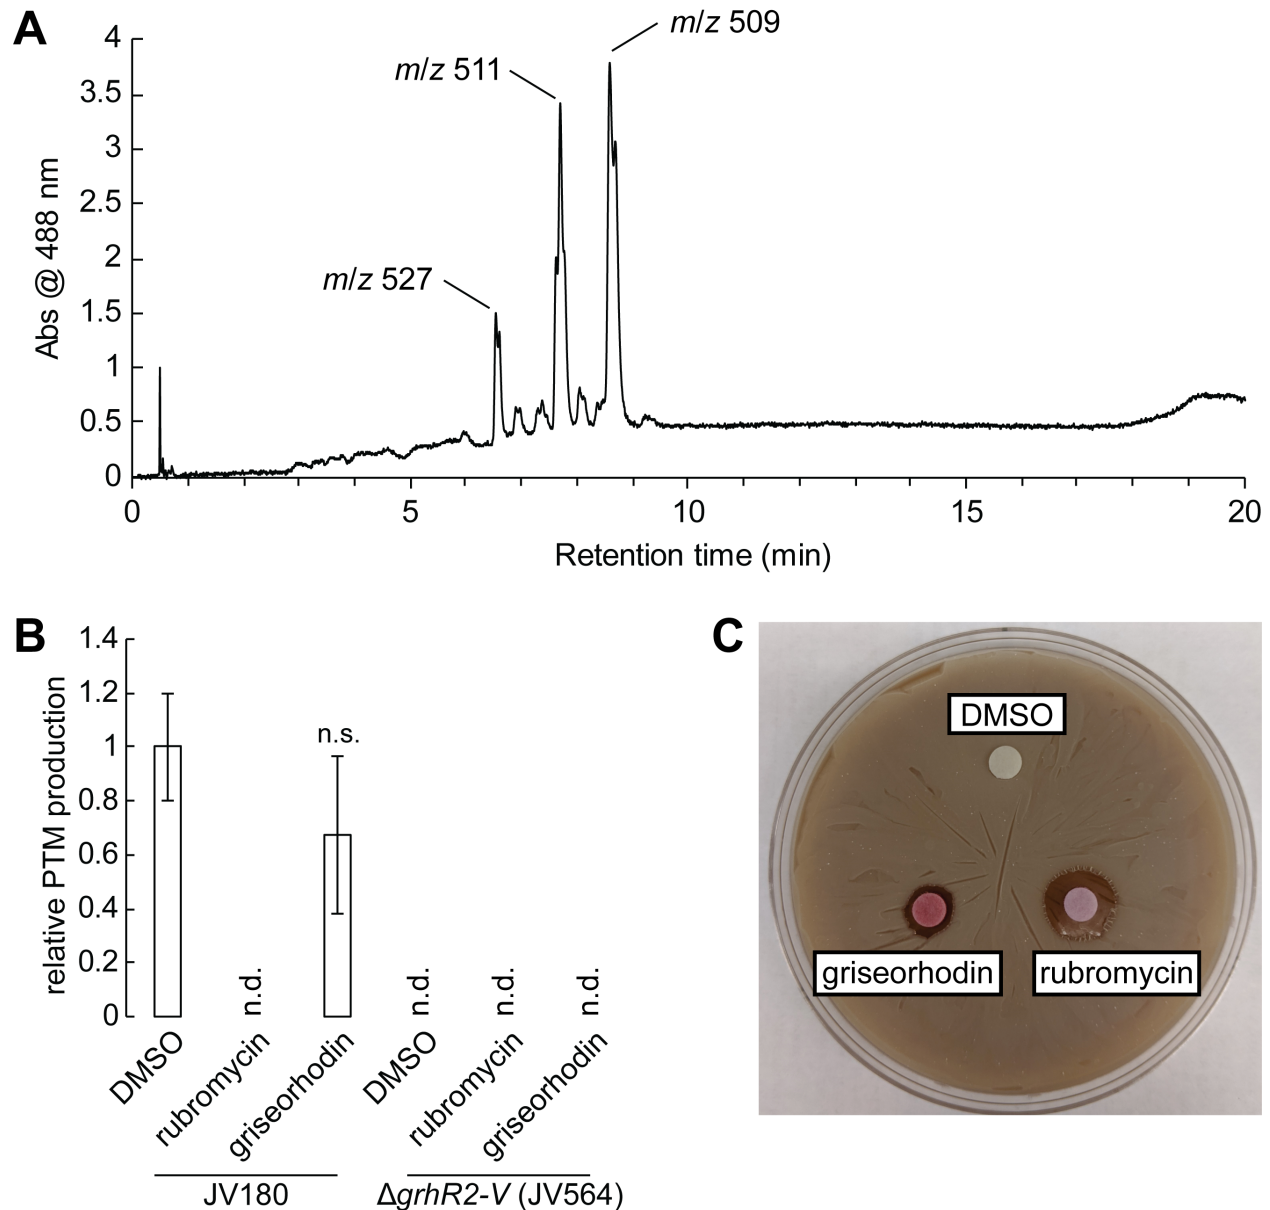

**Figure S25. Griseorhodin does not act as a signaling compound in *Streptomyces* sp. strain JV180.** (A) UV chromatogram of the griseorhodin-enriched fraction. The  $m/z$  509, 511, and 527 peaks have the same masses as griseorhodin A (22), griseorhodin G (21), and griseorhodin C (23). (B) PTM production by JV180 and its  $\Delta$ grhR2-V mutant in flasks with added DMSO (negative control), the griseorhodin-enriched fraction, or  $\gamma$ -rubromycin ( $n = 3$ ). (C) Disc diffusion assay of  $\Delta$ grhR2-V mutant with DMSO (negative control), the griseorhodin-enriched fraction, and  $\gamma$ -rubromycin. PTM production and sporulation were not restored by a chemical signaling mechanism. Instead, production and growth inhibition were observed. Statistical significance was calculated by Student's T-test relative to the DMSO control (\* $p < 0.05$ , \*\* $p < 0.01$ , \*\*\* $p < 0.001$ ).



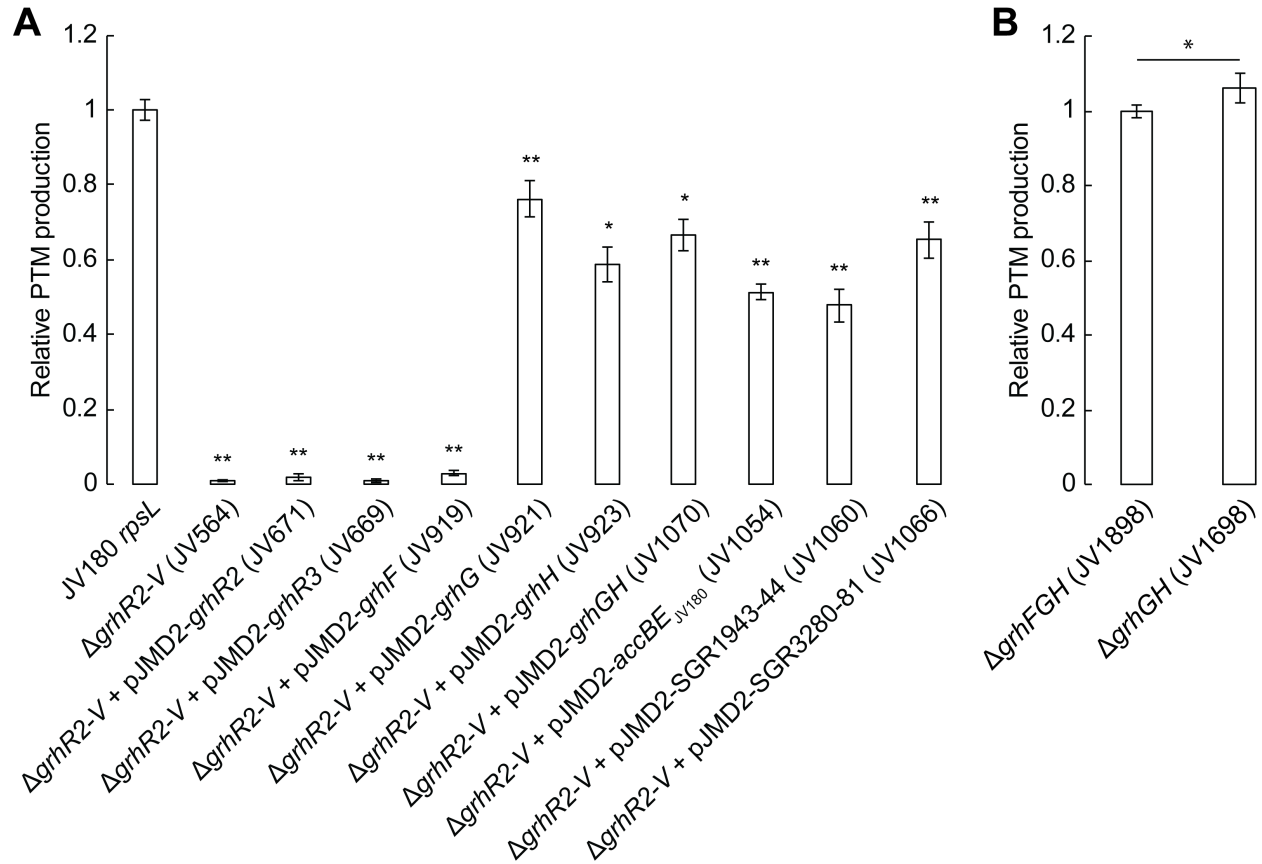

**Figure S26. Two acetyl-CoA carboxylase genes play a key role in the *grh*-PTM BGC interaction. (A)** PTM production by the  $\Delta$ *grhR2-V* mutant (JV564) on solid media and complementation by various constructs. *grhR2*, *grhR3*, and *grhF* were not able to restore PTM production, while *grhG* and/or *grhH* were able to restore some PTM production. Additionally, *accBE* and their homologs from strain IFO13350 were also able to restore some PTM production (n = 3 for JV180 *rpsL* and JV564, n = 2 for complementation strains). **(B)** PTM production by the  $\Delta$ *grhFGH* and  $\Delta$ *grhGH* mutants on solid media barely differs (n = 3). Statistical significance was calculated by Student's T-test relative to the JV180 *rpsL* parent strain (\*p < 0.05, \*\*p < 0.01, \*\*\*p < 0.001). Bars represent standard deviation.

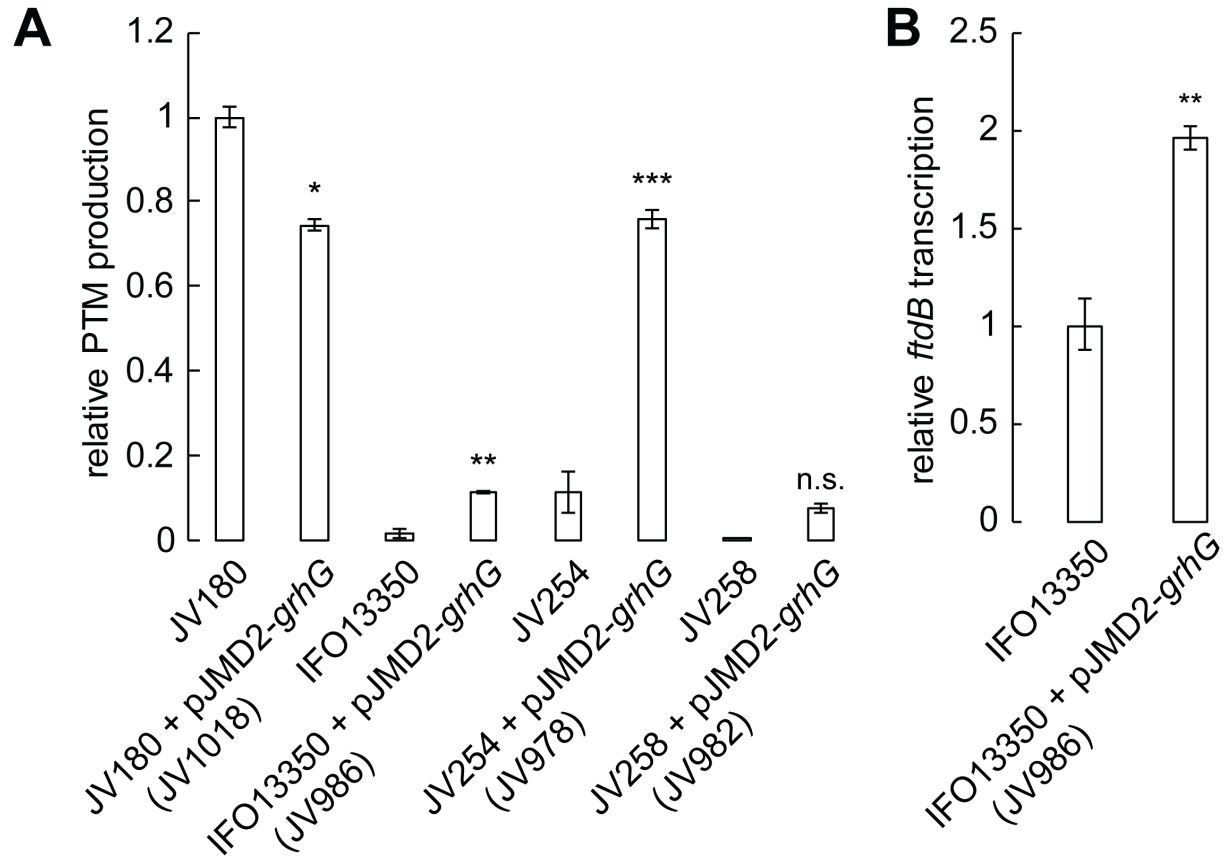

**Figure S27. Heterologous expression of *grhG* in IFO13350-like strains increases PTM production and transcription.** (A) Relative PTM production by strains JV180, IFO13350, JV254, and JV258 heterologously expressing *grhG* on solid agar (for IFO13350, JV254, and JV258,  $n = 3$ ; otherwise,  $n = 2$ ). (B) Relative *ftdB* transcript abundance in strain IFO13350 heterologously expressing *grhG*. Methods for culturing and extracting RNA were largely the same as for JV180-derived strains, except the samples were harvested after 2 days of culturing for RT-qPCR ( $n = 3$ ). Statistical significance was calculated by Student's T-test relative to the wild-type strains (\* $p < 0.05$ , \*\* $p < 0.01$ , \*\*\* $p < 0.001$ ). Bars represent standard deviation.

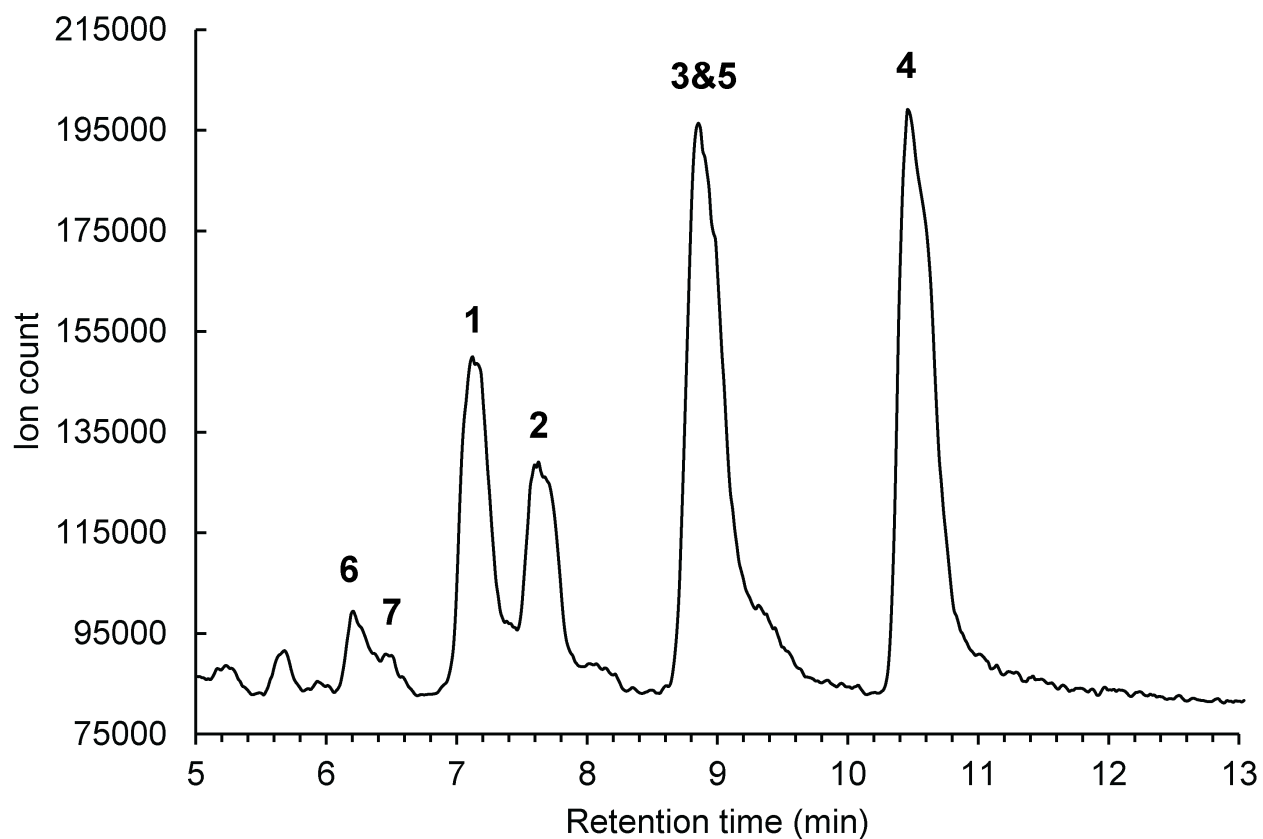

**Figure S28. Major PTM congeners produced by *S. griseus* clade strains quantified for comparison of PTM production.** A representative LC-MS/MS chromatogram of an extract from *Streptomyces* sp. strain JV180. The mass transitions observed for each peak are: **1**) 511 → 139; **2**) 513 → 154; **3**) 497 → 139; **4**) 495 → 139; **5**) 511 → 154; **6**) 509 → 139; and **7**) 511 → 154.

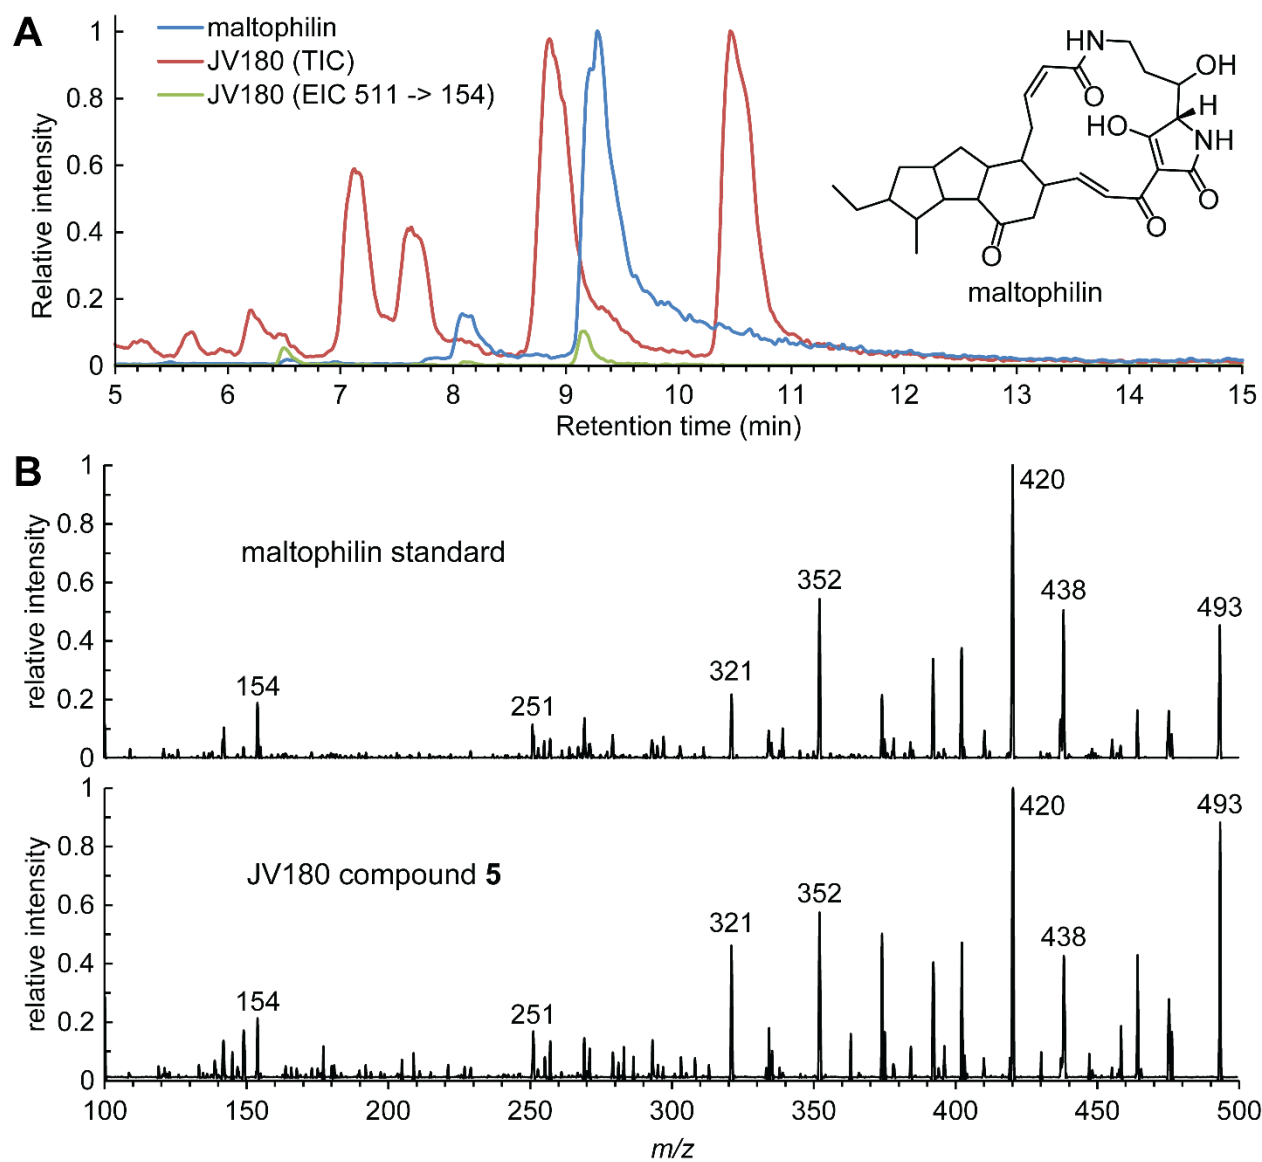

**Figure S29. *S. griseus* clade strains produce maltophilin-like PTMs. (A)** representative LC-MS/MS chromatograms of an extract from *Streptomyces* sp. strain JV180 and a maltophilin standard (structure shown in **inset** without stereocenters). **(B)** Product ion spectra produced by collision-induced dissociation (collision energy = 20 V) of the maltophilin standard and compound **5** produced by strain JV180.

## References

1. Y. Qi, E. Ding, J. A. V. Blodgett, Native and Engineered Clifednamide Biosynthesis in Multiple *Streptomyces* spp. *ACS Synth. Biol.* **7**, 357–362 (2018).
2. A. Bose, D. K. Newman, Regulation of the phototrophic iron oxidation (*pio*) genes in *Rhodospseudomonas palustris* TIE-1 is mediated by the global regulator, FixK. *Mol. Microbiol.* **79**, 63–75 (2011).
3. S. Morris. Kupchan, A. H. Gray, M. D. Grove, Tumor Inhibitors. XXIII. The Cytotoxic Principles of *Marah oreganus* H. *J. Med. Chem.* **10**, 337–340 (1967).
4. T. Emran, *et al.*, Effects of organic extracts and their different fractions of five Bangladeshi plants on in vitro thrombolysis. *BMC Complement. Altern. Med.* **15**, 1–8 (2015).
5. J. A. V. Blodgett, *et al.*, Unusual transformations in the biosynthesis of the antibiotic phosphinothricin tripeptide. *Nat. Chem. Biol.* **3**, 480–485 (2007).
6. J. A. V. Blodgett, *et al.*, Common biosynthetic origins for polycyclic tetramate macrolactams from phylogenetically diverse bacteria. *Proc. Natl. Acad. Sci.* **107**, 11692–11697 (2010).
7. Y. Qi, *et al.*, Draft Genome Sequences of Two Polycyclic Tetramate Macrolactam Producers, *Streptomyces* sp. Strains JV180 and SP18CM02. *Microbiol. Resour. Announc.* **9**, 1–3 (2020).
8. C. J. Marx, M. E. Lidstrom, Development of improved versatile broad-host-range vectors for use in methylotrophs and other Gram-negative bacteria. *Microbiology*, **147**, 2065–2075 (2001).
9. M. Bierman, *et al.*, Plasmid cloning vectors for the conjugal transfer of DNA from *Escherichia coli* to *Streptomyces* spp. *Gene* **116**, 43–49 (1992).
10. B. Ko, *et al.*, Construction of a new integrating vector from actinophage  $\phi$ OZJ and its use in multiplex *Streptomyces* transformation. *J. Ind. Microbiol. Biotechnol.* **47**, 73–81 (2020).
11. Y. Qi, E. Ding, J. A. V. Blodgett, Native and Engineered Clifednamide Biosynthesis in Multiple *Streptomyces* spp. *ACS Synth. Biol.* **7**, 357–362 (2018).
12. J. Claesen, M. J. Bibb, Biosynthesis and Regulation of Grisemycin, a New Member of the Linaridin Family of Ribosomally Synthesized Peptides Produced by *Streptomyces griseus* IFO 13350. *J. Bacteriol.* **193**, 2510–2516 (2011).
13. S.-H. Yoon, S.-M. Ha, J. Lim, S. Kwon, J. Chun, A large-scale evaluation of algorithms to calculate average nucleotide identity. *Antonie Van Leeuwenhoek* **110**, 1281–1286 (2017).
14. Y. Guo, W. Zheng, X. Rong, Y. Huang, A multilocus phylogeny of the *Streptomyces griseus* 16S rRNA gene clade: use of multilocus sequence analysis for streptomycete systematics. *Int. J. Syst. Evol. Microbiol.* **58**, 149–159 (2008).

15. X. Rong, Y. Huang, Taxonomic evaluation of the *Streptomyces griseus* clade using multilocus sequence analysis and DNA-DNA hybridization, with proposal to combine 29 species and three subspecies as 11 genomic species. *Int. J. Syst. Evol. Microbiol.* **60**, 696–703 (2010).
16. T. Kieser, M. J. Bibb, M. J. Buttner, K. F. Chater, D. A. Hopwood, *Practical Streptomyces Genetics* (John Innes Foundation, 2000).
17. I. Kojima, Y. R. Cheng, V. Mohan, A. L. Demain, Carbon source nutrition of rapamycin biosynthesis in *Streptomyces hygroscopicus*. *J. Ind. Microbiol.* **14**, 436–439 (1995).
18. R. J. Hickey, H. D. Tresner, A COBALT-CONTAINING MEDIUM FOR SPORULATION OF STREPTOMYCES SPECIES. *J. Bacteriol.* **64**, 891–892 (1952).
19. A. Higo, H. Hara, S. Horinouchi, Y. Ohnishi, Genome-wide Distribution of AdpA, a Global Regulator for Secondary Metabolism and Morphological Differentiation in *Streptomyces*, Revealed the Extent and Complexity of the AdpA Regulatory Network. *DNA Res.* **19**, 259–274 (2012).
20. K. Blin, *et al.*, antiSMASH 5.0: updates to the secondary metabolite genome mining pipeline. *Nucleic Acids Res.* **47**, W81–W87 (2019).
21. R. M. Stroshane, *et al.*, ISOLATION AND STRUCTURE ELUCIDATION OF A NOVEL GRISEORHODIN. *J. Antibiot.* **32**, 197–204 (1979).
22. K. Eckardt, D. Tresselt, W. Ihn, Antibiotika aus actinomyceten. zur chemischen konstitution des antibiotikums griseorhodin A: I—isolierung und struktur von zwei abbauprodukten. *Tetrahedron* **34**, 399–404 (1978).
23. K. Eckardt, D. Tresselt, W. Ihn, THE STRUCTURE OF THE ANTIBIOTIC GRISEORHODIN C. *J. Antibiot.* **31**, 970–973 (1978).
